# Supplementary material for: Bt Crop Effects on Functional Guilds of Non-Target Arthropods: A Meta-Analysis
Source: PLoS One. 2008 May 7;3(5):e2118. doi: 10.1371/journal.pone.0002118 (PMC2346550; doi:10.1371/journal.pone.0002118)
Supplement: Appendix S1 — Dataset used for analyses (4.46 MB XLS) [file pone.0002118.s001.xls]

## Sheet: Sheet1
new_id	article_id	author	publication_year	citation	title	author_affiliation	author_institute	spons_co_mrid	perf_co_mrid	was_peer_reviewed	country	continent	more_info_from_author	expmt_num	study_type	data_location	was_data_scanned	was_data_verified	crop_species	pip	pip_target	event	transgenic_hybrid_or_var	nontransgenic_hybrid_or_var	age_of_plant_leaves	pip_concentration	pip_concentration_range	pip_protein_msmt	pollen_concentration	pollen_concentration_range	was_pollen_sifted	sieve_description	pollen_stored_or_frozen	stored_frozen_description	pip_assessed_after	nontarget_phylum	nontarget_class	nontarget_order	nontarget_family	nontarget_genus	nontarget_species	nontarget_finest_grouping	ntarget_f_group_revised	Feeding style	replicate_data_issues	nontarget_init_age_or_stage	nontarget_final_age_or_stage	experiment_type	field_location
19	4	Orr & Landis	1997	Journal of Economic Entomology 90(4): 905-909	Oviposition of European corn borer (Lepidoptera: Pyralidae) and impact of natural enemy populations in transgenic versus isogenic corn	Academic	Department of Entomology and Pesticide Research Center	na	na	yes	United States	North America	no	1	Field	Table 2	no	na	maize	Cry1Ab	Lepidoptera	Bt176	inbred line 00526	inbred line 00526	107 days old	not specified	na	na	na	na	na	na	no	na	na	Arthropoda	Insecta	Hemiptera	Anthocoridae	Orius	Orius insidiosus	Orius insidiosus	predator	Piercing	na	natural population of variable ages	nymph	Chronic toxicology	near Constantine, Michigan
20	4	Orr & Landis	1997	Journal of Economic Entomology 90(4): 905-909	Oviposition of European corn borer (Lepidoptera: Pyralidae) and impact of natural enemy populations in transgenic versus isogenic corn	Academic	Department of Entomology and Pesticide Research Center	na	na	yes	United States	North America	no	1	Field	Table 2	no	na	maize	Cry1Ab	Lepidoptera	Bt176	inbred line 00526	inbred line 00526	107 days old	not specified	na	na	na	na	na	na	no	na	na	Arthropoda	Insecta	Hemiptera	Anthocoridae	Orius	Orius insidiosus	Orius insidiosus	predator	Piercing	na	natural population of variable ages	adult	Chronic toxicology	near Constantine, Michigan
21	4	Orr & Landis	1997	Journal of Economic Entomology 90(4): 905-909	Oviposition of European corn borer (Lepidoptera: Pyralidae) and impact of natural enemy populations in transgenic versus isogenic corn	Academic	Department of Entomology and Pesticide Research Center	na	na	yes	United States	North America	no	1	Field	Table 2	no	na	maize	Cry1Ab	Lepidoptera	Bt176	inbred line 00526	inbred line 00526	107 days old	not specified	na	na	na	na	na	na	no	na	na	Arthropoda	Insecta	Coleoptera	Coccinellidae	not specified	not specified	Coccinellidae	predator	Chewing	na	natural population of variable ages	larva	Chronic toxicology	near Constantine, Michigan
22	4	Orr & Landis	1997	Journal of Economic Entomology 90(4): 905-909	Oviposition of European corn borer (Lepidoptera: Pyralidae) and impact of natural enemy populations in transgenic versus isogenic corn	Academic	Department of Entomology and Pesticide Research Center	na	na	yes	United States	North America	no	1	Field	Table 2	no	na	maize	Cry1Ab	Lepidoptera	Bt176	inbred line 00526	inbred line 00526	107 days old	not specified	na	na	na	na	na	na	no	na	na	Arthropoda	Insecta	Coleoptera	Coccinellidae	not specified	not specified	Coccinellidae	predator	Chewing	na	natural population of variable ages	adult	Chronic toxicology	near Constantine, Michigan
23	4	Orr & Landis	1997	Journal of Economic Entomology 90(4): 905-909	Oviposition of European corn borer (Lepidoptera: Pyralidae) and impact of natural enemy populations in transgenic versus isogenic corn	Academic	Department of Entomology and Pesticide Research Center	na	na	yes	United States	North America	no	1	Field	Table 2	no	na	maize	Cry1Ab	Lepidoptera	Bt176	inbred line 00526	inbred line 00526	107 days old	not specified	na	na	na	na	na	na	no	na	na	Arthropoda	Insecta	Neuroptera	Chrysopidae	not specified	not specified	Chrysopidae	predator	Piercing	na	natural population of variable ages	larva	Chronic toxicology	near Constantine, Michigan
24	4	Orr & Landis	1997	Journal of Economic Entomology 90(4): 905-909	Oviposition of European corn borer (Lepidoptera: Pyralidae) and impact of natural enemy populations in transgenic versus isogenic corn	Academic	Department of Entomology and Pesticide Research Center	na	na	yes	United States	North America	no	1	Field	Table 2	no	na	maize	Cry1Ab	Lepidoptera	Bt176	inbred line 00526	inbred line 00526	107 days old	not specified	na	na	na	na	na	na	no	na	na	Arthropoda	Insecta	Neuroptera	Chrysopidae	not specified	not specified	Chrysopidae	predator	unknown	na	natural population of variable ages	adult	Chronic toxicology	near Constantine, Michigan
31	4	Orr & Landis	1997	Journal of Economic Entomology 90(4): 905-909	Oviposition of European corn borer (Lepidoptera: Pyralidae) and impact of natural enemy populations in transgenic versus isogenic corn	Academic	Department of Entomology and Pesticide Research Center	na	na	yes	United States	North America	no	2	Field	Table 3	no	na	maize	Cry1Ab	Lepidoptera	Bt176	inbred line 00526	inbred line 00526	107 days old	not specified	na	na	na	na	na	na	no	na	na	Arthropoda	Insecta	Hymenoptera	Braconidae & Ichneumonidae	Eriborus & Macrocentrus	Eriborus terebrans & Macrocentrus grandii	Eriborus terebrans & Macrocentrus grandii	parasitoid	Mandibulate-sucking	na	natural population of variable ages	adult	Tritrophic	near Constantine, Michigan
34	4	Orr & Landis	1997	Journal of Economic Entomology 90(4): 905-909	Oviposition of European corn borer (Lepidoptera: Pyralidae) and impact of natural enemy populations in transgenic versus isogenic corn	Academic	Department of Entomology and Pesticide Research Center	na	na	yes	United States	North America	no	3	Field	Table 1	no	na	maize	Cry1Ab	Lepidoptera	Bt176	inbred line 00526	inbred line 00526	107 days old	not specified	na	na	na	na	na	na	no	na	na	Arthropoda	Insecta	Hymenoptera	not specified	not specified	not specified	Hymenoptera	mixed	unknown	na	natural population of variable ages	not specified	Chronic toxicology	near Constantine, Michigan
35	5	Riddick et al. [a]	1998	Annals of the Entomological Society of America 91(5): 647-653	Effect of a seed-mix deployment of Cry3A-transgenic and nontransgenic potato on the abundance of Lebia grandis (Coleoptera: Carabidae) and Coleomegilla maculata (Coleoptera: Coccinellidae)	Academic & Government	United States Environmental Protection Agency	na	na	yes	United States	North America	yes	1	Field	Table 1	no	na	potato	Cry3A	Coleoptera	not specified	Russet Burbank	Russet Burbank	sampled throughout season	28.27	na	cited from EPA document	na	na	na	na	no	na	na	Arthropoda	Insecta	Coleoptera	Carabidae	Lebia	Lebia grandis	Lebia grandis	predator	Chewing	CMUE	natural population of variable ages	adult	Chronic toxicology	Maryland (Upper Marlboro, Beltsville, Ellicott City)
36	5	Riddick et al. [a]	1998	Annals of the Entomological Society of America 91(5): 647-653	Effect of a seed-mix deployment of Cry3A-transgenic and nontransgenic potato on the abundance of Lebia grandis (Coleoptera: Carabidae) and Coleomegilla maculata (Coleoptera: Coccinellidae)	Academic & Government	United States Environmental Protection Agency	na	na	yes	United States	North America	yes	1	Field	Table 1	no	na	potato	Cry3A	Coleoptera	not specified	Russet Burbank	Russet Burbank	sampled throughout season	28.27	na	cited from EPA document	na	na	na	na	no	na	na	Arthropoda	Insecta	Coleoptera	Coccinellidae	Coleomegilla	Coleomegilla maculata	Coleomegilla maculata	predator	Chewing	CMUE	natural population of variable ages	adult	Chronic toxicology	Maryland (Upper Marlboro, Beltsville, Ellicott City)
37	5	Riddick et al. [a]	1998	Annals of the Entomological Society of America 91(5): 647-653	Effect of a seed-mix deployment of Cry3A-transgenic and nontransgenic potato on the abundance of Lebia grandis (Coleoptera: Carabidae) and Coleomegilla maculata (Coleoptera: Coccinellidae)	Academic & Government	United States Environmental Protection Agency	na	na	yes	United States	North America	yes	1	Field	Table 1	no	na	potato	Cry3A	Coleoptera	not specified	Russet Burbank	Russet Burbank	sampled throughout season	28.27	na	cited from EPA document	na	na	na	na	no	na	na	Arthropoda	Insecta	Coleoptera	Carabidae	Lebia	Lebia grandis	Lebia grandis	predator	Chewing	CMUE	natural population of variable ages	adult	Chronic toxicology	Maryland (Upper Marlboro, Beltsville, Ellicott City)
38	5	Riddick et al. [a]	1998	Annals of the Entomological Society of America 91(5): 647-653	Effect of a seed-mix deployment of Cry3A-transgenic and nontransgenic potato on the abundance of Lebia grandis (Coleoptera: Carabidae) and Coleomegilla maculata (Coleoptera: Coccinellidae)	Academic & Government	United States Environmental Protection Agency	na	na	yes	United States	North America	yes	1	Field	Table 1	no	na	potato	Cry3A	Coleoptera	not specified	Russet Burbank	Russet Burbank	sampled throughout season	28.27	na	cited from EPA document	na	na	na	na	no	na	na	Arthropoda	Insecta	Coleoptera	Coccinellidae	Coleomegilla	Coleomegilla maculata	Coleomegilla maculata	predator	Chewing	CMUE	natural population of variable ages	adult	Chronic toxicology	Maryland (Upper Marlboro, Beltsville, Ellicott City)
39	5	Riddick et al. [a]	1998	Annals of the Entomological Society of America 91(5): 647-653	Effect of a seed-mix deployment of Cry3A-transgenic and nontransgenic potato on the abundance of Lebia grandis (Coleoptera: Carabidae) and Coleomegilla maculata (Coleoptera: Coccinellidae)	Academic & Government	United States Environmental Protection Agency	na	na	yes	United States	North America	yes	1	Field	Table 2	no	na	potato	Cry3A	Coleoptera	not specified	Russet Burbank	Russet Burbank	sampled throughout season	28.27	na	cited from EPA document	na	na	na	na	no	na	na	Arthropoda	Insecta	Coleoptera	Carabidae	Lebia	Lebia grandis	Lebia grandis	predator	Chewing	CMUE	natural population of variable ages	adult	Chronic toxicology	Maryland (Upper Marlboro, Beltsville, Ellicott City)
40	5	Riddick et al. [a]	1998	Annals of the Entomological Society of America 91(5): 647-653	Effect of a seed-mix deployment of Cry3A-transgenic and nontransgenic potato on the abundance of Lebia grandis (Coleoptera: Carabidae) and Coleomegilla maculata (Coleoptera: Coccinellidae)	Academic & Government	United States Environmental Protection Agency	na	na	yes	United States	North America	yes	1	Field	Table 2	no	na	potato	Cry3A	Coleoptera	not specified	Russet Burbank	Russet Burbank	sampled throughout season	28.27	na	cited from EPA document	na	na	na	na	no	na	na	Arthropoda	Insecta	Coleoptera	Coccinellidae	Coleomegilla	Coleomegilla maculata	Coleomegilla maculata	predator	Chewing	CMUE	natural population of variable ages	adult	Chronic toxicology	Maryland (Upper Marlboro, Beltsville, Ellicott City)
41	5	Riddick et al. [a]	1998	Annals of the Entomological Society of America 91(5): 647-653	Effect of a seed-mix deployment of Cry3A-transgenic and nontransgenic potato on the abundance of Lebia grandis (Coleoptera: Carabidae) and Coleomegilla maculata (Coleoptera: Coccinellidae)	Academic & Government	United States Environmental Protection Agency	na	na	yes	United States	North America	yes	1	Field	Table 3	no	na	potato	Cry3A	Coleoptera	not specified	Russet Burbank	Russet Burbank	sampled throughout season	28.27	na	cited from EPA document	na	na	na	na	no	na	na	Arthropoda	Insecta	Coleoptera	Carabidae	Lebia	Lebia grandis	Lebia grandis	predator	Chewing	CMUE	natural population of variable ages	adult	Chronic toxicology	Maryland (Upper Marlboro, Beltsville, Ellicott City)
42	5	Riddick et al. [a]	1998	Annals of the Entomological Society of America 91(5): 647-653	Effect of a seed-mix deployment of Cry3A-transgenic and nontransgenic potato on the abundance of Lebia grandis (Coleoptera: Carabidae) and Coleomegilla maculata (Coleoptera: Coccinellidae)	Academic & Government	United States Environmental Protection Agency	na	na	yes	United States	North America	yes	1	Field	Table 3	no	na	potato	Cry3A	Coleoptera	not specified	Russet Burbank	Russet Burbank	sampled throughout season	28.27	na	cited from EPA document	na	na	na	na	no	na	na	Arthropoda	Insecta	Coleoptera	Carabidae	Lebia	Lebia grandis	Lebia grandis	predator	Chewing	CMUE	natural population of variable ages	adult	Chronic toxicology	Maryland (Upper Marlboro, Beltsville, Ellicott City)
43	5	Riddick et al. [a]	1998	Annals of the Entomological Society of America 91(5): 647-653	Effect of a seed-mix deployment of Cry3A-transgenic and nontransgenic potato on the abundance of Lebia grandis (Coleoptera: Carabidae) and Coleomegilla maculata (Coleoptera: Coccinellidae)	Academic & Government	United States Environmental Protection Agency	na	na	yes	United States	North America	yes	1	Field	Table 4	no	na	potato	Cry3A	Coleoptera	not specified	Russet Burbank	Russet Burbank	sampled throughout season	28.27	na	cited from EPA document	na	na	na	na	no	na	na	Arthropoda	Insecta	Hemiptera	Cicadellidae	not specified	not specified	Cicadellidae	herbivore	Piercing	CMUE	natural population of variable ages	nymph & adult	Chronic toxicology	Maryland (Upper Marlboro, Beltsville, Ellicott City)
44	5	Riddick et al. [a]	1998	Annals of the Entomological Society of America 91(5): 647-653	Effect of a seed-mix deployment of Cry3A-transgenic and nontransgenic potato on the abundance of Lebia grandis (Coleoptera: Carabidae) and Coleomegilla maculata (Coleoptera: Coccinellidae)	Academic & Government	United States Environmental Protection Agency	na	na	yes	United States	North America	yes	1	Field	Table 4	no	na	potato	Cry3A	Coleoptera	not specified	Russet Burbank	Russet Burbank	sampled throughout season	28.27	na	cited from EPA document	na	na	na	na	no	na	na	Arthropoda	Insecta	Hemiptera	Cicadellidae	not specified	not specified	Cicadellidae	herbivore	Piercing	CMUE	natural population of variable ages	nymph & adult	Chronic toxicology	Maryland (Upper Marlboro, Beltsville, Ellicott City)
187	10	Pilcher et al. [a]	1997	Environmental Entomology 26(2): 446-454	Preimaginal development, survival, and field abundance of insect predators on transgenic Bacillus thuringiensis corn	Academic & Government	Department of Entomology, Iowa State University	na	na	yes	United States	North America	no	1	Field	Table 4	no	na	maize	Cry1Ab	Lepidoptera	Bt176	hybrid cross (CG00554 x CG00526)	not specified	throughout season; before, during and after pollen shed	not specified	na	na	na	na	na	na	no	na	na	Arthropoda	Insecta	Coleoptera	Coccinellidae	not specified	not specified	Coccinellidae	predator	Chewing	na	natural population composed of different stages	egg	Chronic toxicology	Ames, Iowa
188	10	Pilcher et al. [a]	1997	Environmental Entomology 26(2): 446-454	Preimaginal development, survival, and field abundance of insect predators on transgenic Bacillus thuringiensis corn	Academic & Government	Department of Entomology, Iowa State University	na	na	yes	United States	North America	no	1	Field	Table 4	no	na	maize	Cry1Ab	Lepidoptera	Bt176	hybrid cross (CG00554 x CG00526)	not specified	throughout season; before, during and after pollen shed	not specified	na	na	na	na	na	na	no	na	na	Arthropoda	Insecta	Coleoptera	Coccinellidae	not specified	not specified	Coccinellidae	predator	Chewing	na	natural population composed of different stages	larva	Chronic toxicology	Ames, Iowa
189	10	Pilcher et al. [a]	1997	Environmental Entomology 26(2): 446-454	Preimaginal development, survival, and field abundance of insect predators on transgenic Bacillus thuringiensis corn	Academic & Government	Department of Entomology, Iowa State University	na	na	yes	United States	North America	no	1	Field	Table 4	no	na	maize	Cry1Ab	Lepidoptera	Bt176	hybrid cross (CG00554 x CG00526)	not specified	throughout season; before, during and after pollen shed	not specified	na	na	na	na	na	na	no	na	na	Arthropoda	Insecta	Coleoptera	Coccinellidae	Coleomegilla	Coleomegilla maculata	Coleomegilla maculata	predator	Chewing	na	natural population composed of different stages	adult	Chronic toxicology	Ames, Iowa
190	10	Pilcher et al. [a]	1997	Environmental Entomology 26(2): 446-454	Preimaginal development, survival, and field abundance of insect predators on transgenic Bacillus thuringiensis corn	Academic & Government	Department of Entomology, Iowa State University	na	na	yes	United States	North America	no	1	Field	Table 4	no	na	maize	Cry1Ab	Lepidoptera	Bt176	hybrid cross (CG00554 x CG00526)	not specified	throughout season; before, during and after pollen shed	not specified	na	na	na	na	na	na	no	na	na	Arthropoda	Insecta	Coleoptera	Coccinellidae	Hippodamia	Hippodamia convergens	Hippodamia convergens	predator	Chewing	na	natural population composed of different stages	adult	Chronic toxicology	Ames, Iowa
191	10	Pilcher et al. [a]	1997	Environmental Entomology 26(2): 446-454	Preimaginal development, survival, and field abundance of insect predators on transgenic Bacillus thuringiensis corn	Academic & Government	Department of Entomology, Iowa State University	na	na	yes	United States	North America	no	1	Field	Table 4	no	na	maize	Cry1Ab	Lepidoptera	Bt176	hybrid cross (CG00554 x CG00526)	not specified	throughout season; before, during and after pollen shed	not specified	na	na	na	na	na	na	no	na	na	Arthropoda	Insecta	Neuroptera	Chrysopidae	not specified	not specified	Chrysopidae	predator	unknown	na	natural population composed of different stages	egg	Chronic toxicology	Ames, Iowa
192	10	Pilcher et al. [a]	1997	Environmental Entomology 26(2): 446-454	Preimaginal development, survival, and field abundance of insect predators on transgenic Bacillus thuringiensis corn	Academic & Government	Department of Entomology, Iowa State University	na	na	yes	United States	North America	no	1	Field	Table 4	no	na	maize	Cry1Ab	Lepidoptera	Bt176	hybrid cross (CG00554 x CG00526)	not specified	throughout season; before, during and after pollen shed	not specified	na	na	na	na	na	na	no	na	na	Arthropoda	Insecta	Neuroptera	Chrysopidae	not specified	not specified	Chrysopidae	predator	Piercing	na	natural population composed of different stages	larva	Chronic toxicology	Ames, Iowa
193	10	Pilcher et al. [a]	1997	Environmental Entomology 26(2): 446-454	Preimaginal development, survival, and field abundance of insect predators on transgenic Bacillus thuringiensis corn	Academic & Government	Department of Entomology, Iowa State University	na	na	yes	United States	North America	no	1	Field	Table 4	no	na	maize	Cry1Ab	Lepidoptera	Bt176	hybrid cross (CG00554 x CG00526)	not specified	throughout season; before, during and after pollen shed	not specified	na	na	na	na	na	na	no	na	na	Arthropoda	Insecta	Neuroptera	Chrysopidae	not specified	not specified	Chrysopidae	predator	unknown	na	natural population composed of different stages	adult	Chronic toxicology	Ames, Iowa
194	10	Pilcher et al. [a]	1997	Environmental Entomology 26(2): 446-454	Preimaginal development, survival, and field abundance of insect predators on transgenic Bacillus thuringiensis corn	Academic & Government	Department of Entomology, Iowa State University	na	na	yes	United States	North America	no	1	Field	Table 4	no	na	maize	Cry1Ab	Lepidoptera	Bt176	hybrid cross (CG00554 x CG00526)	not specified	throughout season; before, during and after pollen shed	not specified	na	na	na	na	na	na	no	na	na	Arthropoda	Insecta	Hemiptera	Anthocoridae	Orius	Orius insidiosus	Orius insidiosus	predator	Piercing	na	natural population composed of different stages	nymph & adult	Chronic toxicology	Ames, Iowa
195	10	Pilcher et al. [a]	1997	Environmental Entomology 26(2): 446-454	Preimaginal development, survival, and field abundance of insect predators on transgenic Bacillus thuringiensis corn	Academic & Government	Department of Entomology, Iowa State University	na	na	yes	United States	North America	no	1	Field	Table 4	no	na	maize	Cry1Ab	Lepidoptera	Bt176	hybrid cross (CG00554 x CG00526)	not specified	throughout season; before, during and after pollen shed	not specified	na	na	na	na	na	na	no	na	na	Arthropoda	Insecta	Hemiptera	Nabidae	not specified	not specified	Nabidae	predator	Piercing	na	natural population composed of different stages	adult	Chronic toxicology	Ames, Iowa
205	10	Pilcher et al. [a]	1997	Environmental Entomology 26(2): 446-454	Preimaginal development, survival, and field abundance of insect predators on transgenic Bacillus thuringiensis corn	Academic & Government	Department of Entomology, Iowa State University	na	na	yes	United States	North America	no	2	Field	Table 4	no	na	maize	Cry1Ab	Lepidoptera	MON810	not specified	not specified	throughout season; before, during and after pollen shed	10.34	na	cited from EPA document	na	na	na	na	no	na	na	Arthropoda	Insecta	Coleoptera	Coccinellidae	not specified	not specified	Coccinellidae	predator	Chewing	na	natural population composed of different stages	egg	Chronic toxicology	Woodruff farm, 2mi S. of Ames, Iowa
206	10	Pilcher et al. [a]	1997	Environmental Entomology 26(2): 446-454	Preimaginal development, survival, and field abundance of insect predators on transgenic Bacillus thuringiensis corn	Academic & Government	Department of Entomology, Iowa State University	na	na	yes	United States	North America	no	2	Field	Table 4	no	na	maize	Cry1Ab	Lepidoptera	MON810	not specified	not specified	throughout season; before, during and after pollen shed	10.34	na	cited from EPA document	na	na	na	na	no	na	na	Arthropoda	Insecta	Coleoptera	Coccinellidae	not specified	not specified	Coccinellidae	predator	Chewing	na	natural population composed of different stages	larva	Chronic toxicology	Woodruff farm, 2mi S. of Ames, Iowa
207	10	Pilcher et al. [a]	1997	Environmental Entomology 26(2): 446-454	Preimaginal development, survival, and field abundance of insect predators on transgenic Bacillus thuringiensis corn	Academic & Government	Department of Entomology, Iowa State University	na	na	yes	United States	North America	no	2	Field	Table 4	no	na	maize	Cry1Ab	Lepidoptera	MON810	not specified	not specified	throughout season; before, during and after pollen shed	10.34	na	cited from EPA document	na	na	na	na	no	na	na	Arthropoda	Insecta	Coleoptera	Coccinellidae	Coleomegilla	Coleomegilla maculata	Coleomegilla maculata	predator	Chewing	na	natural population composed of different stages	adult	Chronic toxicology	Woodruff farm, 2mi S. of Ames, Iowa
208	10	Pilcher et al. [a]	1997	Environmental Entomology 26(2): 446-454	Preimaginal development, survival, and field abundance of insect predators on transgenic Bacillus thuringiensis corn	Academic & Government	Department of Entomology, Iowa State University	na	na	yes	United States	North America	no	2	Field	Table 4	no	na	maize	Cry1Ab	Lepidoptera	MON810	not specified	not specified	throughout season; before, during and after pollen shed	10.34	na	cited from EPA document	na	na	na	na	no	na	na	Arthropoda	Insecta	Neuroptera	Chrysopidae	not specified	not specified	Chrysopidae	predator	Piercing	na	natural population composed of different stages	egg	Chronic toxicology	Woodruff farm, 2mi S. of Ames, Iowa
209	10	Pilcher et al. [a]	1997	Environmental Entomology 26(2): 446-454	Preimaginal development, survival, and field abundance of insect predators on transgenic Bacillus thuringiensis corn	Academic & Government	Department of Entomology, Iowa State University	na	na	yes	United States	North America	no	2	Field	Table 4	no	na	maize	Cry1Ab	Lepidoptera	MON810	not specified	not specified	throughout season; before, during and after pollen shed	10.34	na	cited from EPA document	na	na	na	na	no	na	na	Arthropoda	Insecta	Neuroptera	Chrysopidae	not specified	not specified	Chrysopidae	predator	unknown	na	natural population composed of different stages	larva	Chronic toxicology	Woodruff farm, 2mi S. of Ames, Iowa
210	10	Pilcher et al. [a]	1997	Environmental Entomology 26(2): 446-454	Preimaginal development, survival, and field abundance of insect predators on transgenic Bacillus thuringiensis corn	Academic & Government	Department of Entomology, Iowa State University	na	na	yes	United States	North America	no	2	Field	Table 4	no	na	maize	Cry1Ab	Lepidoptera	MON810	not specified	not specified	throughout season; before, during and after pollen shed	10.34	na	cited from EPA document	na	na	na	na	no	na	na	Arthropoda	Insecta	Neuroptera	Chrysopidae	not specified	not specified	Chrysopidae	predator	Chewing	na	natural population composed of different stages	adult	Chronic toxicology	Woodruff farm, 2mi S. of Ames, Iowa
211	10	Pilcher et al. [a]	1997	Environmental Entomology 26(2): 446-454	Preimaginal development, survival, and field abundance of insect predators on transgenic Bacillus thuringiensis corn	Academic & Government	Department of Entomology, Iowa State University	na	na	yes	United States	North America	no	2	Field	Table 4	no	na	maize	Cry1Ab	Lepidoptera	MON810	not specified	not specified	throughout season; before, during and after pollen shed	10.34	na	cited from EPA document	na	na	na	na	no	na	na	Arthropoda	Insecta	Hemiptera	Anthocoridae	Orius	Orius insidiosus	Orius insidiosus	predator	Piercing	na	natural population composed of different stages	nymph & adult	Chronic toxicology	Woodruff farm, 2mi S. of Ames, Iowa
212	10	Pilcher et al. [a]	1997	Environmental Entomology 26(2): 446-454	Preimaginal development, survival, and field abundance of insect predators on transgenic Bacillus thuringiensis corn	Academic & Government	Department of Entomology, Iowa State University	na	na	yes	United States	North America	no	2	Field	Table 4	no	na	maize	Cry1Ab	Lepidoptera	MON810	not specified	not specified	throughout season; before, during and after pollen shed	10.34	na	cited from EPA document	na	na	na	na	no	na	na	Arthropoda	Insecta	Hemiptera	Nabidae	not specified	not specified	Nabidae	predator	Piercing	na	natural population composed of different stages	adult	Chronic toxicology	Woodruff farm, 2mi S. of Ames, Iowa
213	10	Pilcher et al. [a]	1997	Environmental Entomology 26(2): 446-454	Preimaginal development, survival, and field abundance of insect predators on transgenic Bacillus thuringiensis corn	Academic & Government	Department of Entomology, Iowa State University	na	na	yes	United States	North America	no	2	Field	Table 4	no	na	maize	Cry1Ab	Lepidoptera	MON810	not specified	not specified	throughout season; before, during and after pollen shed	10.34	na	cited from EPA document	na	na	na	na	no	na	na	Arthropoda	Arachnida	Araneae	not specified	not specified	not specified	Araneae	predator	Piercing	na	natural population composed of different stages	not specified	Chronic toxicology	Woodruff farm, 2mi S. of Ames, Iowa
239	12	Head et al. [b]	2005	Environmental Entomology 34(5): 1257-1266	A multiyear, large-scale comparison of arthropod populations on commercially managed Bt and non-Bt cotton fields	Corporate & Academic	Monsanto Company	na	na	yes	United States	North America	yes	1	Field	Table 2	no	na	cotton	Cry1Ac	Lepidoptera	MON531/757/1076	Bollgard I	not specified	sampled throughout season	not specified	na	na	na	na	na	na	no	na	na	Arthropoda	Insecta	Hemiptera	Miridae	Lygus	not specified	Lygus	herbivore	Piercing	na	natural population of variable ages	nymph	Chronic toxicology	Georgia
240	12	Head et al. [b]	2005	Environmental Entomology 34(5): 1257-1266	A multiyear, large-scale comparison of arthropod populations on commercially managed Bt and non-Bt cotton fields	Corporate & Academic	Monsanto Company	na	na	yes	United States	North America	yes	1	Field	Table 2	no	na	cotton	Cry1Ac	Lepidoptera	MON531/757/1076	Bollgard I	not specified	sampled throughout season	not specified	na	na	na	na	na	na	no	na	na	Arthropoda	Insecta	Hemiptera	Miridae	Lygus	not specified	Lygus	herbivore	Piercing	na	natural population of variable ages	adult	Chronic toxicology	Georgia
241	12	Head et al. [b]	2005	Environmental Entomology 34(5): 1257-1266	A multiyear, large-scale comparison of arthropod populations on commercially managed Bt and non-Bt cotton fields	Corporate & Academic	Monsanto Company	na	na	yes	United States	North America	yes	1	Field	Table 2	no	na	cotton	Cry1Ac	Lepidoptera	MON531/757/1076	Bollgard I	not specified	sampled throughout season	not specified	na	na	na	na	na	na	no	na	na	Arthropoda	Insecta	Hemiptera	Pentatomidae	not specified	not specified	Pentatomidae	mixed	Piercing	na	natural population of variable ages	nymph & adult	Chronic toxicology	Georgia
242	12	Head et al. [b]	2005	Environmental Entomology 34(5): 1257-1266	A multiyear, large-scale comparison of arthropod populations on commercially managed Bt and non-Bt cotton fields	Corporate & Academic	Monsanto Company	na	na	yes	United States	North America	yes	1	Field	Table 2	no	na	cotton	Cry1Ac	Lepidoptera	MON531/757/1076	Bollgard I	not specified	sampled throughout season	not specified	na	na	na	na	na	na	no	na	na	Arthropoda	Insecta	Hemiptera	Miridae	Lygus	not specified	Lygus	herbivore	Piercing	na	natural population of variable ages	nymph	Chronic toxicology	South Carolina
243	12	Head et al. [b]	2005	Environmental Entomology 34(5): 1257-1266	A multiyear, large-scale comparison of arthropod populations on commercially managed Bt and non-Bt cotton fields	Corporate & Academic	Monsanto Company	na	na	yes	United States	North America	yes	1	Field	Table 3	no	na	cotton	Cry1Ac	Lepidoptera	MON531/757/1076	Bollgard I	not specified	sampled throughout season	not specified	na	na	na	na	na	na	no	na	na	Arthropoda	Insecta	Hemiptera	Geocoridae	Geocoris	not specified	Geocoris	predator	Piercing	na	natural population of variable ages	nymph	Chronic toxicology	Georgia
244	12	Head et al. [b]	2005	Environmental Entomology 34(5): 1257-1266	A multiyear, large-scale comparison of arthropod populations on commercially managed Bt and non-Bt cotton fields	Corporate & Academic	Monsanto Company	na	na	yes	United States	North America	yes	1	Field	Table 3	no	na	cotton	Cry1Ac	Lepidoptera	MON531/757/1076	Bollgard I	not specified	sampled throughout season	not specified	na	na	na	na	na	na	no	na	na	Arthropoda	Insecta	Hemiptera	Geocoridae	Geocoris	not specified	Geocoris	predator	Piercing	na	natural population of variable ages	adult	Chronic toxicology	Georgia
245	12	Head et al. [b]	2005	Environmental Entomology 34(5): 1257-1266	A multiyear, large-scale comparison of arthropod populations on commercially managed Bt and non-Bt cotton fields	Corporate & Academic	Monsanto Company	na	na	yes	United States	North America	yes	1	Field	Table 3	no	na	cotton	Cry1Ac	Lepidoptera	MON531/757/1076	Bollgard I	not specified	sampled throughout season	not specified	na	na	na	na	na	na	no	na	na	Arthropoda	Insecta	Hemiptera	Anthocoridae	Orius	not specified	Orius	predator	Piercing	na	natural population of variable ages	nymph & adult	Chronic toxicology	Georgia
246	12	Head et al. [b]	2005	Environmental Entomology 34(5): 1257-1266	A multiyear, large-scale comparison of arthropod populations on commercially managed Bt and non-Bt cotton fields	Corporate & Academic	Monsanto Company	na	na	yes	United States	North America	yes	1	Field	Table 3	no	na	cotton	Cry1Ac	Lepidoptera	MON531/757/1076	Bollgard I	not specified	sampled throughout season	not specified	na	na	na	na	na	na	no	na	na	Arthropoda	Insecta	Hemiptera	Nabidae	Nabis	not specified	Nabis	predator	Piercing	na	natural population of variable ages	not specified	Chronic toxicology	Georgia
247	12	Head et al. [b]	2005	Environmental Entomology 34(5): 1257-1266	A multiyear, large-scale comparison of arthropod populations on commercially managed Bt and non-Bt cotton fields	Corporate & Academic	Monsanto Company	na	na	yes	United States	North America	yes	1	Field	Table 3	no	na	cotton	Cry1Ac	Lepidoptera	MON531/757/1076	Bollgard I	not specified	sampled throughout season	not specified	na	na	na	na	na	na	no	na	na	Arthropoda	Insecta	Neuroptera	Chrysopidae & Hemerobidae	not specified	not specified	Chrysopidae & Hemerobidae	predator	Piercing	na	natural population of variable ages	larva	Chronic toxicology	Georgia
248	12	Head et al. [b]	2005	Environmental Entomology 34(5): 1257-1266	A multiyear, large-scale comparison of arthropod populations on commercially managed Bt and non-Bt cotton fields	Corporate & Academic	Monsanto Company	na	na	yes	United States	North America	yes	1	Field	Table 3	no	na	cotton	Cry1Ac	Lepidoptera	MON531/757/1076	Bollgard I	not specified	sampled throughout season	not specified	na	na	na	na	na	na	no	na	na	Arthropoda	Insecta	Coleoptera	Coccinellidae	not specified	not specified	Coccinellidae	predator	Chewing	na	natural population of variable ages	larva	Chronic toxicology	Georgia
249	12	Head et al. [b]	2005	Environmental Entomology 34(5): 1257-1266	A multiyear, large-scale comparison of arthropod populations on commercially managed Bt and non-Bt cotton fields	Corporate & Academic	Monsanto Company	na	na	yes	United States	North America	yes	1	Field	Table 3	no	na	cotton	Cry1Ac	Lepidoptera	MON531/757/1076	Bollgard I	not specified	sampled throughout season	not specified	na	na	na	na	na	na	no	na	na	Arthropoda	Insecta	Coleoptera	Coccinellidae	not specified	not specified	Coccinellidae	predator	Chewing	na	natural population of variable ages	adult	Chronic toxicology	Georgia
250	12	Head et al. [b]	2005	Environmental Entomology 34(5): 1257-1266	A multiyear, large-scale comparison of arthropod populations on commercially managed Bt and non-Bt cotton fields	Corporate & Academic	Monsanto Company	na	na	yes	United States	North America	yes	1	Field	Table 3	no	na	cotton	Cry1Ac	Lepidoptera	MON531/757/1076	Bollgard I	not specified	sampled throughout season	not specified	na	na	na	na	na	na	no	na	na	Arthropoda	Insecta	Hymenoptera	Formicidae	Solenopsis	Solenopsis invicta	Solenopsis invicta	omnivore	Mandibulate-sucking	na	natural population of variable ages	not specified	Chronic toxicology	Georgia
251	12	Head et al. [b]	2005	Environmental Entomology 34(5): 1257-1266	A multiyear, large-scale comparison of arthropod populations on commercially managed Bt and non-Bt cotton fields	Corporate & Academic	Monsanto Company	na	na	yes	United States	North America	yes	1	Field	Table 3	no	na	cotton	Cry1Ac	Lepidoptera	MON531/757/1076	Bollgard I	not specified	sampled throughout season	not specified	na	na	na	na	na	na	no	na	na	Arthropoda	Arachnida	Araneae	not specified	not specified	not specified	Araneae	predator	Piercing	na	natural population of variable ages	not specified	Chronic toxicology	Georgia
252	12	Head et al. [b]	2005	Environmental Entomology 34(5): 1257-1266	A multiyear, large-scale comparison of arthropod populations on commercially managed Bt and non-Bt cotton fields	Corporate & Academic	Monsanto Company	na	na	yes	United States	North America	yes	2	Field	Table 2	no	na	cotton	Cry1Ac	Lepidoptera	MON531/757/1076	Bollgard I	not specified	sampled throughout season	not specified	na	na	na	na	na	na	no	na	na	Arthropoda	Insecta	Hemiptera	Miridae	Lygus	not specified	Lygus	herbivore	Piercing	na	natural population of variable ages	nymph	Chronic toxicology	North Alabama
253	12	Head et al. [b]	2005	Environmental Entomology 34(5): 1257-1266	A multiyear, large-scale comparison of arthropod populations on commercially managed Bt and non-Bt cotton fields	Corporate & Academic	Monsanto Company	na	na	yes	United States	North America	yes	2	Field	Table 2	no	na	cotton	Cry1Ac	Lepidoptera	MON531/757/1076	Bollgard I	not specified	sampled throughout season	not specified	na	na	na	na	na	na	no	na	na	Arthropoda	Insecta	Hemiptera	Miridae	Lygus	not specified	Lygus	herbivore	Piercing	na	natural population of variable ages	adult	Chronic toxicology	North Alabama
254	12	Head et al. [b]	2005	Environmental Entomology 34(5): 1257-1266	A multiyear, large-scale comparison of arthropod populations on commercially managed Bt and non-Bt cotton fields	Corporate & Academic	Monsanto Company	na	na	yes	United States	North America	yes	2	Field	Table 2	no	na	cotton	Cry1Ac	Lepidoptera	MON531/757/1076	Bollgard I	not specified	sampled throughout season	not specified	na	na	na	na	na	na	no	na	na	Arthropoda	Insecta	Hemiptera	Pentatomidae	not specified	not specified	Pentatomidae	mixed	Piercing	na	natural population of variable ages	nymph	Chronic toxicology	North Alabama
255	12	Head et al. [b]	2005	Environmental Entomology 34(5): 1257-1266	A multiyear, large-scale comparison of arthropod populations on commercially managed Bt and non-Bt cotton fields	Corporate & Academic	Monsanto Company	na	na	yes	United States	North America	yes	2	Field	Table 2	no	na	cotton	Cry1Ac	Lepidoptera	MON531/757/1076	Bollgard I	not specified	sampled throughout season	not specified	na	na	na	na	na	na	no	na	na	Arthropoda	Insecta	Hemiptera	Pentatomidae	not specified	not specified	Pentatomidae	mixed	Piercing	na	natural population of variable ages	adult	Chronic toxicology	North Alabama
256	12	Head et al. [b]	2005	Environmental Entomology 34(5): 1257-1266	A multiyear, large-scale comparison of arthropod populations on commercially managed Bt and non-Bt cotton fields	Corporate & Academic	Monsanto Company	na	na	yes	United States	North America	yes	2	Field	Table 3	no	na	cotton	Cry1Ac	Lepidoptera	MON531/757/1076	Bollgard I	not specified	sampled throughout season	not specified	na	na	na	na	na	na	no	na	na	Arthropoda	Insecta	Hemiptera	Geocoridae	Geocoris	not specified	Geocoris	predator	Piercing	na	natural population of variable ages	nymph	Chronic toxicology	North Alabama
257	12	Head et al. [b]	2005	Environmental Entomology 34(5): 1257-1266	A multiyear, large-scale comparison of arthropod populations on commercially managed Bt and non-Bt cotton fields	Corporate & Academic	Monsanto Company	na	na	yes	United States	North America	yes	2	Field	Table 3	no	na	cotton	Cry1Ac	Lepidoptera	MON531/757/1076	Bollgard I	not specified	sampled throughout season	not specified	na	na	na	na	na	na	no	na	na	Arthropoda	Insecta	Hemiptera	Geocoridae	Geocoris	not specified	Geocoris	predator	Piercing	na	natural population of variable ages	adult	Chronic toxicology	North Alabama
258	12	Head et al. [b]	2005	Environmental Entomology 34(5): 1257-1266	A multiyear, large-scale comparison of arthropod populations on commercially managed Bt and non-Bt cotton fields	Corporate & Academic	Monsanto Company	na	na	yes	United States	North America	yes	2	Field	Table 3	no	na	cotton	Cry1Ac	Lepidoptera	MON531/757/1076	Bollgard I	not specified	sampled throughout season	not specified	na	na	na	na	na	na	no	na	na	Arthropoda	Insecta	Hemiptera	Anthocoridae	Orius	not specified	Orius	predator	Piercing	na	natural population of variable ages	nymph & adult	Chronic toxicology	North Alabama
259	12	Head et al. [b]	2005	Environmental Entomology 34(5): 1257-1266	A multiyear, large-scale comparison of arthropod populations on commercially managed Bt and non-Bt cotton fields	Corporate & Academic	Monsanto Company	na	na	yes	United States	North America	yes	2	Field	Table 3	no	na	cotton	Cry1Ac	Lepidoptera	MON531/757/1076	Bollgard I	not specified	sampled throughout season	not specified	na	na	na	na	na	na	no	na	na	Arthropoda	Insecta	Hemiptera	Nabidae	Nabis	not specified	Nabis	predator	Piercing	na	natural population of variable ages	not specified	Chronic toxicology	North Alabama
260	12	Head et al. [b]	2005	Environmental Entomology 34(5): 1257-1266	A multiyear, large-scale comparison of arthropod populations on commercially managed Bt and non-Bt cotton fields	Corporate & Academic	Monsanto Company	na	na	yes	United States	North America	yes	2	Field	Table 3	no	na	cotton	Cry1Ac	Lepidoptera	MON531/757/1076	Bollgard I	not specified	sampled throughout season	not specified	na	na	na	na	na	na	no	na	na	Arthropoda	Insecta	Neuroptera	Chrysopidae & Hemerobidae	not specified	not specified	Chrysopidae & Hemerobidae	predator	Piercing	na	natural population of variable ages	larva	Chronic toxicology	North Alabama
261	12	Head et al. [b]	2005	Environmental Entomology 34(5): 1257-1266	A multiyear, large-scale comparison of arthropod populations on commercially managed Bt and non-Bt cotton fields	Corporate & Academic	Monsanto Company	na	na	yes	United States	North America	yes	2	Field	Table 3	no	na	cotton	Cry1Ac	Lepidoptera	MON531/757/1076	Bollgard I	not specified	sampled throughout season	not specified	na	na	na	na	na	na	no	na	na	Arthropoda	Insecta	Neuroptera	Chrysopidae & Hemerobidae	not specified	not specified	Chrysopidae & Hemerobidae	predator	Chewing	na	natural population of variable ages	adult	Chronic toxicology	North Alabama
262	12	Head et al. [b]	2005	Environmental Entomology 34(5): 1257-1266	A multiyear, large-scale comparison of arthropod populations on commercially managed Bt and non-Bt cotton fields	Corporate & Academic	Monsanto Company	na	na	yes	United States	North America	yes	2	Field	Table 3	no	na	cotton	Cry1Ac	Lepidoptera	MON531/757/1076	Bollgard I	not specified	sampled throughout season	not specified	na	na	na	na	na	na	no	na	na	Arthropoda	Insecta	Coleoptera	Coccinellidae	not specified	not specified	Coccinellidae	predator	Chewing	na	natural population of variable ages	larva	Chronic toxicology	North Alabama
263	12	Head et al. [b]	2005	Environmental Entomology 34(5): 1257-1266	A multiyear, large-scale comparison of arthropod populations on commercially managed Bt and non-Bt cotton fields	Corporate & Academic	Monsanto Company	na	na	yes	United States	North America	yes	2	Field	Table 3	no	na	cotton	Cry1Ac	Lepidoptera	MON531/757/1076	Bollgard I	not specified	sampled throughout season	not specified	na	na	na	na	na	na	no	na	na	Arthropoda	Insecta	Coleoptera	Coccinellidae	not specified	not specified	Coccinellidae	predator	Chewing	na	natural population of variable ages	adult	Chronic toxicology	North Alabama
264	12	Head et al. [b]	2005	Environmental Entomology 34(5): 1257-1266	A multiyear, large-scale comparison of arthropod populations on commercially managed Bt and non-Bt cotton fields	Corporate & Academic	Monsanto Company	na	na	yes	United States	North America	yes	2	Field	Table 3	no	na	cotton	Cry1Ac	Lepidoptera	MON531/757/1076	Bollgard I	not specified	sampled throughout season	not specified	na	na	na	na	na	na	no	na	na	Arthropoda	Insecta	Hymenoptera	Formicidae	Solenopsis	Solenopsis invicta	Solenopsis invicta	omnivore	Mandibulate-sucking	na	natural population of variable ages	not specified	Chronic toxicology	North Alabama
265	12	Head et al. [b]	2005	Environmental Entomology 34(5): 1257-1266	A multiyear, large-scale comparison of arthropod populations on commercially managed Bt and non-Bt cotton fields	Corporate & Academic	Monsanto Company	na	na	yes	United States	North America	yes	2	Field	Table 3	no	na	cotton	Cry1Ac	Lepidoptera	MON531/757/1076	Bollgard I	not specified	sampled throughout season	not specified	na	na	na	na	na	na	no	na	na	Arthropoda	Arachnida	Araneae	not specified	not specified	not specified	Araneae	predator	Piercing	na	natural population of variable ages	not specified	Chronic toxicology	North Alabama
269	12	Head et al. [b]	2005	Environmental Entomology 34(5): 1257-1266	A multiyear, large-scale comparison of arthropod populations on commercially managed Bt and non-Bt cotton fields	Corporate & Academic	Monsanto Company	na	na	yes	United States	North America	yes	3	Field	Table 2	no	na	cotton	Cry1Ac	Lepidoptera	MON531/757/1076	Bollgard I	not specified	sampled throughout season	not specified	na	na	na	na	na	na	no	na	na	Arthropoda	Insecta	Hemiptera	Pentatomidae	not specified	not specified	Pentatomidae	mixed	Piercing	na	natural population of variable ages	adult	Chronic toxicology	South Alabama
271	12	Head et al. [b]	2005	Environmental Entomology 34(5): 1257-1266	A multiyear, large-scale comparison of arthropod populations on commercially managed Bt and non-Bt cotton fields	Corporate & Academic	Monsanto Company	na	na	yes	United States	North America	yes	3	Field	Table 3	no	na	cotton	Cry1Ac	Lepidoptera	MON531/757/1076	Bollgard I	not specified	sampled throughout season	not specified	na	na	na	na	na	na	no	na	na	Arthropoda	Insecta	Hemiptera	Geocoridae	Geocoris	not specified	Geocoris	predator	Piercing	na	natural population of variable ages	adult	Chronic toxicology	South Alabama
275	12	Head et al. [b]	2005	Environmental Entomology 34(5): 1257-1266	A multiyear, large-scale comparison of arthropod populations on commercially managed Bt and non-Bt cotton fields	Corporate & Academic	Monsanto Company	na	na	yes	United States	North America	yes	3	Field	Table 3	no	na	cotton	Cry1Ac	Lepidoptera	MON531/757/1076	Bollgard I	not specified	sampled throughout season	not specified	na	na	na	na	na	na	no	na	na	Arthropoda	Insecta	Coleoptera	Coccinellidae	not specified	not specified	Coccinellidae	predator	Chewing	na	natural population of variable ages	larva	Chronic toxicology	South Alabama
276	12	Head et al. [b]	2005	Environmental Entomology 34(5): 1257-1266	A multiyear, large-scale comparison of arthropod populations on commercially managed Bt and non-Bt cotton fields	Corporate & Academic	Monsanto Company	na	na	yes	United States	North America	yes	3	Field	Table 3	no	na	cotton	Cry1Ac	Lepidoptera	MON531/757/1076	Bollgard I	not specified	sampled throughout season	not specified	na	na	na	na	na	na	no	na	na	Arthropoda	Insecta	Coleoptera	Coccinellidae	not specified	not specified	Coccinellidae	predator	Chewing	na	natural population of variable ages	adult	Chronic toxicology	South Alabama
277	12	Head et al. [b]	2005	Environmental Entomology 34(5): 1257-1266	A multiyear, large-scale comparison of arthropod populations on commercially managed Bt and non-Bt cotton fields	Corporate & Academic	Monsanto Company	na	na	yes	United States	North America	yes	3	Field	Table 3	no	na	cotton	Cry1Ac	Lepidoptera	MON531/757/1076	Bollgard I	not specified	sampled throughout season	not specified	na	na	na	na	na	na	no	na	na	Arthropoda	Insecta	Hymenoptera	Formicidae	Solenopsis	Solenopsis invicta	Solenopsis invicta	omnivore	Mandibulate-sucking	na	natural population of variable ages	not specified	Chronic toxicology	South Alabama
278	12	Head et al. [b]	2005	Environmental Entomology 34(5): 1257-1266	A multiyear, large-scale comparison of arthropod populations on commercially managed Bt and non-Bt cotton fields	Corporate & Academic	Monsanto Company	na	na	yes	United States	North America	yes	3	Field	Table 3	no	na	cotton	Cry1Ac	Lepidoptera	MON531/757/1076	Bollgard I	not specified	sampled throughout season	not specified	na	na	na	na	na	na	no	na	na	Arthropoda	Arachnida	Araneae	not specified	not specified	not specified	Araneae	predator	Piercing	na	natural population of variable ages	not specified	Chronic toxicology	South Alabama
279	12	Head et al. [b]	2005	Environmental Entomology 34(5): 1257-1266	A multiyear, large-scale comparison of arthropod populations on commercially managed Bt and non-Bt cotton fields	Corporate & Academic	Monsanto Company	na	na	yes	United States	North America	yes	4	Field	Table 2	no	na	cotton	Cry1Ac	Lepidoptera	MON531/757/1076	Bollgard I	not specified	sampled throughout season	not specified	na	na	na	na	na	na	no	na	na	Arthropoda	Insecta	Hemiptera	Miridae	Lygus	not specified	Lygus	herbivore	Piercing	na	natural population of variable ages	nymph	Chronic toxicology	South Carolina
280	12	Head et al. [b]	2005	Environmental Entomology 34(5): 1257-1266	A multiyear, large-scale comparison of arthropod populations on commercially managed Bt and non-Bt cotton fields	Corporate & Academic	Monsanto Company	na	na	yes	United States	North America	yes	4	Field	Table 2	no	na	cotton	Cry1Ac	Lepidoptera	MON531/757/1076	Bollgard I	not specified	sampled throughout season	not specified	na	na	na	na	na	na	no	na	na	Arthropoda	Insecta	Hemiptera	Miridae	Lygus	not specified	Lygus	herbivore	Piercing	na	natural population of variable ages	adult	Chronic toxicology	South Carolina
281	12	Head et al. [b]	2005	Environmental Entomology 34(5): 1257-1266	A multiyear, large-scale comparison of arthropod populations on commercially managed Bt and non-Bt cotton fields	Corporate & Academic	Monsanto Company	na	na	yes	United States	North America	yes	4	Field	Table 2	no	na	cotton	Cry1Ac	Lepidoptera	MON531/757/1076	Bollgard I	not specified	sampled throughout season	not specified	na	na	na	na	na	na	no	na	na	Arthropoda	Insecta	Hemiptera	Pentatomidae	not specified	not specified	Pentatomidae	mixed	Piercing	na	natural population of variable ages	adult	Chronic toxicology	South Carolina
282	12	Head et al. [b]	2005	Environmental Entomology 34(5): 1257-1266	A multiyear, large-scale comparison of arthropod populations on commercially managed Bt and non-Bt cotton fields	Corporate & Academic	Monsanto Company	na	na	yes	United States	North America	yes	4	Field	Table 3	no	na	cotton	Cry1Ac	Lepidoptera	MON531/757/1076	Bollgard I	not specified	sampled throughout season	not specified	na	na	na	na	na	na	no	na	na	Arthropoda	Insecta	Hemiptera	Geocoridae	Geocoris	not specified	Geocoris	predator	Piercing	na	natural population of variable ages	nymph	Chronic toxicology	South Carolina
283	12	Head et al. [b]	2005	Environmental Entomology 34(5): 1257-1266	A multiyear, large-scale comparison of arthropod populations on commercially managed Bt and non-Bt cotton fields	Corporate & Academic	Monsanto Company	na	na	yes	United States	North America	yes	4	Field	Table 3	no	na	cotton	Cry1Ac	Lepidoptera	MON531/757/1076	Bollgard I	not specified	sampled throughout season	not specified	na	na	na	na	na	na	no	na	na	Arthropoda	Insecta	Hemiptera	Geocoridae	Geocoris	not specified	Geocoris	predator	Piercing	na	natural population of variable ages	adult	Chronic toxicology	South Carolina
284	12	Head et al. [b]	2005	Environmental Entomology 34(5): 1257-1266	A multiyear, large-scale comparison of arthropod populations on commercially managed Bt and non-Bt cotton fields	Corporate & Academic	Monsanto Company	na	na	yes	United States	North America	yes	4	Field	Table 3	no	na	cotton	Cry1Ac	Lepidoptera	MON531/757/1076	Bollgard I	not specified	sampled throughout season	not specified	na	na	na	na	na	na	no	na	na	Arthropoda	Insecta	Hemiptera	Anthocoridae	Orius	not specified	Orius	predator	Piercing	na	natural population of variable ages	nymph & adult	Chronic toxicology	South Carolina
285	12	Head et al. [b]	2005	Environmental Entomology 34(5): 1257-1266	A multiyear, large-scale comparison of arthropod populations on commercially managed Bt and non-Bt cotton fields	Corporate & Academic	Monsanto Company	na	na	yes	United States	North America	yes	4	Field	Table 3	no	na	cotton	Cry1Ac	Lepidoptera	MON531/757/1076	Bollgard I	not specified	sampled throughout season	not specified	na	na	na	na	na	na	no	na	na	Arthropoda	Insecta	Hemiptera	Nabidae	Nabis	not specified	Nabis	predator	Piercing	na	natural population of variable ages	not specified	Chronic toxicology	South Carolina
286	12	Head et al. [b]	2005	Environmental Entomology 34(5): 1257-1266	A multiyear, large-scale comparison of arthropod populations on commercially managed Bt and non-Bt cotton fields	Corporate & Academic	Monsanto Company	na	na	yes	United States	North America	yes	4	Field	Table 3	no	na	cotton	Cry1Ac	Lepidoptera	MON531/757/1076	Bollgard I	not specified	sampled throughout season	not specified	na	na	na	na	na	na	no	na	na	Arthropoda	Insecta	Neuroptera	Chrysopidae & Hemerobidae	not specified	not specified	Chrysopidae & Hemerobidae	predator	Piercing	na	natural population of variable ages	larva	Chronic toxicology	South Carolina
287	12	Head et al. [b]	2005	Environmental Entomology 34(5): 1257-1266	A multiyear, large-scale comparison of arthropod populations on commercially managed Bt and non-Bt cotton fields	Corporate & Academic	Monsanto Company	na	na	yes	United States	North America	yes	4	Field	Table 3	no	na	cotton	Cry1Ac	Lepidoptera	MON531/757/1076	Bollgard I	not specified	sampled throughout season	not specified	na	na	na	na	na	na	no	na	na	Arthropoda	Insecta	Neuroptera	Chrysopidae & Hemerobidae	not specified	not specified	Chrysopidae & Hemerobidae	predator	Chewing	na	natural population of variable ages	adult	Chronic toxicology	South Carolina
288	12	Head et al. [b]	2005	Environmental Entomology 34(5): 1257-1266	A multiyear, large-scale comparison of arthropod populations on commercially managed Bt and non-Bt cotton fields	Corporate & Academic	Monsanto Company	na	na	yes	United States	North America	yes	4	Field	Table 3	no	na	cotton	Cry1Ac	Lepidoptera	MON531/757/1076	Bollgard I	not specified	sampled throughout season	not specified	na	na	na	na	na	na	no	na	na	Arthropoda	Insecta	Coleoptera	Coccinellidae	not specified	not specified	Coccinellidae	predator	Chewing	na	natural population of variable ages	larva	Chronic toxicology	South Carolina
289	12	Head et al. [b]	2005	Environmental Entomology 34(5): 1257-1266	A multiyear, large-scale comparison of arthropod populations on commercially managed Bt and non-Bt cotton fields	Corporate & Academic	Monsanto Company	na	na	yes	United States	North America	yes	4	Field	Table 3	no	na	cotton	Cry1Ac	Lepidoptera	MON531/757/1076	Bollgard I	not specified	sampled throughout season	not specified	na	na	na	na	na	na	no	na	na	Arthropoda	Insecta	Coleoptera	Coccinellidae	not specified	not specified	Coccinellidae	predator	Chewing	na	natural population of variable ages	adult	Chronic toxicology	South Carolina
290	12	Head et al. [b]	2005	Environmental Entomology 34(5): 1257-1266	A multiyear, large-scale comparison of arthropod populations on commercially managed Bt and non-Bt cotton fields	Corporate & Academic	Monsanto Company	na	na	yes	United States	North America	yes	4	Field	Table 3	no	na	cotton	Cry1Ac	Lepidoptera	MON531/757/1076	Bollgard I	not specified	sampled throughout season	not specified	na	na	na	na	na	na	no	na	na	Arthropoda	Insecta	Hymenoptera	Formicidae	Solenopsis	Solenopsis invicta	Solenopsis invicta	omnivore	Mandibulate-sucking	na	natural population of variable ages	not specified	Chronic toxicology	South Carolina
291	12	Head et al. [b]	2005	Environmental Entomology 34(5): 1257-1266	A multiyear, large-scale comparison of arthropod populations on commercially managed Bt and non-Bt cotton fields	Corporate & Academic	Monsanto Company	na	na	yes	United States	North America	yes	4	Field	Table 3	no	na	cotton	Cry1Ac	Lepidoptera	MON531/757/1076	Bollgard I	not specified	sampled throughout season	not specified	na	na	na	na	na	na	no	na	na	Arthropoda	Arachnida	Araneae	not specified	not specified	not specified	Araneae	predator	Piercing	na	natural population of variable ages	not specified	Chronic toxicology	South Carolina
292	12	Head et al. [b]	2005	Environmental Entomology 34(5): 1257-1266	A multiyear, large-scale comparison of arthropod populations on commercially managed Bt and non-Bt cotton fields	Corporate & Academic	Monsanto Company	na	na	yes	United States	North America	yes	5	Field	Table 2	no	na	cotton	Cry1Ac	Lepidoptera	MON531/757/1076	Bollgard I	not specified	sampled throughout season	not specified	na	na	na	na	na	na	no	na	na	Arthropoda	Insecta	Hemiptera	Miridae	Lygus	not specified	Lygus	herbivore	Piercing	na	natural population of variable ages	nymph	Chronic toxicology	Georgia
293	12	Head et al. [b]	2005	Environmental Entomology 34(5): 1257-1266	A multiyear, large-scale comparison of arthropod populations on commercially managed Bt and non-Bt cotton fields	Corporate & Academic	Monsanto Company	na	na	yes	United States	North America	yes	5	Field	Table 2	no	na	cotton	Cry1Ac	Lepidoptera	MON531/757/1076	Bollgard I	not specified	sampled throughout season	not specified	na	na	na	na	na	na	no	na	na	Arthropoda	Insecta	Hemiptera	Miridae	Lygus	not specified	Lygus	herbivore	Piercing	na	natural population of variable ages	adult	Chronic toxicology	Georgia
294	12	Head et al. [b]	2005	Environmental Entomology 34(5): 1257-1266	A multiyear, large-scale comparison of arthropod populations on commercially managed Bt and non-Bt cotton fields	Corporate & Academic	Monsanto Company	na	na	yes	United States	North America	yes	5	Field	Table 2	no	na	cotton	Cry1Ac	Lepidoptera	MON531/757/1076	Bollgard I	not specified	sampled throughout season	not specified	na	na	na	na	na	na	no	na	na	Arthropoda	Insecta	Hemiptera	Pentatomidae	not specified	not specified	Pentatomidae	mixed	Piercing	na	natural population of variable ages	nymph & adult	Chronic toxicology	Georgia
295	12	Head et al. [b]	2005	Environmental Entomology 34(5): 1257-1266	A multiyear, large-scale comparison of arthropod populations on commercially managed Bt and non-Bt cotton fields	Corporate & Academic	Monsanto Company	na	na	yes	United States	North America	yes	5	Field	Table 3	no	na	cotton	Cry1Ac	Lepidoptera	MON531/757/1076	Bollgard I	not specified	sampled throughout season	not specified	na	na	na	na	na	na	no	na	na	Arthropoda	Insecta	Hemiptera	Geocoridae	Geocoris	not specified	Geocoris	predator	Piercing	na	natural population of variable ages	nymph	Chronic toxicology	Georgia
296	12	Head et al. [b]	2005	Environmental Entomology 34(5): 1257-1266	A multiyear, large-scale comparison of arthropod populations on commercially managed Bt and non-Bt cotton fields	Corporate & Academic	Monsanto Company	na	na	yes	United States	North America	yes	5	Field	Table 3	no	na	cotton	Cry1Ac	Lepidoptera	MON531/757/1076	Bollgard I	not specified	sampled throughout season	not specified	na	na	na	na	na	na	no	na	na	Arthropoda	Insecta	Hemiptera	Geocoridae	Geocoris	not specified	Geocoris	predator	Piercing	na	natural population of variable ages	adult	Chronic toxicology	Georgia
297	12	Head et al. [b]	2005	Environmental Entomology 34(5): 1257-1266	A multiyear, large-scale comparison of arthropod populations on commercially managed Bt and non-Bt cotton fields	Corporate & Academic	Monsanto Company	na	na	yes	United States	North America	yes	5	Field	Table 3	no	na	cotton	Cry1Ac	Lepidoptera	MON531/757/1076	Bollgard I	not specified	sampled throughout season	not specified	na	na	na	na	na	na	no	na	na	Arthropoda	Insecta	Hemiptera	Anthocoridae	Orius	not specified	Orius	predator	Piercing	na	natural population of variable ages	nymph & adult	Chronic toxicology	Georgia
298	12	Head et al. [b]	2005	Environmental Entomology 34(5): 1257-1266	A multiyear, large-scale comparison of arthropod populations on commercially managed Bt and non-Bt cotton fields	Corporate & Academic	Monsanto Company	na	na	yes	United States	North America	yes	5	Field	Table 3	no	na	cotton	Cry1Ac	Lepidoptera	MON531/757/1076	Bollgard I	not specified	sampled throughout season	not specified	na	na	na	na	na	na	no	na	na	Arthropoda	Insecta	Hemiptera	Nabidae	Nabis	not specified	Nabis	predator	Piercing	na	natural population of variable ages	not specified	Chronic toxicology	Georgia
299	12	Head et al. [b]	2005	Environmental Entomology 34(5): 1257-1266	A multiyear, large-scale comparison of arthropod populations on commercially managed Bt and non-Bt cotton fields	Corporate & Academic	Monsanto Company	na	na	yes	United States	North America	yes	5	Field	Table 3	no	na	cotton	Cry1Ac	Lepidoptera	MON531/757/1076	Bollgard I	not specified	sampled throughout season	not specified	na	na	na	na	na	na	no	na	na	Arthropoda	Insecta	Neuroptera	Chrysopidae & Hemerobidae	not specified	not specified	Chrysopidae & Hemerobidae	predator	Piercing	na	natural population of variable ages	larva	Chronic toxicology	Georgia
300	12	Head et al. [b]	2005	Environmental Entomology 34(5): 1257-1266	A multiyear, large-scale comparison of arthropod populations on commercially managed Bt and non-Bt cotton fields	Corporate & Academic	Monsanto Company	na	na	yes	United States	North America	yes	5	Field	Table 3	no	na	cotton	Cry1Ac	Lepidoptera	MON531/757/1076	Bollgard I	not specified	sampled throughout season	not specified	na	na	na	na	na	na	no	na	na	Arthropoda	Insecta	Coleoptera	Coccinellidae	not specified	not specified	Coccinellidae	predator	Chewing	na	natural population of variable ages	larva	Chronic toxicology	Georgia
301	12	Head et al. [b]	2005	Environmental Entomology 34(5): 1257-1266	A multiyear, large-scale comparison of arthropod populations on commercially managed Bt and non-Bt cotton fields	Corporate & Academic	Monsanto Company	na	na	yes	United States	North America	yes	5	Field	Table 3	no	na	cotton	Cry1Ac	Lepidoptera	MON531/757/1076	Bollgard I	not specified	sampled throughout season	not specified	na	na	na	na	na	na	no	na	na	Arthropoda	Insecta	Coleoptera	Coccinellidae	not specified	not specified	Coccinellidae	predator	Chewing	na	natural population of variable ages	adult	Chronic toxicology	Georgia
302	12	Head et al. [b]	2005	Environmental Entomology 34(5): 1257-1266	A multiyear, large-scale comparison of arthropod populations on commercially managed Bt and non-Bt cotton fields	Corporate & Academic	Monsanto Company	na	na	yes	United States	North America	yes	5	Field	Table 3	no	na	cotton	Cry1Ac	Lepidoptera	MON531/757/1076	Bollgard I	not specified	sampled throughout season	not specified	na	na	na	na	na	na	no	na	na	Arthropoda	Insecta	Hymenoptera	Formicidae	Solenopsis	Solenopsis invicta	Solenopsis invicta	omnivore	Mandibulate-sucking	na	natural population of variable ages	not specified	Chronic toxicology	Georgia
303	12	Head et al. [b]	2005	Environmental Entomology 34(5): 1257-1266	A multiyear, large-scale comparison of arthropod populations on commercially managed Bt and non-Bt cotton fields	Corporate & Academic	Monsanto Company	na	na	yes	United States	North America	yes	5	Field	Table 3	no	na	cotton	Cry1Ac	Lepidoptera	MON531/757/1076	Bollgard I	not specified	sampled throughout season	not specified	na	na	na	na	na	na	no	na	na	Arthropoda	Arachnida	Araneae	not specified	not specified	not specified	Araneae	predator	Piercing	na	natural population of variable ages	not specified	Chronic toxicology	Georgia
304	12	Head et al. [b]	2005	Environmental Entomology 34(5): 1257-1266	A multiyear, large-scale comparison of arthropod populations on commercially managed Bt and non-Bt cotton fields	Corporate & Academic	Monsanto Company	na	na	yes	United States	North America	yes	6	Field	Table 2	no	na	cotton	Cry1Ac	Lepidoptera	MON531/757/1076	Bollgard I	not specified	sampled throughout season	not specified	na	na	na	na	na	na	no	na	na	Arthropoda	Insecta	Hemiptera	Miridae	Lygus	not specified	Lygus	herbivore	Piercing	na	natural population of variable ages	nymph	Chronic toxicology	North Alabama
305	12	Head et al. [b]	2005	Environmental Entomology 34(5): 1257-1266	A multiyear, large-scale comparison of arthropod populations on commercially managed Bt and non-Bt cotton fields	Corporate & Academic	Monsanto Company	na	na	yes	United States	North America	yes	6	Field	Table 2	no	na	cotton	Cry1Ac	Lepidoptera	MON531/757/1076	Bollgard I	not specified	sampled throughout season	not specified	na	na	na	na	na	na	no	na	na	Arthropoda	Insecta	Hemiptera	Miridae	Lygus	not specified	Lygus	herbivore	Piercing	na	natural population of variable ages	adult	Chronic toxicology	North Alabama
306	12	Head et al. [b]	2005	Environmental Entomology 34(5): 1257-1266	A multiyear, large-scale comparison of arthropod populations on commercially managed Bt and non-Bt cotton fields	Corporate & Academic	Monsanto Company	na	na	yes	United States	North America	yes	6	Field	Table 2	no	na	cotton	Cry1Ac	Lepidoptera	MON531/757/1076	Bollgard I	not specified	sampled throughout season	not specified	na	na	na	na	na	na	no	na	na	Arthropoda	Insecta	Hemiptera	Pentatomidae	not specified	not specified	Pentatomidae	mixed	Piercing	na	natural population of variable ages	nymph	Chronic toxicology	North Alabama
307	12	Head et al. [b]	2005	Environmental Entomology 34(5): 1257-1266	A multiyear, large-scale comparison of arthropod populations on commercially managed Bt and non-Bt cotton fields	Corporate & Academic	Monsanto Company	na	na	yes	United States	North America	yes	6	Field	Table 2	no	na	cotton	Cry1Ac	Lepidoptera	MON531/757/1076	Bollgard I	not specified	sampled throughout season	not specified	na	na	na	na	na	na	no	na	na	Arthropoda	Insecta	Hemiptera	Pentatomidae	not specified	not specified	Pentatomidae	mixed	Piercing	na	natural population of variable ages	adult	Chronic toxicology	North Alabama
308	12	Head et al. [b]	2005	Environmental Entomology 34(5): 1257-1266	A multiyear, large-scale comparison of arthropod populations on commercially managed Bt and non-Bt cotton fields	Corporate & Academic	Monsanto Company	na	na	yes	United States	North America	yes	6	Field	Table 3	no	na	cotton	Cry1Ac	Lepidoptera	MON531/757/1076	Bollgard I	not specified	sampled throughout season	not specified	na	na	na	na	na	na	no	na	na	Arthropoda	Insecta	Hemiptera	Geocoridae	Geocoris	not specified	Geocoris	predator	Piercing	na	natural population of variable ages	nymph	Chronic toxicology	North Alabama
309	12	Head et al. [b]	2005	Environmental Entomology 34(5): 1257-1266	A multiyear, large-scale comparison of arthropod populations on commercially managed Bt and non-Bt cotton fields	Corporate & Academic	Monsanto Company	na	na	yes	United States	North America	yes	6	Field	Table 3	no	na	cotton	Cry1Ac	Lepidoptera	MON531/757/1076	Bollgard I	not specified	sampled throughout season	not specified	na	na	na	na	na	na	no	na	na	Arthropoda	Insecta	Hemiptera	Geocoridae	Geocoris	not specified	Geocoris	predator	Piercing	na	natural population of variable ages	adult	Chronic toxicology	North Alabama
310	12	Head et al. [b]	2005	Environmental Entomology 34(5): 1257-1266	A multiyear, large-scale comparison of arthropod populations on commercially managed Bt and non-Bt cotton fields	Corporate & Academic	Monsanto Company	na	na	yes	United States	North America	yes	6	Field	Table 3	no	na	cotton	Cry1Ac	Lepidoptera	MON531/757/1076	Bollgard I	not specified	sampled throughout season	not specified	na	na	na	na	na	na	no	na	na	Arthropoda	Insecta	Hemiptera	Anthocoridae	Orius	not specified	Orius	predator	Piercing	na	natural population of variable ages	nymph & adult	Chronic toxicology	North Alabama
311	12	Head et al. [b]	2005	Environmental Entomology 34(5): 1257-1266	A multiyear, large-scale comparison of arthropod populations on commercially managed Bt and non-Bt cotton fields	Corporate & Academic	Monsanto Company	na	na	yes	United States	North America	yes	6	Field	Table 3	no	na	cotton	Cry1Ac	Lepidoptera	MON531/757/1076	Bollgard I	not specified	sampled throughout season	not specified	na	na	na	na	na	na	no	na	na	Arthropoda	Insecta	Hemiptera	Nabidae	Nabis	not specified	Nabis	predator	Piercing	na	natural population of variable ages	not specified	Chronic toxicology	North Alabama
312	12	Head et al. [b]	2005	Environmental Entomology 34(5): 1257-1266	A multiyear, large-scale comparison of arthropod populations on commercially managed Bt and non-Bt cotton fields	Corporate & Academic	Monsanto Company	na	na	yes	United States	North America	yes	6	Field	Table 3	no	na	cotton	Cry1Ac	Lepidoptera	MON531/757/1076	Bollgard I	not specified	sampled throughout season	not specified	na	na	na	na	na	na	no	na	na	Arthropoda	Insecta	Neuroptera	Chrysopidae & Hemerobidae	not specified	not specified	Chrysopidae & Hemerobidae	predator	Piercing	na	natural population of variable ages	larva	Chronic toxicology	North Alabama
313	12	Head et al. [b]	2005	Environmental Entomology 34(5): 1257-1266	A multiyear, large-scale comparison of arthropod populations on commercially managed Bt and non-Bt cotton fields	Corporate & Academic	Monsanto Company	na	na	yes	United States	North America	yes	6	Field	Table 3	no	na	cotton	Cry1Ac	Lepidoptera	MON531/757/1076	Bollgard I	not specified	sampled throughout season	not specified	na	na	na	na	na	na	no	na	na	Arthropoda	Insecta	Neuroptera	Chrysopidae & Hemerobidae	not specified	not specified	Chrysopidae & Hemerobidae	predator	Chewing	na	natural population of variable ages	adult	Chronic toxicology	North Alabama
314	12	Head et al. [b]	2005	Environmental Entomology 34(5): 1257-1266	A multiyear, large-scale comparison of arthropod populations on commercially managed Bt and non-Bt cotton fields	Corporate & Academic	Monsanto Company	na	na	yes	United States	North America	yes	6	Field	Table 3	no	na	cotton	Cry1Ac	Lepidoptera	MON531/757/1076	Bollgard I	not specified	sampled throughout season	not specified	na	na	na	na	na	na	no	na	na	Arthropoda	Insecta	Coleoptera	Coccinellidae	not specified	not specified	Coccinellidae	predator	Chewing	na	natural population of variable ages	larva	Chronic toxicology	North Alabama
315	12	Head et al. [b]	2005	Environmental Entomology 34(5): 1257-1266	A multiyear, large-scale comparison of arthropod populations on commercially managed Bt and non-Bt cotton fields	Corporate & Academic	Monsanto Company	na	na	yes	United States	North America	yes	6	Field	Table 3	no	na	cotton	Cry1Ac	Lepidoptera	MON531/757/1076	Bollgard I	not specified	sampled throughout season	not specified	na	na	na	na	na	na	no	na	na	Arthropoda	Insecta	Coleoptera	Coccinellidae	not specified	not specified	Coccinellidae	predator	Chewing	na	natural population of variable ages	adult	Chronic toxicology	North Alabama
316	12	Head et al. [b]	2005	Environmental Entomology 34(5): 1257-1266	A multiyear, large-scale comparison of arthropod populations on commercially managed Bt and non-Bt cotton fields	Corporate & Academic	Monsanto Company	na	na	yes	United States	North America	yes	6	Field	Table 3	no	na	cotton	Cry1Ac	Lepidoptera	MON531/757/1076	Bollgard I	not specified	sampled throughout season	not specified	na	na	na	na	na	na	no	na	na	Arthropoda	Insecta	Hymenoptera	Formicidae	Solenopsis	Solenopsis invicta	Solenopsis invicta	omnivore	Mandibulate-sucking	na	natural population of variable ages	not specified	Chronic toxicology	North Alabama
317	12	Head et al. [b]	2005	Environmental Entomology 34(5): 1257-1266	A multiyear, large-scale comparison of arthropod populations on commercially managed Bt and non-Bt cotton fields	Corporate & Academic	Monsanto Company	na	na	yes	United States	North America	yes	6	Field	Table 3	no	na	cotton	Cry1Ac	Lepidoptera	MON531/757/1076	Bollgard I	not specified	sampled throughout season	not specified	na	na	na	na	na	na	no	na	na	Arthropoda	Arachnida	Araneae	not specified	not specified	not specified	Araneae	predator	Piercing	na	natural population of variable ages	not specified	Chronic toxicology	North Alabama
318	12	Head et al. [b]	2005	Environmental Entomology 34(5): 1257-1266	A multiyear, large-scale comparison of arthropod populations on commercially managed Bt and non-Bt cotton fields	Corporate & Academic	Monsanto Company	na	na	yes	United States	North America	yes	7	Field	Table 2	no	na	cotton	Cry1Ac	Lepidoptera	MON531/757/1076	Bollgard I	not specified	sampled throughout season	not specified	na	na	na	na	na	na	no	na	na	Arthropoda	Insecta	Hemiptera	Miridae	Lygus	not specified	Lygus	herbivore	Piercing	na	natural population of variable ages	nymph	Chronic toxicology	South Alabama
321	12	Head et al. [b]	2005	Environmental Entomology 34(5): 1257-1266	A multiyear, large-scale comparison of arthropod populations on commercially managed Bt and non-Bt cotton fields	Corporate & Academic	Monsanto Company	na	na	yes	United States	North America	yes	7	Field	Table 2	no	na	cotton	Cry1Ac	Lepidoptera	MON531/757/1076	Bollgard I	not specified	sampled throughout season	not specified	na	na	na	na	na	na	no	na	na	Arthropoda	Insecta	Hemiptera	Pentatomidae	not specified	not specified	Pentatomidae	mixed	Piercing	na	natural population of variable ages	adult	Chronic toxicology	South Alabama
322	12	Head et al. [b]	2005	Environmental Entomology 34(5): 1257-1266	A multiyear, large-scale comparison of arthropod populations on commercially managed Bt and non-Bt cotton fields	Corporate & Academic	Monsanto Company	na	na	yes	United States	North America	yes	7	Field	Table 3	no	na	cotton	Cry1Ac	Lepidoptera	MON531/757/1076	Bollgard I	not specified	sampled throughout season	not specified	na	na	na	na	na	na	no	na	na	Arthropoda	Insecta	Hemiptera	Geocoridae	Geocoris	not specified	Geocoris	predator	Piercing	na	natural population of variable ages	adult	Chronic toxicology	South Alabama
323	12	Head et al. [b]	2005	Environmental Entomology 34(5): 1257-1266	A multiyear, large-scale comparison of arthropod populations on commercially managed Bt and non-Bt cotton fields	Corporate & Academic	Monsanto Company	na	na	yes	United States	North America	yes	7	Field	Table 3	no	na	cotton	Cry1Ac	Lepidoptera	MON531/757/1076	Bollgard I	not specified	sampled throughout season	not specified	na	na	na	na	na	na	no	na	na	Arthropoda	Insecta	Hemiptera	Anthocoridae	Orius	not specified	Orius	predator	Piercing	na	natural population of variable ages	nymph & adult	Chronic toxicology	South Alabama
326	12	Head et al. [b]	2005	Environmental Entomology 34(5): 1257-1266	A multiyear, large-scale comparison of arthropod populations on commercially managed Bt and non-Bt cotton fields	Corporate & Academic	Monsanto Company	na	na	yes	United States	North America	yes	7	Field	Table 3	no	na	cotton	Cry1Ac	Lepidoptera	MON531/757/1076	Bollgard I	not specified	sampled throughout season	not specified	na	na	na	na	na	na	no	na	na	Arthropoda	Insecta	Coleoptera	Coccinellidae	not specified	not specified	Coccinellidae	predator	Chewing	na	natural population of variable ages	larva	Chronic toxicology	South Alabama
327	12	Head et al. [b]	2005	Environmental Entomology 34(5): 1257-1266	A multiyear, large-scale comparison of arthropod populations on commercially managed Bt and non-Bt cotton fields	Corporate & Academic	Monsanto Company	na	na	yes	United States	North America	yes	7	Field	Table 3	no	na	cotton	Cry1Ac	Lepidoptera	MON531/757/1076	Bollgard I	not specified	sampled throughout season	not specified	na	na	na	na	na	na	no	na	na	Arthropoda	Insecta	Coleoptera	Coccinellidae	not specified	not specified	Coccinellidae	predator	Chewing	na	natural population of variable ages	adult	Chronic toxicology	South Alabama
328	12	Head et al. [b]	2005	Environmental Entomology 34(5): 1257-1266	A multiyear, large-scale comparison of arthropod populations on commercially managed Bt and non-Bt cotton fields	Corporate & Academic	Monsanto Company	na	na	yes	United States	North America	yes	7	Field	Table 3	no	na	cotton	Cry1Ac	Lepidoptera	MON531/757/1076	Bollgard I	not specified	sampled throughout season	not specified	na	na	na	na	na	na	no	na	na	Arthropoda	Insecta	Hymenoptera	Formicidae	Solenopsis	Solenopsis invicta	Solenopsis invicta	omnivore	Mandibulate-sucking	na	natural population of variable ages	not specified	Chronic toxicology	South Alabama
329	12	Head et al. [b]	2005	Environmental Entomology 34(5): 1257-1266	A multiyear, large-scale comparison of arthropod populations on commercially managed Bt and non-Bt cotton fields	Corporate & Academic	Monsanto Company	na	na	yes	United States	North America	yes	7	Field	Table 3	no	na	cotton	Cry1Ac	Lepidoptera	MON531/757/1076	Bollgard I	not specified	sampled throughout season	not specified	na	na	na	na	na	na	no	na	na	Arthropoda	Arachnida	Araneae	not specified	not specified	not specified	Araneae	predator	Piercing	na	natural population of variable ages	not specified	Chronic toxicology	South Alabama
330	12	Head et al. [b]	2005	Environmental Entomology 34(5): 1257-1266	A multiyear, large-scale comparison of arthropod populations on commercially managed Bt and non-Bt cotton fields	Corporate & Academic	Monsanto Company	na	na	yes	United States	North America	yes	8	Field	Table 2	no	na	cotton	Cry1Ac	Lepidoptera	MON531/757/1076	Bollgard I	not specified	sampled throughout season	not specified	na	na	na	na	na	na	no	na	na	Arthropoda	Insecta	Hemiptera	Miridae	Lygus	not specified	Lygus	herbivore	Piercing	na	natural population of variable ages	adult	Chronic toxicology	South Carolina
332	12	Head et al. [b]	2005	Environmental Entomology 34(5): 1257-1266	A multiyear, large-scale comparison of arthropod populations on commercially managed Bt and non-Bt cotton fields	Corporate & Academic	Monsanto Company	na	na	yes	United States	North America	yes	8	Field	Table 2	no	na	cotton	Cry1Ac	Lepidoptera	MON531/757/1076	Bollgard I	not specified	sampled throughout season	not specified	na	na	na	na	na	na	no	na	na	Arthropoda	Insecta	Hemiptera	Pentatomidae	not specified	not specified	Pentatomidae	mixed	Piercing	na	natural population of variable ages	adult	Chronic toxicology	South Carolina
333	12	Head et al. [b]	2005	Environmental Entomology 34(5): 1257-1266	A multiyear, large-scale comparison of arthropod populations on commercially managed Bt and non-Bt cotton fields	Corporate & Academic	Monsanto Company	na	na	yes	United States	North America	yes	8	Field	Table 3	no	na	cotton	Cry1Ac	Lepidoptera	MON531/757/1076	Bollgard I	not specified	sampled throughout season	not specified	na	na	na	na	na	na	no	na	na	Arthropoda	Insecta	Hemiptera	Geocoridae	Geocoris	not specified	Geocoris	predator	Piercing	na	natural population of variable ages	nymph	Chronic toxicology	South Carolina
334	12	Head et al. [b]	2005	Environmental Entomology 34(5): 1257-1266	A multiyear, large-scale comparison of arthropod populations on commercially managed Bt and non-Bt cotton fields	Corporate & Academic	Monsanto Company	na	na	yes	United States	North America	yes	8	Field	Table 3	no	na	cotton	Cry1Ac	Lepidoptera	MON531/757/1076	Bollgard I	not specified	sampled throughout season	not specified	na	na	na	na	na	na	no	na	na	Arthropoda	Insecta	Hemiptera	Geocoridae	Geocoris	not specified	Geocoris	predator	Piercing	na	natural population of variable ages	adult	Chronic toxicology	South Carolina
335	12	Head et al. [b]	2005	Environmental Entomology 34(5): 1257-1266	A multiyear, large-scale comparison of arthropod populations on commercially managed Bt and non-Bt cotton fields	Corporate & Academic	Monsanto Company	na	na	yes	United States	North America	yes	8	Field	Table 3	no	na	cotton	Cry1Ac	Lepidoptera	MON531/757/1076	Bollgard I	not specified	sampled throughout season	not specified	na	na	na	na	na	na	no	na	na	Arthropoda	Insecta	Hemiptera	Anthocoridae	Orius	not specified	Orius	predator	Piercing	na	natural population of variable ages	nymph & adult	Chronic toxicology	South Carolina
336	12	Head et al. [b]	2005	Environmental Entomology 34(5): 1257-1266	A multiyear, large-scale comparison of arthropod populations on commercially managed Bt and non-Bt cotton fields	Corporate & Academic	Monsanto Company	na	na	yes	United States	North America	yes	8	Field	Table 3	no	na	cotton	Cry1Ac	Lepidoptera	MON531/757/1076	Bollgard I	not specified	sampled throughout season	not specified	na	na	na	na	na	na	no	na	na	Arthropoda	Insecta	Hemiptera	Nabidae	Nabis	not specified	Nabis	predator	Piercing	na	natural population of variable ages	not specified	Chronic toxicology	South Carolina
337	12	Head et al. [b]	2005	Environmental Entomology 34(5): 1257-1266	A multiyear, large-scale comparison of arthropod populations on commercially managed Bt and non-Bt cotton fields	Corporate & Academic	Monsanto Company	na	na	yes	United States	North America	yes	8	Field	Table 3	no	na	cotton	Cry1Ac	Lepidoptera	MON531/757/1076	Bollgard I	not specified	sampled throughout season	not specified	na	na	na	na	na	na	no	na	na	Arthropoda	Insecta	Neuroptera	Chrysopidae & Hemerobidae	not specified	not specified	Chrysopidae & Hemerobidae	predator	Piercing	na	natural population of variable ages	larva	Chronic toxicology	South Carolina
338	12	Head et al. [b]	2005	Environmental Entomology 34(5): 1257-1266	A multiyear, large-scale comparison of arthropod populations on commercially managed Bt and non-Bt cotton fields	Corporate & Academic	Monsanto Company	na	na	yes	United States	North America	yes	8	Field	Table 3	no	na	cotton	Cry1Ac	Lepidoptera	MON531/757/1076	Bollgard I	not specified	sampled throughout season	not specified	na	na	na	na	na	na	no	na	na	Arthropoda	Insecta	Neuroptera	Chrysopidae & Hemerobidae	not specified	not specified	Chrysopidae & Hemerobidae	predator	Chewing	na	natural population of variable ages	adult	Chronic toxicology	South Carolina
339	12	Head et al. [b]	2005	Environmental Entomology 34(5): 1257-1266	A multiyear, large-scale comparison of arthropod populations on commercially managed Bt and non-Bt cotton fields	Corporate & Academic	Monsanto Company	na	na	yes	United States	North America	yes	8	Field	Table 3	no	na	cotton	Cry1Ac	Lepidoptera	MON531/757/1076	Bollgard I	not specified	sampled throughout season	not specified	na	na	na	na	na	na	no	na	na	Arthropoda	Insecta	Coleoptera	Coccinellidae	not specified	not specified	Coccinellidae	predator	Chewing	na	natural population of variable ages	larva	Chronic toxicology	South Carolina
340	12	Head et al. [b]	2005	Environmental Entomology 34(5): 1257-1266	A multiyear, large-scale comparison of arthropod populations on commercially managed Bt and non-Bt cotton fields	Corporate & Academic	Monsanto Company	na	na	yes	United States	North America	yes	8	Field	Table 3	no	na	cotton	Cry1Ac	Lepidoptera	MON531/757/1076	Bollgard I	not specified	sampled throughout season	not specified	na	na	na	na	na	na	no	na	na	Arthropoda	Insecta	Coleoptera	Coccinellidae	not specified	not specified	Coccinellidae	predator	Chewing	na	natural population of variable ages	adult	Chronic toxicology	South Carolina
341	12	Head et al. [b]	2005	Environmental Entomology 34(5): 1257-1266	A multiyear, large-scale comparison of arthropod populations on commercially managed Bt and non-Bt cotton fields	Corporate & Academic	Monsanto Company	na	na	yes	United States	North America	yes	8	Field	Table 3	no	na	cotton	Cry1Ac	Lepidoptera	MON531/757/1076	Bollgard I	not specified	sampled throughout season	not specified	na	na	na	na	na	na	no	na	na	Arthropoda	Insecta	Hymenoptera	Formicidae	Solenopsis	Solenopsis invicta	Solenopsis invicta	omnivore	Mandibulate-sucking	na	natural population of variable ages	not specified	Chronic toxicology	South Carolina
342	12	Head et al. [b]	2005	Environmental Entomology 34(5): 1257-1266	A multiyear, large-scale comparison of arthropod populations on commercially managed Bt and non-Bt cotton fields	Corporate & Academic	Monsanto Company	na	na	yes	United States	North America	yes	8	Field	Table 3	no	na	cotton	Cry1Ac	Lepidoptera	MON531/757/1076	Bollgard I	not specified	sampled throughout season	not specified	na	na	na	na	na	na	no	na	na	Arthropoda	Arachnida	Araneae	not specified	not specified	not specified	Araneae	predator	Piercing	na	natural population of variable ages	not specified	Chronic toxicology	South Carolina
343	12	Head et al. [b]	2005	Environmental Entomology 34(5): 1257-1266	A multiyear, large-scale comparison of arthropod populations on commercially managed Bt and non-Bt cotton fields	Corporate & Academic	Monsanto Company	na	na	yes	United States	North America	yes	9	Field	Table 2	no	na	cotton	Cry1Ac	Lepidoptera	MON531/757/1076	Bollgard I	not specified	sampled throughout season	not specified	na	na	na	na	na	na	no	na	na	Arthropoda	Insecta	Hemiptera	Miridae	Lygus	not specified	Lygus	herbivore	Piercing	na	natural population of variable ages	nymph	Chronic toxicology	Georgia
344	12	Head et al. [b]	2005	Environmental Entomology 34(5): 1257-1266	A multiyear, large-scale comparison of arthropod populations on commercially managed Bt and non-Bt cotton fields	Corporate & Academic	Monsanto Company	na	na	yes	United States	North America	yes	9	Field	Table 2	no	na	cotton	Cry1Ac	Lepidoptera	MON531/757/1076	Bollgard I	not specified	sampled throughout season	not specified	na	na	na	na	na	na	no	na	na	Arthropoda	Insecta	Hemiptera	Miridae	Lygus	not specified	Lygus	herbivore	Piercing	na	natural population of variable ages	adult	Chronic toxicology	Georgia
345	12	Head et al. [b]	2005	Environmental Entomology 34(5): 1257-1266	A multiyear, large-scale comparison of arthropod populations on commercially managed Bt and non-Bt cotton fields	Corporate & Academic	Monsanto Company	na	na	yes	United States	North America	yes	9	Field	Table 2	no	na	cotton	Cry1Ac	Lepidoptera	MON531/757/1076	Bollgard I	not specified	sampled throughout season	not specified	na	na	na	na	na	na	no	na	na	Arthropoda	Insecta	Hemiptera	Pentatomidae	not specified	not specified	Pentatomidae	mixed	Piercing	na	natural population of variable ages	nymph & adult	Chronic toxicology	Georgia
346	12	Head et al. [b]	2005	Environmental Entomology 34(5): 1257-1266	A multiyear, large-scale comparison of arthropod populations on commercially managed Bt and non-Bt cotton fields	Corporate & Academic	Monsanto Company	na	na	yes	United States	North America	yes	9	Field	Table 3	no	na	cotton	Cry1Ac	Lepidoptera	MON531/757/1076	Bollgard I	not specified	sampled throughout season	not specified	na	na	na	na	na	na	no	na	na	Arthropoda	Insecta	Hemiptera	Geocoridae	Geocoris	not specified	Geocoris	predator	Piercing	na	natural population of variable ages	nymph	Chronic toxicology	Georgia
347	12	Head et al. [b]	2005	Environmental Entomology 34(5): 1257-1266	A multiyear, large-scale comparison of arthropod populations on commercially managed Bt and non-Bt cotton fields	Corporate & Academic	Monsanto Company	na	na	yes	United States	North America	yes	9	Field	Table 3	no	na	cotton	Cry1Ac	Lepidoptera	MON531/757/1076	Bollgard I	not specified	sampled throughout season	not specified	na	na	na	na	na	na	no	na	na	Arthropoda	Insecta	Hemiptera	Geocoridae	Geocoris	not specified	Geocoris	predator	Piercing	na	natural population of variable ages	adult	Chronic toxicology	Georgia
348	12	Head et al. [b]	2005	Environmental Entomology 34(5): 1257-1266	A multiyear, large-scale comparison of arthropod populations on commercially managed Bt and non-Bt cotton fields	Corporate & Academic	Monsanto Company	na	na	yes	United States	North America	yes	9	Field	Table 3	no	na	cotton	Cry1Ac	Lepidoptera	MON531/757/1076	Bollgard I	not specified	sampled throughout season	not specified	na	na	na	na	na	na	no	na	na	Arthropoda	Insecta	Hemiptera	Anthocoridae	Orius	not specified	Orius	predator	Piercing	na	natural population of variable ages	nymph & adult	Chronic toxicology	Georgia
349	12	Head et al. [b]	2005	Environmental Entomology 34(5): 1257-1266	A multiyear, large-scale comparison of arthropod populations on commercially managed Bt and non-Bt cotton fields	Corporate & Academic	Monsanto Company	na	na	yes	United States	North America	yes	9	Field	Table 3	no	na	cotton	Cry1Ac	Lepidoptera	MON531/757/1076	Bollgard I	not specified	sampled throughout season	not specified	na	na	na	na	na	na	no	na	na	Arthropoda	Insecta	Hemiptera	Nabidae	Nabis	not specified	Nabis	predator	Piercing	na	natural population of variable ages	not specified	Chronic toxicology	Georgia
350	12	Head et al. [b]	2005	Environmental Entomology 34(5): 1257-1266	A multiyear, large-scale comparison of arthropod populations on commercially managed Bt and non-Bt cotton fields	Corporate & Academic	Monsanto Company	na	na	yes	United States	North America	yes	9	Field	Table 3	no	na	cotton	Cry1Ac	Lepidoptera	MON531/757/1076	Bollgard I	not specified	sampled throughout season	not specified	na	na	na	na	na	na	no	na	na	Arthropoda	Insecta	Neuroptera	Chrysopidae & Hemerobidae	not specified	not specified	Chrysopidae & Hemerobidae	predator	Piercing	na	natural population of variable ages	larva	Chronic toxicology	Georgia
351	12	Head et al. [b]	2005	Environmental Entomology 34(5): 1257-1266	A multiyear, large-scale comparison of arthropod populations on commercially managed Bt and non-Bt cotton fields	Corporate & Academic	Monsanto Company	na	na	yes	United States	North America	yes	9	Field	Table 3	no	na	cotton	Cry1Ac	Lepidoptera	MON531/757/1076	Bollgard I	not specified	sampled throughout season	not specified	na	na	na	na	na	na	no	na	na	Arthropoda	Insecta	Coleoptera	Coccinellidae	not specified	not specified	Coccinellidae	predator	Chewing	na	natural population of variable ages	larva	Chronic toxicology	Georgia
352	12	Head et al. [b]	2005	Environmental Entomology 34(5): 1257-1266	A multiyear, large-scale comparison of arthropod populations on commercially managed Bt and non-Bt cotton fields	Corporate & Academic	Monsanto Company	na	na	yes	United States	North America	yes	9	Field	Table 3	no	na	cotton	Cry1Ac	Lepidoptera	MON531/757/1076	Bollgard I	not specified	sampled throughout season	not specified	na	na	na	na	na	na	no	na	na	Arthropoda	Insecta	Coleoptera	Coccinellidae	not specified	not specified	Coccinellidae	predator	Chewing	na	natural population of variable ages	adult	Chronic toxicology	Georgia
353	12	Head et al. [b]	2005	Environmental Entomology 34(5): 1257-1266	A multiyear, large-scale comparison of arthropod populations on commercially managed Bt and non-Bt cotton fields	Corporate & Academic	Monsanto Company	na	na	yes	United States	North America	yes	9	Field	Table 3	no	na	cotton	Cry1Ac	Lepidoptera	MON531/757/1076	Bollgard I	not specified	sampled throughout season	not specified	na	na	na	na	na	na	no	na	na	Arthropoda	Insecta	Hymenoptera	Formicidae	Solenopsis	Solenopsis invicta	Solenopsis invicta	omnivore	Mandibulate-sucking	na	natural population of variable ages	not specified	Chronic toxicology	Georgia
354	12	Head et al. [b]	2005	Environmental Entomology 34(5): 1257-1266	A multiyear, large-scale comparison of arthropod populations on commercially managed Bt and non-Bt cotton fields	Corporate & Academic	Monsanto Company	na	na	yes	United States	North America	yes	9	Field	Table 3	no	na	cotton	Cry1Ac	Lepidoptera	MON531/757/1076	Bollgard I	not specified	sampled throughout season	not specified	na	na	na	na	na	na	no	na	na	Arthropoda	Arachnida	Araneae	not specified	not specified	not specified	Araneae	predator	Piercing	na	natural population of variable ages	not specified	Chronic toxicology	Georgia
355	12	Head et al. [b]	2005	Environmental Entomology 34(5): 1257-1266	A multiyear, large-scale comparison of arthropod populations on commercially managed Bt and non-Bt cotton fields	Corporate & Academic	Monsanto Company	na	na	yes	United States	North America	yes	10	Field	Table 2	no	na	cotton	Cry1Ac	Lepidoptera	MON531/757/1076	Bollgard I	not specified	sampled throughout season	not specified	na	na	na	na	na	na	no	na	na	Arthropoda	Insecta	Hemiptera	Miridae	Lygus	not specified	Lygus	herbivore	Piercing	na	natural population of variable ages	nymph	Chronic toxicology	North Alabama
356	12	Head et al. [b]	2005	Environmental Entomology 34(5): 1257-1266	A multiyear, large-scale comparison of arthropod populations on commercially managed Bt and non-Bt cotton fields	Corporate & Academic	Monsanto Company	na	na	yes	United States	North America	yes	10	Field	Table 2	no	na	cotton	Cry1Ac	Lepidoptera	MON531/757/1076	Bollgard I	not specified	sampled throughout season	not specified	na	na	na	na	na	na	no	na	na	Arthropoda	Insecta	Hemiptera	Miridae	Lygus	not specified	Lygus	herbivore	Piercing	na	natural population of variable ages	adult	Chronic toxicology	North Alabama
357	12	Head et al. [b]	2005	Environmental Entomology 34(5): 1257-1266	A multiyear, large-scale comparison of arthropod populations on commercially managed Bt and non-Bt cotton fields	Corporate & Academic	Monsanto Company	na	na	yes	United States	North America	yes	10	Field	Table 2	no	na	cotton	Cry1Ac	Lepidoptera	MON531/757/1076	Bollgard I	not specified	sampled throughout season	not specified	na	na	na	na	na	na	no	na	na	Arthropoda	Insecta	Hemiptera	Pentatomidae	not specified	not specified	Pentatomidae	mixed	Piercing	na	natural population of variable ages	nymph	Chronic toxicology	North Alabama
358	12	Head et al. [b]	2005	Environmental Entomology 34(5): 1257-1266	A multiyear, large-scale comparison of arthropod populations on commercially managed Bt and non-Bt cotton fields	Corporate & Academic	Monsanto Company	na	na	yes	United States	North America	yes	10	Field	Table 2	no	na	cotton	Cry1Ac	Lepidoptera	MON531/757/1076	Bollgard I	not specified	sampled throughout season	not specified	na	na	na	na	na	na	no	na	na	Arthropoda	Insecta	Hemiptera	Pentatomidae	not specified	not specified	Pentatomidae	mixed	Piercing	na	natural population of variable ages	adult	Chronic toxicology	North Alabama
359	12	Head et al. [b]	2005	Environmental Entomology 34(5): 1257-1266	A multiyear, large-scale comparison of arthropod populations on commercially managed Bt and non-Bt cotton fields	Corporate & Academic	Monsanto Company	na	na	yes	United States	North America	yes	10	Field	Table 3	no	na	cotton	Cry1Ac	Lepidoptera	MON531/757/1076	Bollgard I	not specified	sampled throughout season	not specified	na	na	na	na	na	na	no	na	na	Arthropoda	Insecta	Hemiptera	Geocoridae	Geocoris	not specified	Geocoris	predator	Piercing	na	natural population of variable ages	nymph	Chronic toxicology	North Alabama
360	12	Head et al. [b]	2005	Environmental Entomology 34(5): 1257-1266	A multiyear, large-scale comparison of arthropod populations on commercially managed Bt and non-Bt cotton fields	Corporate & Academic	Monsanto Company	na	na	yes	United States	North America	yes	10	Field	Table 3	no	na	cotton	Cry1Ac	Lepidoptera	MON531/757/1076	Bollgard I	not specified	sampled throughout season	not specified	na	na	na	na	na	na	no	na	na	Arthropoda	Insecta	Hemiptera	Geocoridae	Geocoris	not specified	Geocoris	predator	Piercing	na	natural population of variable ages	adult	Chronic toxicology	North Alabama
361	12	Head et al. [b]	2005	Environmental Entomology 34(5): 1257-1266	A multiyear, large-scale comparison of arthropod populations on commercially managed Bt and non-Bt cotton fields	Corporate & Academic	Monsanto Company	na	na	yes	United States	North America	yes	10	Field	Table 3	no	na	cotton	Cry1Ac	Lepidoptera	MON531/757/1076	Bollgard I	not specified	sampled throughout season	not specified	na	na	na	na	na	na	no	na	na	Arthropoda	Insecta	Hemiptera	Anthocoridae	Orius	not specified	Orius	predator	Piercing	na	natural population of variable ages	nymph & adult	Chronic toxicology	North Alabama
362	12	Head et al. [b]	2005	Environmental Entomology 34(5): 1257-1266	A multiyear, large-scale comparison of arthropod populations on commercially managed Bt and non-Bt cotton fields	Corporate & Academic	Monsanto Company	na	na	yes	United States	North America	yes	10	Field	Table 3	no	na	cotton	Cry1Ac	Lepidoptera	MON531/757/1076	Bollgard I	not specified	sampled throughout season	not specified	na	na	na	na	na	na	no	na	na	Arthropoda	Insecta	Hemiptera	Nabidae	Nabis	not specified	Nabis	predator	Piercing	na	natural population of variable ages	not specified	Chronic toxicology	North Alabama
363	12	Head et al. [b]	2005	Environmental Entomology 34(5): 1257-1266	A multiyear, large-scale comparison of arthropod populations on commercially managed Bt and non-Bt cotton fields	Corporate & Academic	Monsanto Company	na	na	yes	United States	North America	yes	10	Field	Table 3	no	na	cotton	Cry1Ac	Lepidoptera	MON531/757/1076	Bollgard I	not specified	sampled throughout season	not specified	na	na	na	na	na	na	no	na	na	Arthropoda	Insecta	Neuroptera	Chrysopidae & Hemerobidae	not specified	not specified	Chrysopidae & Hemerobidae	predator	Piercing	na	natural population of variable ages	larva	Chronic toxicology	North Alabama
364	12	Head et al. [b]	2005	Environmental Entomology 34(5): 1257-1266	A multiyear, large-scale comparison of arthropod populations on commercially managed Bt and non-Bt cotton fields	Corporate & Academic	Monsanto Company	na	na	yes	United States	North America	yes	10	Field	Table 3	no	na	cotton	Cry1Ac	Lepidoptera	MON531/757/1076	Bollgard I	not specified	sampled throughout season	not specified	na	na	na	na	na	na	no	na	na	Arthropoda	Insecta	Neuroptera	Chrysopidae & Hemerobidae	not specified	not specified	Chrysopidae & Hemerobidae	predator	Chewing	na	natural population of variable ages	adult	Chronic toxicology	North Alabama
365	12	Head et al. [b]	2005	Environmental Entomology 34(5): 1257-1266	A multiyear, large-scale comparison of arthropod populations on commercially managed Bt and non-Bt cotton fields	Corporate & Academic	Monsanto Company	na	na	yes	United States	North America	yes	10	Field	Table 3	no	na	cotton	Cry1Ac	Lepidoptera	MON531/757/1076	Bollgard I	not specified	sampled throughout season	not specified	na	na	na	na	na	na	no	na	na	Arthropoda	Insecta	Coleoptera	Coccinellidae	not specified	not specified	Coccinellidae	predator	Chewing	na	natural population of variable ages	larva	Chronic toxicology	North Alabama
366	12	Head et al. [b]	2005	Environmental Entomology 34(5): 1257-1266	A multiyear, large-scale comparison of arthropod populations on commercially managed Bt and non-Bt cotton fields	Corporate & Academic	Monsanto Company	na	na	yes	United States	North America	yes	10	Field	Table 3	no	na	cotton	Cry1Ac	Lepidoptera	MON531/757/1076	Bollgard I	not specified	sampled throughout season	not specified	na	na	na	na	na	na	no	na	na	Arthropoda	Insecta	Coleoptera	Coccinellidae	not specified	not specified	Coccinellidae	predator	Chewing	na	natural population of variable ages	adult	Chronic toxicology	North Alabama
367	12	Head et al. [b]	2005	Environmental Entomology 34(5): 1257-1266	A multiyear, large-scale comparison of arthropod populations on commercially managed Bt and non-Bt cotton fields	Corporate & Academic	Monsanto Company	na	na	yes	United States	North America	yes	10	Field	Table 3	no	na	cotton	Cry1Ac	Lepidoptera	MON531/757/1076	Bollgard I	not specified	sampled throughout season	not specified	na	na	na	na	na	na	no	na	na	Arthropoda	Insecta	Hymenoptera	Formicidae	Solenopsis	Solenopsis invicta	Solenopsis invicta	omnivore	Mandibulate-sucking	na	natural population of variable ages	not specified	Chronic toxicology	North Alabama
368	12	Head et al. [b]	2005	Environmental Entomology 34(5): 1257-1266	A multiyear, large-scale comparison of arthropod populations on commercially managed Bt and non-Bt cotton fields	Corporate & Academic	Monsanto Company	na	na	yes	United States	North America	yes	10	Field	Table 3	no	na	cotton	Cry1Ac	Lepidoptera	MON531/757/1076	Bollgard I	not specified	sampled throughout season	not specified	na	na	na	na	na	na	no	na	na	Arthropoda	Arachnida	Araneae	not specified	not specified	not specified	Araneae	predator	Piercing	na	natural population of variable ages	not specified	Chronic toxicology	North Alabama
370	12	Head et al. [b]	2005	Environmental Entomology 34(5): 1257-1266	A multiyear, large-scale comparison of arthropod populations on commercially managed Bt and non-Bt cotton fields	Corporate & Academic	Monsanto Company	na	na	yes	United States	North America	yes	11	Field	Table 2	no	na	cotton	Cry1Ac	Lepidoptera	MON531/757/1076	Bollgard I	not specified	sampled throughout season	not specified	na	na	na	na	na	na	no	na	na	Arthropoda	Insecta	Hemiptera	Miridae	Lygus	not specified	Lygus	herbivore	Piercing	na	natural population of variable ages	adult	Chronic toxicology	South Alabama
371	12	Head et al. [b]	2005	Environmental Entomology 34(5): 1257-1266	A multiyear, large-scale comparison of arthropod populations on commercially managed Bt and non-Bt cotton fields	Corporate & Academic	Monsanto Company	na	na	yes	United States	North America	yes	11	Field	Table 2	no	na	cotton	Cry1Ac	Lepidoptera	MON531/757/1076	Bollgard I	not specified	sampled throughout season	not specified	na	na	na	na	na	na	no	na	na	Arthropoda	Insecta	Hemiptera	Pentatomidae	not specified	not specified	Pentatomidae	mixed	Piercing	na	natural population of variable ages	nymph	Chronic toxicology	South Alabama
372	12	Head et al. [b]	2005	Environmental Entomology 34(5): 1257-1266	A multiyear, large-scale comparison of arthropod populations on commercially managed Bt and non-Bt cotton fields	Corporate & Academic	Monsanto Company	na	na	yes	United States	North America	yes	11	Field	Table 2	no	na	cotton	Cry1Ac	Lepidoptera	MON531/757/1076	Bollgard I	not specified	sampled throughout season	not specified	na	na	na	na	na	na	no	na	na	Arthropoda	Insecta	Hemiptera	Pentatomidae	not specified	not specified	Pentatomidae	mixed	Piercing	na	natural population of variable ages	adult	Chronic toxicology	South Alabama
374	12	Head et al. [b]	2005	Environmental Entomology 34(5): 1257-1266	A multiyear, large-scale comparison of arthropod populations on commercially managed Bt and non-Bt cotton fields	Corporate & Academic	Monsanto Company	na	na	yes	United States	North America	yes	11	Field	Table 3	no	na	cotton	Cry1Ac	Lepidoptera	MON531/757/1076	Bollgard I	not specified	sampled throughout season	not specified	na	na	na	na	na	na	no	na	na	Arthropoda	Insecta	Hemiptera	Geocoridae	Geocoris	not specified	Geocoris	predator	Piercing	na	natural population of variable ages	adult	Chronic toxicology	South Alabama
378	12	Head et al. [b]	2005	Environmental Entomology 34(5): 1257-1266	A multiyear, large-scale comparison of arthropod populations on commercially managed Bt and non-Bt cotton fields	Corporate & Academic	Monsanto Company	na	na	yes	United States	North America	yes	11	Field	Table 3	no	na	cotton	Cry1Ac	Lepidoptera	MON531/757/1076	Bollgard I	not specified	sampled throughout season	not specified	na	na	na	na	na	na	no	na	na	Arthropoda	Insecta	Coleoptera	Coccinellidae	not specified	not specified	Coccinellidae	predator	Chewing	na	natural population of variable ages	larva	Chronic toxicology	South Alabama
379	12	Head et al. [b]	2005	Environmental Entomology 34(5): 1257-1266	A multiyear, large-scale comparison of arthropod populations on commercially managed Bt and non-Bt cotton fields	Corporate & Academic	Monsanto Company	na	na	yes	United States	North America	yes	11	Field	Table 3	no	na	cotton	Cry1Ac	Lepidoptera	MON531/757/1076	Bollgard I	not specified	sampled throughout season	not specified	na	na	na	na	na	na	no	na	na	Arthropoda	Insecta	Coleoptera	Coccinellidae	not specified	not specified	Coccinellidae	predator	Chewing	na	natural population of variable ages	adult	Chronic toxicology	South Alabama
380	12	Head et al. [b]	2005	Environmental Entomology 34(5): 1257-1266	A multiyear, large-scale comparison of arthropod populations on commercially managed Bt and non-Bt cotton fields	Corporate & Academic	Monsanto Company	na	na	yes	United States	North America	yes	11	Field	Table 3	no	na	cotton	Cry1Ac	Lepidoptera	MON531/757/1076	Bollgard I	not specified	sampled throughout season	not specified	na	na	na	na	na	na	no	na	na	Arthropoda	Insecta	Hymenoptera	Formicidae	Solenopsis	Solenopsis invicta	Solenopsis invicta	omnivore	Mandibulate-sucking	na	natural population of variable ages	not specified	Chronic toxicology	South Alabama
381	12	Head et al. [b]	2005	Environmental Entomology 34(5): 1257-1266	A multiyear, large-scale comparison of arthropod populations on commercially managed Bt and non-Bt cotton fields	Corporate & Academic	Monsanto Company	na	na	yes	United States	North America	yes	11	Field	Table 3	no	na	cotton	Cry1Ac	Lepidoptera	MON531/757/1076	Bollgard I	not specified	sampled throughout season	not specified	na	na	na	na	na	na	no	na	na	Arthropoda	Arachnida	Araneae	not specified	not specified	not specified	Araneae	predator	Piercing	na	natural population of variable ages	not specified	Chronic toxicology	South Alabama
382	12	Head et al. [b]	2005	Environmental Entomology 34(5): 1257-1266	A multiyear, large-scale comparison of arthropod populations on commercially managed Bt and non-Bt cotton fields	Corporate & Academic	Monsanto Company	na	na	yes	United States	North America	yes	12	Field	Table 2	no	na	cotton	Cry1Ac	Lepidoptera	MON531/757/1076	Bollgard I	not specified	sampled throughout season	not specified	na	na	na	na	na	na	no	na	na	Arthropoda	Insecta	Hemiptera	Miridae	Lygus	not specified	Lygus	herbivore	Piercing	na	natural population of variable ages	nymph	Chronic toxicology	South Carolina
383	12	Head et al. [b]	2005	Environmental Entomology 34(5): 1257-1266	A multiyear, large-scale comparison of arthropod populations on commercially managed Bt and non-Bt cotton fields	Corporate & Academic	Monsanto Company	na	na	yes	United States	North America	yes	12	Field	Table 2	no	na	cotton	Cry1Ac	Lepidoptera	MON531/757/1076	Bollgard I	not specified	sampled throughout season	not specified	na	na	na	na	na	na	no	na	na	Arthropoda	Insecta	Hemiptera	Miridae	Lygus	not specified	Lygus	herbivore	Piercing	na	natural population of variable ages	adult	Chronic toxicology	South Carolina
384	12	Head et al. [b]	2005	Environmental Entomology 34(5): 1257-1266	A multiyear, large-scale comparison of arthropod populations on commercially managed Bt and non-Bt cotton fields	Corporate & Academic	Monsanto Company	na	na	yes	United States	North America	yes	12	Field	Table 2	no	na	cotton	Cry1Ac	Lepidoptera	MON531/757/1076	Bollgard I	not specified	sampled throughout season	not specified	na	na	na	na	na	na	no	na	na	Arthropoda	Insecta	Hemiptera	Pentatomidae	not specified	not specified	Pentatomidae	mixed	Piercing	na	natural population of variable ages	nymph	Chronic toxicology	South Carolina
385	12	Head et al. [b]	2005	Environmental Entomology 34(5): 1257-1266	A multiyear, large-scale comparison of arthropod populations on commercially managed Bt and non-Bt cotton fields	Corporate & Academic	Monsanto Company	na	na	yes	United States	North America	yes	12	Field	Table 2	no	na	cotton	Cry1Ac	Lepidoptera	MON531/757/1076	Bollgard I	not specified	sampled throughout season	not specified	na	na	na	na	na	na	no	na	na	Arthropoda	Insecta	Hemiptera	Pentatomidae	not specified	not specified	Pentatomidae	mixed	Piercing	na	natural population of variable ages	adult	Chronic toxicology	South Carolina
386	12	Head et al. [b]	2005	Environmental Entomology 34(5): 1257-1266	A multiyear, large-scale comparison of arthropod populations on commercially managed Bt and non-Bt cotton fields	Corporate & Academic	Monsanto Company	na	na	yes	United States	North America	yes	12	Field	Table 3	no	na	cotton	Cry1Ac	Lepidoptera	MON531/757/1076	Bollgard I	not specified	sampled throughout season	not specified	na	na	na	na	na	na	no	na	na	Arthropoda	Insecta	Hemiptera	Geocoridae	Geocoris	not specified	Geocoris	predator	Piercing	na	natural population of variable ages	nymph	Chronic toxicology	South Carolina
387	12	Head et al. [b]	2005	Environmental Entomology 34(5): 1257-1266	A multiyear, large-scale comparison of arthropod populations on commercially managed Bt and non-Bt cotton fields	Corporate & Academic	Monsanto Company	na	na	yes	United States	North America	yes	12	Field	Table 3	no	na	cotton	Cry1Ac	Lepidoptera	MON531/757/1076	Bollgard I	not specified	sampled throughout season	not specified	na	na	na	na	na	na	no	na	na	Arthropoda	Insecta	Hemiptera	Geocoridae	Geocoris	not specified	Geocoris	predator	Piercing	na	natural population of variable ages	adult	Chronic toxicology	South Carolina
388	12	Head et al. [b]	2005	Environmental Entomology 34(5): 1257-1266	A multiyear, large-scale comparison of arthropod populations on commercially managed Bt and non-Bt cotton fields	Corporate & Academic	Monsanto Company	na	na	yes	United States	North America	yes	12	Field	Table 3	no	na	cotton	Cry1Ac	Lepidoptera	MON531/757/1076	Bollgard I	not specified	sampled throughout season	not specified	na	na	na	na	na	na	no	na	na	Arthropoda	Insecta	Hemiptera	Anthocoridae	Orius	not specified	Orius	predator	Piercing	na	natural population of variable ages	nymph & adult	Chronic toxicology	South Carolina
389	12	Head et al. [b]	2005	Environmental Entomology 34(5): 1257-1266	A multiyear, large-scale comparison of arthropod populations on commercially managed Bt and non-Bt cotton fields	Corporate & Academic	Monsanto Company	na	na	yes	United States	North America	yes	12	Field	Table 3	no	na	cotton	Cry1Ac	Lepidoptera	MON531/757/1076	Bollgard I	not specified	sampled throughout season	not specified	na	na	na	na	na	na	no	na	na	Arthropoda	Insecta	Hemiptera	Nabidae	Nabis	not specified	Nabis	predator	Piercing	na	natural population of variable ages	not specified	Chronic toxicology	South Carolina
390	12	Head et al. [b]	2005	Environmental Entomology 34(5): 1257-1266	A multiyear, large-scale comparison of arthropod populations on commercially managed Bt and non-Bt cotton fields	Corporate & Academic	Monsanto Company	na	na	yes	United States	North America	yes	12	Field	Table 3	no	na	cotton	Cry1Ac	Lepidoptera	MON531/757/1076	Bollgard I	not specified	sampled throughout season	not specified	na	na	na	na	na	na	no	na	na	Arthropoda	Insecta	Neuroptera	Chrysopidae & Hemerobidae	not specified	not specified	Chrysopidae & Hemerobidae	predator	Piercing	na	natural population of variable ages	larva	Chronic toxicology	South Carolina
391	12	Head et al. [b]	2005	Environmental Entomology 34(5): 1257-1266	A multiyear, large-scale comparison of arthropod populations on commercially managed Bt and non-Bt cotton fields	Corporate & Academic	Monsanto Company	na	na	yes	United States	North America	yes	12	Field	Table 3	no	na	cotton	Cry1Ac	Lepidoptera	MON531/757/1076	Bollgard I	not specified	sampled throughout season	not specified	na	na	na	na	na	na	no	na	na	Arthropoda	Insecta	Neuroptera	Chrysopidae & Hemerobidae	not specified	not specified	Chrysopidae & Hemerobidae	predator	Chewing	na	natural population of variable ages	adult	Chronic toxicology	South Carolina
392	12	Head et al. [b]	2005	Environmental Entomology 34(5): 1257-1266	A multiyear, large-scale comparison of arthropod populations on commercially managed Bt and non-Bt cotton fields	Corporate & Academic	Monsanto Company	na	na	yes	United States	North America	yes	12	Field	Table 3	no	na	cotton	Cry1Ac	Lepidoptera	MON531/757/1076	Bollgard I	not specified	sampled throughout season	not specified	na	na	na	na	na	na	no	na	na	Arthropoda	Insecta	Coleoptera	Coccinellidae	not specified	not specified	Coccinellidae	predator	Chewing	na	natural population of variable ages	larva	Chronic toxicology	South Carolina
393	12	Head et al. [b]	2005	Environmental Entomology 34(5): 1257-1266	A multiyear, large-scale comparison of arthropod populations on commercially managed Bt and non-Bt cotton fields	Corporate & Academic	Monsanto Company	na	na	yes	United States	North America	yes	12	Field	Table 3	no	na	cotton	Cry1Ac	Lepidoptera	MON531/757/1076	Bollgard I	not specified	sampled throughout season	not specified	na	na	na	na	na	na	no	na	na	Arthropoda	Insecta	Coleoptera	Coccinellidae	not specified	not specified	Coccinellidae	predator	Chewing	na	natural population of variable ages	adult	Chronic toxicology	South Carolina
394	12	Head et al. [b]	2005	Environmental Entomology 34(5): 1257-1266	A multiyear, large-scale comparison of arthropod populations on commercially managed Bt and non-Bt cotton fields	Corporate & Academic	Monsanto Company	na	na	yes	United States	North America	yes	12	Field	Table 3	no	na	cotton	Cry1Ac	Lepidoptera	MON531/757/1076	Bollgard I	not specified	sampled throughout season	not specified	na	na	na	na	na	na	no	na	na	Arthropoda	Insecta	Hymenoptera	Formicidae	Solenopsis	Solenopsis invicta	Solenopsis invicta	omnivore	Mandibulate-sucking	na	natural population of variable ages	not specified	Chronic toxicology	South Carolina
395	12	Head et al. [b]	2005	Environmental Entomology 34(5): 1257-1266	A multiyear, large-scale comparison of arthropod populations on commercially managed Bt and non-Bt cotton fields	Corporate & Academic	Monsanto Company	na	na	yes	United States	North America	yes	12	Field	Table 3	no	na	cotton	Cry1Ac	Lepidoptera	MON531/757/1076	Bollgard I	not specified	sampled throughout season	not specified	na	na	na	na	na	na	no	na	na	Arthropoda	Arachnida	Araneae	not specified	not specified	not specified	Araneae	predator	Piercing	na	natural population of variable ages	not specified	Chronic toxicology	South Carolina
537	23	Reed et al.	2001	Entomologia Experimentalis et Applicata 100: 89-100	Transgenic Bt potato and conventional insecticides for Colorado potato beetle management: Comparative efficacy and non-target impacts	Corporate & Academic	Monsanto Company, Ecological Technology Center	na	na	yes	United States	North America	yes	1a	Field	Table 2	no	na	potato	Cry3A	Coleoptera	NewLeaf	NewLeaf	Russet Burbank potato	sampled throughout season	28.27	na	cited from EPA document	na	na	na	na	no	na	na	Arthropoda	Insecta	Hemiptera	Aphididae	not specified	not specified	Aphididae	herbivore	Piercing	na	natural population of variable ages	all stages	Chronic toxicology	Hermiston, OR
538	23	Reed et al.	2001	Entomologia Experimentalis et Applicata 100: 89-100	Transgenic Bt potato and conventional insecticides for Colorado potato beetle management: Comparative efficacy and non-target impacts	Corporate & Academic	Monsanto Company, Ecological Technology Center	na	na	yes	United States	North America	yes	1a	Field	Table 2	no	na	potato	Cry3A	Coleoptera	NewLeaf	NewLeaf	Russet Burbank potato	sampled throughout season	28.27	na	cited from EPA document	na	na	na	na	no	na	na	Arthropoda	Insecta	Thysanoptera	not specified	not specified	not specified	Thysanoptera	mixed	Rasping	na	natural population of variable ages	all stages	Chronic toxicology	Hermiston, OR
539	23	Reed et al.	2001	Entomologia Experimentalis et Applicata 100: 89-100	Transgenic Bt potato and conventional insecticides for Colorado potato beetle management: Comparative efficacy and non-target impacts	Corporate & Academic	Monsanto Company, Ecological Technology Center	na	na	yes	United States	North America	yes	1a	Field	Table 2	no	na	potato	Cry3A	Coleoptera	NewLeaf	NewLeaf	Russet Burbank potato	sampled throughout season	28.27	na	cited from EPA document	na	na	na	na	no	na	na	Arthropoda	Insecta	Hemiptera	Miridae	Lygus	not specified	Lygus	herbivore	Piercing	na	natural population of variable ages	all stages	Chronic toxicology	Hermiston, OR
540	23	Reed et al.	2001	Entomologia Experimentalis et Applicata 100: 89-100	Transgenic Bt potato and conventional insecticides for Colorado potato beetle management: Comparative efficacy and non-target impacts	Corporate & Academic	Monsanto Company, Ecological Technology Center	na	na	yes	United States	North America	yes	1a	Field	Table 2	no	na	potato	Cry3A	Coleoptera	NewLeaf	NewLeaf	Russet Burbank potato	sampled throughout season	28.27	na	cited from EPA document	na	na	na	na	no	na	na	Arthropoda	Insecta	Hemiptera	Cicadellidae	not specified	not specified	Cicadellidae	herbivore	Piercing	na	natural population of variable ages	all stages	Chronic toxicology	Hermiston, OR
541	23	Reed et al.	2001	Entomologia Experimentalis et Applicata 100: 89-100	Transgenic Bt potato and conventional insecticides for Colorado potato beetle management: Comparative efficacy and non-target impacts	Corporate & Academic	Monsanto Company, Ecological Technology Center	na	na	yes	United States	North America	yes	1a	Field	Table 2	no	na	potato	Cry3A	Coleoptera	NewLeaf	NewLeaf	Russet Burbank potato	sampled throughout season	28.27	na	cited from EPA document	na	na	na	na	no	na	na	Arthropoda	Insecta	Lepidoptera	Geometridae	not specified	not specified	Geometridae	herbivore	Chewing	na	natural population of variable ages	all stages	Chronic toxicology	Hermiston, OR
542	23	Reed et al.	2001	Entomologia Experimentalis et Applicata 100: 89-100	Transgenic Bt potato and conventional insecticides for Colorado potato beetle management: Comparative efficacy and non-target impacts	Corporate & Academic	Monsanto Company, Ecological Technology Center	na	na	yes	United States	North America	yes	1a	Field	Table 3	no	na	potato	Cry3A	Coleoptera	NewLeaf	NewLeaf	Russet Burbank potato	sampled throughout season	28.27	na	cited from EPA document	na	na	na	na	no	na	na	Arthropoda	Insecta	Hemiptera	Geocoridae	Geocoris	not specified	Geocoris	predator	Piercing	na	natural population of variable ages	all stages	Chronic toxicology	Hermiston, OR
543	23	Reed et al.	2001	Entomologia Experimentalis et Applicata 100: 89-100	Transgenic Bt potato and conventional insecticides for Colorado potato beetle management: Comparative efficacy and non-target impacts	Corporate & Academic	Monsanto Company, Ecological Technology Center	na	na	yes	United States	North America	yes	1a	Field	Table 3	no	na	potato	Cry3A	Coleoptera	NewLeaf	NewLeaf	Russet Burbank potato	sampled throughout season	28.27	na	cited from EPA document	na	na	na	na	no	na	na	Arthropoda	Insecta	Hemiptera	Nabidae	not specified	not specified	Nabidae	predator	Piercing	na	natural population of variable ages	all stages	Chronic toxicology	Hermiston, OR
544	23	Reed et al.	2001	Entomologia Experimentalis et Applicata 100: 89-100	Transgenic Bt potato and conventional insecticides for Colorado potato beetle management: Comparative efficacy and non-target impacts	Corporate & Academic	Monsanto Company, Ecological Technology Center	na	na	yes	United States	North America	yes	1a	Field	Table 3	no	na	potato	Cry3A	Coleoptera	NewLeaf	NewLeaf	Russet Burbank potato	sampled throughout season	28.27	na	cited from EPA document	na	na	na	na	no	na	na	Arthropoda	Insecta	Hemiptera	Anthocoridae	not specified	not specified	Anthocoridae	predator	Piercing	na	natural population of variable ages	all stages	Chronic toxicology	Hermiston, OR
545	23	Reed et al.	2001	Entomologia Experimentalis et Applicata 100: 89-100	Transgenic Bt potato and conventional insecticides for Colorado potato beetle management: Comparative efficacy and non-target impacts	Corporate & Academic	Monsanto Company, Ecological Technology Center	na	na	yes	United States	North America	yes	1a	Field	Table 3	no	na	potato	Cry3A	Coleoptera	NewLeaf	NewLeaf	Russet Burbank potato	sampled throughout season	28.27	na	cited from EPA document	na	na	na	na	no	na	na	Arthropoda	Insecta	Coleoptera	Coccinellidae	not specified	not specified	Coccinellidae	predator	Chewing	na	natural population of variable ages	all stages	Chronic toxicology	Hermiston, OR
546	23	Reed et al.	2001	Entomologia Experimentalis et Applicata 100: 89-100	Transgenic Bt potato and conventional insecticides for Colorado potato beetle management: Comparative efficacy and non-target impacts	Corporate & Academic	Monsanto Company, Ecological Technology Center	na	na	yes	United States	North America	yes	1a	Field	Table 3	no	na	potato	Cry3A	Coleoptera	NewLeaf	NewLeaf	Russet Burbank potato	sampled throughout season	28.27	na	cited from EPA document	na	na	na	na	no	na	na	Arthropoda	Insecta	Neuroptera	Hemerobiidae	Hemerobius	not specified	Hemerobius	predator	Unknown	na	natural population of variable ages	all stages	Chronic toxicology	Hermiston, OR
547	23	Reed et al.	2001	Entomologia Experimentalis et Applicata 100: 89-100	Transgenic Bt potato and conventional insecticides for Colorado potato beetle management: Comparative efficacy and non-target impacts	Corporate & Academic	Monsanto Company, Ecological Technology Center	na	na	yes	United States	North America	yes	1a	Field	Table 3	no	na	potato	Cry3A	Coleoptera	NewLeaf	NewLeaf	Russet Burbank potato	sampled throughout season	28.27	na	cited from EPA document	na	na	na	na	no	na	na	Arthropoda	Insecta	Diptera	Syrphidae	not specified	not specified	Syrphidae	predator	Lapping	na	natural population of variable ages	all stages	Chronic toxicology	Hermiston, OR
548	23	Reed et al.	2001	Entomologia Experimentalis et Applicata 100: 89-100	Transgenic Bt potato and conventional insecticides for Colorado potato beetle management: Comparative efficacy and non-target impacts	Corporate & Academic	Monsanto Company, Ecological Technology Center	na	na	yes	United States	North America	yes	1a	Field	Table 3	no	na	potato	Cry3A	Coleoptera	NewLeaf	NewLeaf	Russet Burbank potato	sampled throughout season	28.27	na	cited from EPA document	na	na	na	na	no	na	na	Arthropoda	Insecta	Hemiptera	Reduviidae	not specified	not specified	Reduviidae	predator	Piercing	na	natural population of variable ages	all stages	Chronic toxicology	Hermiston, OR
549	23	Reed et al.	2001	Entomologia Experimentalis et Applicata 100: 89-100	Transgenic Bt potato and conventional insecticides for Colorado potato beetle management: Comparative efficacy and non-target impacts	Corporate & Academic	Monsanto Company, Ecological Technology Center	na	na	yes	United States	North America	yes	1a	Field	Table 3	no	na	potato	Cry3A	Coleoptera	NewLeaf	NewLeaf	Russet Burbank potato	sampled throughout season	28.27	na	cited from EPA document	na	na	na	na	no	na	na	Arthropoda	Arachnida	Araneae	not specified	not specified	not specified	Araneae	predator	Piercing	na	natural population of variable ages	all stages	Chronic toxicology	Hermiston, OR
550	23	Reed et al.	2001	Entomologia Experimentalis et Applicata 100: 89-100	Transgenic Bt potato and conventional insecticides for Colorado potato beetle management: Comparative efficacy and non-target impacts	Corporate & Academic	Monsanto Company, Ecological Technology Center	na	na	yes	United States	North America	yes	1b	Field	Table 2	no	na	potato	Cry3A	Coleoptera	NewLeaf	NewLeaf	Russet Burbank potato	sampled throughout season	28.27	na	cited from EPA document	na	na	na	na	no	na	na	Arthropoda	Insecta	Hemiptera	Aphididae	not specified	not specified	Aphididae	herbivore	Piercing	EMUE	natural population of variable ages	all stages	Chronic toxicology	Hermiston, OR
551	23	Reed et al.	2001	Entomologia Experimentalis et Applicata 100: 89-100	Transgenic Bt potato and conventional insecticides for Colorado potato beetle management: Comparative efficacy and non-target impacts	Corporate & Academic	Monsanto Company, Ecological Technology Center	na	na	yes	United States	North America	yes	1b	Field	Table 2	no	na	potato	Cry3A	Coleoptera	NewLeaf	NewLeaf	Russet Burbank potato	sampled throughout season	28.27	na	cited from EPA document	na	na	na	na	no	na	na	Arthropoda	Insecta	Thysanoptera	not specified	not specified	not specified	Thysanoptera	mixed	Rasping	EMUE	natural population of variable ages	all stages	Chronic toxicology	Hermiston, OR
552	23	Reed et al.	2001	Entomologia Experimentalis et Applicata 100: 89-100	Transgenic Bt potato and conventional insecticides for Colorado potato beetle management: Comparative efficacy and non-target impacts	Corporate & Academic	Monsanto Company, Ecological Technology Center	na	na	yes	United States	North America	yes	1b	Field	Table 2	no	na	potato	Cry3A	Coleoptera	NewLeaf	NewLeaf	Russet Burbank potato	sampled throughout season	28.27	na	cited from EPA document	na	na	na	na	no	na	na	Arthropoda	Insecta	Hemiptera	Miridae	Lygus	not specified	Lygus	herbivore	Piercing	EMUE	natural population of variable ages	all stages	Chronic toxicology	Hermiston, OR
553	23	Reed et al.	2001	Entomologia Experimentalis et Applicata 100: 89-100	Transgenic Bt potato and conventional insecticides for Colorado potato beetle management: Comparative efficacy and non-target impacts	Corporate & Academic	Monsanto Company, Ecological Technology Center	na	na	yes	United States	North America	yes	1b	Field	Table 2	no	na	potato	Cry3A	Coleoptera	NewLeaf	NewLeaf	Russet Burbank potato	sampled throughout season	28.27	na	cited from EPA document	na	na	na	na	no	na	na	Arthropoda	Insecta	Hemiptera	Cicadellidae	not specified	not specified	Cicadellidae	herbivore	Piercing	EMUE	natural population of variable ages	all stages	Chronic toxicology	Hermiston, OR
554	23	Reed et al.	2001	Entomologia Experimentalis et Applicata 100: 89-100	Transgenic Bt potato and conventional insecticides for Colorado potato beetle management: Comparative efficacy and non-target impacts	Corporate & Academic	Monsanto Company, Ecological Technology Center	na	na	yes	United States	North America	yes	1b	Field	Table 2	no	na	potato	Cry3A	Coleoptera	NewLeaf	NewLeaf	Russet Burbank potato	sampled throughout season	28.27	na	cited from EPA document	na	na	na	na	no	na	na	Arthropoda	Insecta	Lepidoptera	Geometridae	not specified	not specified	Geometridae	herbivore	Chewing	EMUE	natural population of variable ages	all stages	Chronic toxicology	Hermiston, OR
555	23	Reed et al.	2001	Entomologia Experimentalis et Applicata 100: 89-100	Transgenic Bt potato and conventional insecticides for Colorado potato beetle management: Comparative efficacy and non-target impacts	Corporate & Academic	Monsanto Company, Ecological Technology Center	na	na	yes	United States	North America	yes	1b	Field	Table 3	no	na	potato	Cry3A	Coleoptera	NewLeaf	NewLeaf	Russet Burbank potato	sampled throughout season	28.27	na	cited from EPA document	na	na	na	na	no	na	na	Arthropoda	Insecta	Hemiptera	Geocoridae	Geocoris	not specified	Geocoris	predator	Piercing	EMUE	natural population of variable ages	all stages	Chronic toxicology	Hermiston, OR
556	23	Reed et al.	2001	Entomologia Experimentalis et Applicata 100: 89-100	Transgenic Bt potato and conventional insecticides for Colorado potato beetle management: Comparative efficacy and non-target impacts	Corporate & Academic	Monsanto Company, Ecological Technology Center	na	na	yes	United States	North America	yes	1b	Field	Table 3	no	na	potato	Cry3A	Coleoptera	NewLeaf	NewLeaf	Russet Burbank potato	sampled throughout season	28.27	na	cited from EPA document	na	na	na	na	no	na	na	Arthropoda	Insecta	Hemiptera	Nabidae	not specified	not specified	Nabidae	predator	Piercing	EMUE	natural population of variable ages	all stages	Chronic toxicology	Hermiston, OR
557	23	Reed et al.	2001	Entomologia Experimentalis et Applicata 100: 89-100	Transgenic Bt potato and conventional insecticides for Colorado potato beetle management: Comparative efficacy and non-target impacts	Corporate & Academic	Monsanto Company, Ecological Technology Center	na	na	yes	United States	North America	yes	1b	Field	Table 3	no	na	potato	Cry3A	Coleoptera	NewLeaf	NewLeaf	Russet Burbank potato	sampled throughout season	28.27	na	cited from EPA document	na	na	na	na	no	na	na	Arthropoda	Insecta	Hemiptera	Anthocoridae	not specified	not specified	Anthocoridae	predator	Piercing	EMUE	natural population of variable ages	all stages	Chronic toxicology	Hermiston, OR
558	23	Reed et al.	2001	Entomologia Experimentalis et Applicata 100: 89-100	Transgenic Bt potato and conventional insecticides for Colorado potato beetle management: Comparative efficacy and non-target impacts	Corporate & Academic	Monsanto Company, Ecological Technology Center	na	na	yes	United States	North America	yes	1b	Field	Table 3	no	na	potato	Cry3A	Coleoptera	NewLeaf	NewLeaf	Russet Burbank potato	sampled throughout season	28.27	na	cited from EPA document	na	na	na	na	no	na	na	Arthropoda	Insecta	Coleoptera	Coccinellidae	not specified	not specified	Coccinellidae	predator	Chewing	EMUE	natural population of variable ages	all stages	Chronic toxicology	Hermiston, OR
559	23	Reed et al.	2001	Entomologia Experimentalis et Applicata 100: 89-100	Transgenic Bt potato and conventional insecticides for Colorado potato beetle management: Comparative efficacy and non-target impacts	Corporate & Academic	Monsanto Company, Ecological Technology Center	na	na	yes	United States	North America	yes	1b	Field	Table 3	no	na	potato	Cry3A	Coleoptera	NewLeaf	NewLeaf	Russet Burbank potato	sampled throughout season	28.27	na	cited from EPA document	na	na	na	na	no	na	na	Arthropoda	Insecta	Neuroptera	Hemerobiidae	Hemerobius	not specified	Hemerobius	predator	Unknown	EMUE	natural population of variable ages	all stages	Chronic toxicology	Hermiston, OR
560	23	Reed et al.	2001	Entomologia Experimentalis et Applicata 100: 89-100	Transgenic Bt potato and conventional insecticides for Colorado potato beetle management: Comparative efficacy and non-target impacts	Corporate & Academic	Monsanto Company, Ecological Technology Center	na	na	yes	United States	North America	yes	1b	Field	Table 3	no	na	potato	Cry3A	Coleoptera	NewLeaf	NewLeaf	Russet Burbank potato	sampled throughout season	28.27	na	cited from EPA document	na	na	na	na	no	na	na	Arthropoda	Insecta	Diptera	Syrphidae	not specified	not specified	Syrphidae	predator	Lapping	EMUE	natural population of variable ages	all stages	Chronic toxicology	Hermiston, OR
561	23	Reed et al.	2001	Entomologia Experimentalis et Applicata 100: 89-100	Transgenic Bt potato and conventional insecticides for Colorado potato beetle management: Comparative efficacy and non-target impacts	Corporate & Academic	Monsanto Company, Ecological Technology Center	na	na	yes	United States	North America	yes	1b	Field	Table 3	no	na	potato	Cry3A	Coleoptera	NewLeaf	NewLeaf	Russet Burbank potato	sampled throughout season	28.27	na	cited from EPA document	na	na	na	na	no	na	na	Arthropoda	Insecta	Hemiptera	Reduviidae	not specified	not specified	Reduviidae	predator	Piercing	EMUE	natural population of variable ages	all stages	Chronic toxicology	Hermiston, OR
562	23	Reed et al.	2001	Entomologia Experimentalis et Applicata 100: 89-100	Transgenic Bt potato and conventional insecticides for Colorado potato beetle management: Comparative efficacy and non-target impacts	Corporate & Academic	Monsanto Company, Ecological Technology Center	na	na	yes	United States	North America	yes	1b	Field	Table 3	no	na	potato	Cry3A	Coleoptera	NewLeaf	NewLeaf	Russet Burbank potato	sampled throughout season	28.27	na	cited from EPA document	na	na	na	na	no	na	na	Arthropoda	Arachnida	Araneae	not specified	not specified	not specified	Araneae	predator	Piercing	EMUE	natural population of variable ages	all stages	Chronic toxicology	Hermiston, OR
563	23	Reed et al.	2001	Entomologia Experimentalis et Applicata 100: 89-100	Transgenic Bt potato and conventional insecticides for Colorado potato beetle management: Comparative efficacy and non-target impacts	Corporate & Academic	Monsanto Company, Ecological Technology Center	na	na	yes	United States	North America	yes	1c	Field	Table 2	no	na	potato	Cry3A	Coleoptera	NewLeaf	NewLeaf	Russet Burbank potato	sampled throughout season	28.27	na	cited from EPA document	na	na	na	na	no	na	na	Arthropoda	Insecta	Hemiptera	Aphididae	not specified	not specified	Aphididae	herbivore	Piercing	EMUE	natural population of variable ages	all stages	Chronic toxicology	Hermiston, OR
564	23	Reed et al.	2001	Entomologia Experimentalis et Applicata 100: 89-100	Transgenic Bt potato and conventional insecticides for Colorado potato beetle management: Comparative efficacy and non-target impacts	Corporate & Academic	Monsanto Company, Ecological Technology Center	na	na	yes	United States	North America	yes	1c	Field	Table 2	no	na	potato	Cry3A	Coleoptera	NewLeaf	NewLeaf	Russet Burbank potato	sampled throughout season	28.27	na	cited from EPA document	na	na	na	na	no	na	na	Arthropoda	Insecta	Thysanoptera	not specified	not specified	not specified	Thysanoptera	mixed	Rasping	EMUE	natural population of variable ages	all stages	Chronic toxicology	Hermiston, OR
565	23	Reed et al.	2001	Entomologia Experimentalis et Applicata 100: 89-100	Transgenic Bt potato and conventional insecticides for Colorado potato beetle management: Comparative efficacy and non-target impacts	Corporate & Academic	Monsanto Company, Ecological Technology Center	na	na	yes	United States	North America	yes	1c	Field	Table 2	no	na	potato	Cry3A	Coleoptera	NewLeaf	NewLeaf	Russet Burbank potato	sampled throughout season	28.27	na	cited from EPA document	na	na	na	na	no	na	na	Arthropoda	Insecta	Hemiptera	Miridae	Lygus	not specified	Lygus	herbivore	Piercing	EMUE	natural population of variable ages	all stages	Chronic toxicology	Hermiston, OR
566	23	Reed et al.	2001	Entomologia Experimentalis et Applicata 100: 89-100	Transgenic Bt potato and conventional insecticides for Colorado potato beetle management: Comparative efficacy and non-target impacts	Corporate & Academic	Monsanto Company, Ecological Technology Center	na	na	yes	United States	North America	yes	1c	Field	Table 2	no	na	potato	Cry3A	Coleoptera	NewLeaf	NewLeaf	Russet Burbank potato	sampled throughout season	28.27	na	cited from EPA document	na	na	na	na	no	na	na	Arthropoda	Insecta	Hemiptera	Cicadellidae	not specified	not specified	Cicadellidae	herbivore	Piercing	EMUE	natural population of variable ages	all stages	Chronic toxicology	Hermiston, OR
567	23	Reed et al.	2001	Entomologia Experimentalis et Applicata 100: 89-100	Transgenic Bt potato and conventional insecticides for Colorado potato beetle management: Comparative efficacy and non-target impacts	Corporate & Academic	Monsanto Company, Ecological Technology Center	na	na	yes	United States	North America	yes	1c	Field	Table 2	no	na	potato	Cry3A	Coleoptera	NewLeaf	NewLeaf	Russet Burbank potato	sampled throughout season	28.27	na	cited from EPA document	na	na	na	na	no	na	na	Arthropoda	Insecta	Lepidoptera	Geometridae	not specified	not specified	Geometridae	herbivore	Chewing	EMUE	natural population of variable ages	all stages	Chronic toxicology	Hermiston, OR
568	23	Reed et al.	2001	Entomologia Experimentalis et Applicata 100: 89-100	Transgenic Bt potato and conventional insecticides for Colorado potato beetle management: Comparative efficacy and non-target impacts	Corporate & Academic	Monsanto Company, Ecological Technology Center	na	na	yes	United States	North America	yes	1c	Field	Table 3	no	na	potato	Cry3A	Coleoptera	NewLeaf	NewLeaf	Russet Burbank potato	sampled throughout season	28.27	na	cited from EPA document	na	na	na	na	no	na	na	Arthropoda	Insecta	Hemiptera	Geocoridae	Geocoris	not specified	Geocoris	predator	Piercing	EMUE	natural population of variable ages	all stages	Chronic toxicology	Hermiston, OR
569	23	Reed et al.	2001	Entomologia Experimentalis et Applicata 100: 89-100	Transgenic Bt potato and conventional insecticides for Colorado potato beetle management: Comparative efficacy and non-target impacts	Corporate & Academic	Monsanto Company, Ecological Technology Center	na	na	yes	United States	North America	yes	1c	Field	Table 3	no	na	potato	Cry3A	Coleoptera	NewLeaf	NewLeaf	Russet Burbank potato	sampled throughout season	28.27	na	cited from EPA document	na	na	na	na	no	na	na	Arthropoda	Insecta	Hemiptera	Nabidae	not specified	not specified	Nabidae	predator	Piercing	EMUE	natural population of variable ages	all stages	Chronic toxicology	Hermiston, OR
570	23	Reed et al.	2001	Entomologia Experimentalis et Applicata 100: 89-100	Transgenic Bt potato and conventional insecticides for Colorado potato beetle management: Comparative efficacy and non-target impacts	Corporate & Academic	Monsanto Company, Ecological Technology Center	na	na	yes	United States	North America	yes	1c	Field	Table 3	no	na	potato	Cry3A	Coleoptera	NewLeaf	NewLeaf	Russet Burbank potato	sampled throughout season	28.27	na	cited from EPA document	na	na	na	na	no	na	na	Arthropoda	Insecta	Hemiptera	Anthocoridae	not specified	not specified	Anthocoridae	predator	Piercing	EMUE	natural population of variable ages	all stages	Chronic toxicology	Hermiston, OR
571	23	Reed et al.	2001	Entomologia Experimentalis et Applicata 100: 89-100	Transgenic Bt potato and conventional insecticides for Colorado potato beetle management: Comparative efficacy and non-target impacts	Corporate & Academic	Monsanto Company, Ecological Technology Center	na	na	yes	United States	North America	yes	1c	Field	Table 3	no	na	potato	Cry3A	Coleoptera	NewLeaf	NewLeaf	Russet Burbank potato	sampled throughout season	28.27	na	cited from EPA document	na	na	na	na	no	na	na	Arthropoda	Insecta	Coleoptera	Coccinellidae	not specified	not specified	Coccinellidae	predator	Chewing	EMUE	natural population of variable ages	all stages	Chronic toxicology	Hermiston, OR
572	23	Reed et al.	2001	Entomologia Experimentalis et Applicata 100: 89-100	Transgenic Bt potato and conventional insecticides for Colorado potato beetle management: Comparative efficacy and non-target impacts	Corporate & Academic	Monsanto Company, Ecological Technology Center	na	na	yes	United States	North America	yes	1c	Field	Table 3	no	na	potato	Cry3A	Coleoptera	NewLeaf	NewLeaf	Russet Burbank potato	sampled throughout season	28.27	na	cited from EPA document	na	na	na	na	no	na	na	Arthropoda	Insecta	Neuroptera	Hemerobiidae	Hemerobius	not specified	Hemerobius	predator	Unknown	EMUE	natural population of variable ages	all stages	Chronic toxicology	Hermiston, OR
573	23	Reed et al.	2001	Entomologia Experimentalis et Applicata 100: 89-100	Transgenic Bt potato and conventional insecticides for Colorado potato beetle management: Comparative efficacy and non-target impacts	Corporate & Academic	Monsanto Company, Ecological Technology Center	na	na	yes	United States	North America	yes	1c	Field	Table 3	no	na	potato	Cry3A	Coleoptera	NewLeaf	NewLeaf	Russet Burbank potato	sampled throughout season	28.27	na	cited from EPA document	na	na	na	na	no	na	na	Arthropoda	Insecta	Diptera	Syrphidae	not specified	not specified	Syrphidae	predator	Lapping	EMUE	natural population of variable ages	all stages	Chronic toxicology	Hermiston, OR
574	23	Reed et al.	2001	Entomologia Experimentalis et Applicata 100: 89-100	Transgenic Bt potato and conventional insecticides for Colorado potato beetle management: Comparative efficacy and non-target impacts	Corporate & Academic	Monsanto Company, Ecological Technology Center	na	na	yes	United States	North America	yes	1c	Field	Table 3	no	na	potato	Cry3A	Coleoptera	NewLeaf	NewLeaf	Russet Burbank potato	sampled throughout season	28.27	na	cited from EPA document	na	na	na	na	no	na	na	Arthropoda	Insecta	Hemiptera	Reduviidae	not specified	not specified	Reduviidae	predator	Piercing	EMUE	natural population of variable ages	all stages	Chronic toxicology	Hermiston, OR
575	23	Reed et al.	2001	Entomologia Experimentalis et Applicata 100: 89-100	Transgenic Bt potato and conventional insecticides for Colorado potato beetle management: Comparative efficacy and non-target impacts	Corporate & Academic	Monsanto Company, Ecological Technology Center	na	na	yes	United States	North America	yes	1c	Field	Table 3	no	na	potato	Cry3A	Coleoptera	NewLeaf	NewLeaf	Russet Burbank potato	sampled throughout season	28.27	na	cited from EPA document	na	na	na	na	no	na	na	Arthropoda	Arachnida	Araneae	not specified	not specified	not specified	Araneae	predator	Piercing	EMUE	natural population of variable ages	all stages	Chronic toxicology	Hermiston, OR
576	23	Reed et al.	2001	Entomologia Experimentalis et Applicata 100: 89-100	Transgenic Bt potato and conventional insecticides for Colorado potato beetle management: Comparative efficacy and non-target impacts	Corporate & Academic	Monsanto Company, Ecological Technology Center	na	na	yes	United States	North America	yes	2a	Field	Table 2	no	na	potato	Cry3A	Coleoptera	NewLeaf	NewLeaf	Russet Burbank potato	sampled throughout season	28.27	na	cited from EPA document	na	na	na	na	no	na	na	Arthropoda	Insecta	Hemiptera	Aphididae	not specified	not specified	Aphididae	herbivore	Piercing	na	natural population of variable ages	all stages	Chronic toxicology	Hermiston, OR
577	23	Reed et al.	2001	Entomologia Experimentalis et Applicata 100: 89-100	Transgenic Bt potato and conventional insecticides for Colorado potato beetle management: Comparative efficacy and non-target impacts	Corporate & Academic	Monsanto Company, Ecological Technology Center	na	na	yes	United States	North America	yes	2a	Field	Table 2	no	na	potato	Cry3A	Coleoptera	NewLeaf	NewLeaf	Russet Burbank potato	sampled throughout season	28.27	na	cited from EPA document	na	na	na	na	no	na	na	Arthropoda	Insecta	Thysanoptera	not specified	not specified	not specified	Thysanoptera	mixed	Rasping	na	natural population of variable ages	all stages	Chronic toxicology	Hermiston, OR
578	23	Reed et al.	2001	Entomologia Experimentalis et Applicata 100: 89-100	Transgenic Bt potato and conventional insecticides for Colorado potato beetle management: Comparative efficacy and non-target impacts	Corporate & Academic	Monsanto Company, Ecological Technology Center	na	na	yes	United States	North America	yes	2a	Field	Table 2	no	na	potato	Cry3A	Coleoptera	NewLeaf	NewLeaf	Russet Burbank potato	sampled throughout season	28.27	na	cited from EPA document	na	na	na	na	no	na	na	Arthropoda	Insecta	Hemiptera	Miridae	Lygus	not specified	Lygus	herbivore	Piercing	na	natural population of variable ages	all stages	Chronic toxicology	Hermiston, OR
579	23	Reed et al.	2001	Entomologia Experimentalis et Applicata 100: 89-100	Transgenic Bt potato and conventional insecticides for Colorado potato beetle management: Comparative efficacy and non-target impacts	Corporate & Academic	Monsanto Company, Ecological Technology Center	na	na	yes	United States	North America	yes	2a	Field	Table 2	no	na	potato	Cry3A	Coleoptera	NewLeaf	NewLeaf	Russet Burbank potato	sampled throughout season	28.27	na	cited from EPA document	na	na	na	na	no	na	na	Arthropoda	Insecta	Hemiptera	Cicadellidae	not specified	not specified	Cicadellidae	herbivore	Piercing	na	natural population of variable ages	all stages	Chronic toxicology	Hermiston, OR
580	23	Reed et al.	2001	Entomologia Experimentalis et Applicata 100: 89-100	Transgenic Bt potato and conventional insecticides for Colorado potato beetle management: Comparative efficacy and non-target impacts	Corporate & Academic	Monsanto Company, Ecological Technology Center	na	na	yes	United States	North America	yes	2a	Field	Table 2	no	na	potato	Cry3A	Coleoptera	NewLeaf	NewLeaf	Russet Burbank potato	sampled throughout season	28.27	na	cited from EPA document	na	na	na	na	no	na	na	Arthropoda	Insecta	Lepidoptera	Geometridae	not specified	not specified	Geometridae	herbivore	Chewing	na	natural population of variable ages	all stages	Chronic toxicology	Hermiston, OR
581	23	Reed et al.	2001	Entomologia Experimentalis et Applicata 100: 89-100	Transgenic Bt potato and conventional insecticides for Colorado potato beetle management: Comparative efficacy and non-target impacts	Corporate & Academic	Monsanto Company, Ecological Technology Center	na	na	yes	United States	North America	yes	2a	Field	Table 2	no	na	potato	Cry3A	Coleoptera	NewLeaf	NewLeaf	Russet Burbank potato	sampled throughout season	28.27	na	cited from EPA document	na	na	na	na	no	na	na	Arthropoda	Insecta	Coleoptera	Cetoniidae	not specified	not specified	Cetoniidae	herbivore	Chewing	na	natural population of variable ages	all stages	Chronic toxicology	Hermiston, OR
582	23	Reed et al.	2001	Entomologia Experimentalis et Applicata 100: 89-100	Transgenic Bt potato and conventional insecticides for Colorado potato beetle management: Comparative efficacy and non-target impacts	Corporate & Academic	Monsanto Company, Ecological Technology Center	na	na	yes	United States	North America	yes	2a	Field	Table 2	no	na	potato	Cry3A	Coleoptera	NewLeaf	NewLeaf	Russet Burbank potato	sampled throughout season	28.27	na	cited from EPA document	na	na	na	na	no	na	na	Arthropoda	Insecta	Coleoptera	Cetoniidae	not specified	not specified	Cetoniidae	herbivore	Chewing	na	natural population of variable ages	all stages	Chronic toxicology	Hermiston, OR
583	23	Reed et al.	2001	Entomologia Experimentalis et Applicata 100: 89-100	Transgenic Bt potato and conventional insecticides for Colorado potato beetle management: Comparative efficacy and non-target impacts	Corporate & Academic	Monsanto Company, Ecological Technology Center	na	na	yes	United States	North America	yes	2a	Field	Table 3	no	na	potato	Cry3A	Coleoptera	NewLeaf	NewLeaf	Russet Burbank potato	sampled throughout season	28.27	na	cited from EPA document	na	na	na	na	no	na	na	Arthropoda	Insecta	Hemiptera	Geocoridae	Geocoris	not specified	Geocoris	predator	Piercing	na	natural population of variable ages	all stages	Chronic toxicology	Hermiston, OR
584	23	Reed et al.	2001	Entomologia Experimentalis et Applicata 100: 89-100	Transgenic Bt potato and conventional insecticides for Colorado potato beetle management: Comparative efficacy and non-target impacts	Corporate & Academic	Monsanto Company, Ecological Technology Center	na	na	yes	United States	North America	yes	2a	Field	Table 3	no	na	potato	Cry3A	Coleoptera	NewLeaf	NewLeaf	Russet Burbank potato	sampled throughout season	28.27	na	cited from EPA document	na	na	na	na	no	na	na	Arthropoda	Insecta	Hemiptera	Nabidae	not specified	not specified	Nabidae	predator	Piercing	na	natural population of variable ages	all stages	Chronic toxicology	Hermiston, OR
585	23	Reed et al.	2001	Entomologia Experimentalis et Applicata 100: 89-100	Transgenic Bt potato and conventional insecticides for Colorado potato beetle management: Comparative efficacy and non-target impacts	Corporate & Academic	Monsanto Company, Ecological Technology Center	na	na	yes	United States	North America	yes	2a	Field	Table 3	no	na	potato	Cry3A	Coleoptera	NewLeaf	NewLeaf	Russet Burbank potato	sampled throughout season	28.27	na	cited from EPA document	na	na	na	na	no	na	na	Arthropoda	Insecta	Hemiptera	Anthocoridae	not specified	not specified	Anthocoridae	predator	Piercing	na	natural population of variable ages	all stages	Chronic toxicology	Hermiston, OR
586	23	Reed et al.	2001	Entomologia Experimentalis et Applicata 100: 89-100	Transgenic Bt potato and conventional insecticides for Colorado potato beetle management: Comparative efficacy and non-target impacts	Corporate & Academic	Monsanto Company, Ecological Technology Center	na	na	yes	United States	North America	yes	2a	Field	Table 3	no	na	potato	Cry3A	Coleoptera	NewLeaf	NewLeaf	Russet Burbank potato	sampled throughout season	28.27	na	cited from EPA document	na	na	na	na	no	na	na	Arthropoda	Insecta	Coleoptera	Coccinellidae	not specified	not specified	Coccinellidae	predator	Chewing	na	natural population of variable ages	all stages	Chronic toxicology	Hermiston, OR
587	23	Reed et al.	2001	Entomologia Experimentalis et Applicata 100: 89-100	Transgenic Bt potato and conventional insecticides for Colorado potato beetle management: Comparative efficacy and non-target impacts	Corporate & Academic	Monsanto Company, Ecological Technology Center	na	na	yes	United States	North America	yes	2a	Field	Table 3	no	na	potato	Cry3A	Coleoptera	NewLeaf	NewLeaf	Russet Burbank potato	sampled throughout season	28.27	na	cited from EPA document	na	na	na	na	no	na	na	Arthropoda	Insecta	Neuroptera	Hemerobiidae	Hemerobius	not specified	Hemerobius	predator	Unknown	na	natural population of variable ages	all stages	Chronic toxicology	Hermiston, OR
588	23	Reed et al.	2001	Entomologia Experimentalis et Applicata 100: 89-100	Transgenic Bt potato and conventional insecticides for Colorado potato beetle management: Comparative efficacy and non-target impacts	Corporate & Academic	Monsanto Company, Ecological Technology Center	na	na	yes	United States	North America	yes	2a	Field	Table 3	no	na	potato	Cry3A	Coleoptera	NewLeaf	NewLeaf	Russet Burbank potato	sampled throughout season	28.27	na	cited from EPA document	na	na	na	na	no	na	na	Arthropoda	Insecta	Diptera	Syrphidae	not specified	not specified	Syrphidae	predator	Lapping	na	natural population of variable ages	all stages	Chronic toxicology	Hermiston, OR
589	23	Reed et al.	2001	Entomologia Experimentalis et Applicata 100: 89-100	Transgenic Bt potato and conventional insecticides for Colorado potato beetle management: Comparative efficacy and non-target impacts	Corporate & Academic	Monsanto Company, Ecological Technology Center	na	na	yes	United States	North America	yes	2a	Field	Table 3	no	na	potato	Cry3A	Coleoptera	NewLeaf	NewLeaf	Russet Burbank potato	sampled throughout season	28.27	na	cited from EPA document	na	na	na	na	no	na	na	Arthropoda	Arachnida	Araneae	not specified	not specified	not specified	Araneae	predator	Piercing	na	natural population of variable ages	all stages	Chronic toxicology	Hermiston, OR
590	23	Reed et al.	2001	Entomologia Experimentalis et Applicata 100: 89-100	Transgenic Bt potato and conventional insecticides for Colorado potato beetle management: Comparative efficacy and non-target impacts	Corporate & Academic	Monsanto Company, Ecological Technology Center	na	na	yes	United States	North America	yes	2b	Field	Table 2	no	na	potato	Cry3A	Coleoptera	NewLeaf	NewLeaf	Russet Burbank potato	sampled throughout season	28.27	na	cited from EPA document	na	na	na	na	no	na	na	Arthropoda	Insecta	Hemiptera	Aphididae	not specified	not specified	Aphididae	herbivore	Piercing	EMUE	natural population of variable ages	all stages	Chronic toxicology	Hermiston, OR
591	23	Reed et al.	2001	Entomologia Experimentalis et Applicata 100: 89-100	Transgenic Bt potato and conventional insecticides for Colorado potato beetle management: Comparative efficacy and non-target impacts	Corporate & Academic	Monsanto Company, Ecological Technology Center	na	na	yes	United States	North America	yes	2b	Field	Table 2	no	na	potato	Cry3A	Coleoptera	NewLeaf	NewLeaf	Russet Burbank potato	sampled throughout season	28.27	na	cited from EPA document	na	na	na	na	no	na	na	Arthropoda	Insecta	Thysanoptera	not specified	not specified	not specified	Thysanoptera	mixed	Rasping	EMUE	natural population of variable ages	all stages	Chronic toxicology	Hermiston, OR
592	23	Reed et al.	2001	Entomologia Experimentalis et Applicata 100: 89-100	Transgenic Bt potato and conventional insecticides for Colorado potato beetle management: Comparative efficacy and non-target impacts	Corporate & Academic	Monsanto Company, Ecological Technology Center	na	na	yes	United States	North America	yes	2b	Field	Table 2	no	na	potato	Cry3A	Coleoptera	NewLeaf	NewLeaf	Russet Burbank potato	sampled throughout season	28.27	na	cited from EPA document	na	na	na	na	no	na	na	Arthropoda	Insecta	Hemiptera	Miridae	Lygus	not specified	Lygus	herbivore	Piercing	EMUE	natural population of variable ages	all stages	Chronic toxicology	Hermiston, OR
593	23	Reed et al.	2001	Entomologia Experimentalis et Applicata 100: 89-100	Transgenic Bt potato and conventional insecticides for Colorado potato beetle management: Comparative efficacy and non-target impacts	Corporate & Academic	Monsanto Company, Ecological Technology Center	na	na	yes	United States	North America	yes	2b	Field	Table 2	no	na	potato	Cry3A	Coleoptera	NewLeaf	NewLeaf	Russet Burbank potato	sampled throughout season	28.27	na	cited from EPA document	na	na	na	na	no	na	na	Arthropoda	Insecta	Hemiptera	Cicadellidae	not specified	not specified	Cicadellidae	herbivore	Piercing	EMUE	natural population of variable ages	all stages	Chronic toxicology	Hermiston, OR
594	23	Reed et al.	2001	Entomologia Experimentalis et Applicata 100: 89-100	Transgenic Bt potato and conventional insecticides for Colorado potato beetle management: Comparative efficacy and non-target impacts	Corporate & Academic	Monsanto Company, Ecological Technology Center	na	na	yes	United States	North America	yes	2b	Field	Table 2	no	na	potato	Cry3A	Coleoptera	NewLeaf	NewLeaf	Russet Burbank potato	sampled throughout season	28.27	na	cited from EPA document	na	na	na	na	no	na	na	Arthropoda	Insecta	Lepidoptera	Geometridae	not specified	not specified	Geometridae	herbivore	Chewing	EMUE	natural population of variable ages	all stages	Chronic toxicology	Hermiston, OR
595	23	Reed et al.	2001	Entomologia Experimentalis et Applicata 100: 89-100	Transgenic Bt potato and conventional insecticides for Colorado potato beetle management: Comparative efficacy and non-target impacts	Corporate & Academic	Monsanto Company, Ecological Technology Center	na	na	yes	United States	North America	yes	2b	Field	Table 2	no	na	potato	Cry3A	Coleoptera	NewLeaf	NewLeaf	Russet Burbank potato	sampled throughout season	28.27	na	cited from EPA document	na	na	na	na	no	na	na	Arthropoda	Insecta	Coleoptera	Cetoniidae	not specified	not specified	Cetoniidae	herbivore	Chewing	EMUE	natural population of variable ages	all stages	Chronic toxicology	Hermiston, OR
596	23	Reed et al.	2001	Entomologia Experimentalis et Applicata 100: 89-100	Transgenic Bt potato and conventional insecticides for Colorado potato beetle management: Comparative efficacy and non-target impacts	Corporate & Academic	Monsanto Company, Ecological Technology Center	na	na	yes	United States	North America	yes	2b	Field	Table 2	no	na	potato	Cry3A	Coleoptera	NewLeaf	NewLeaf	Russet Burbank potato	sampled throughout season	28.27	na	cited from EPA document	na	na	na	na	no	na	na	Arthropoda	Insecta	Coleoptera	Cetoniidae	not specified	not specified	Cetoniidae	herbivore	Chewing	EMUE	natural population of variable ages	all stages	Chronic toxicology	Hermiston, OR
597	23	Reed et al.	2001	Entomologia Experimentalis et Applicata 100: 89-100	Transgenic Bt potato and conventional insecticides for Colorado potato beetle management: Comparative efficacy and non-target impacts	Corporate & Academic	Monsanto Company, Ecological Technology Center	na	na	yes	United States	North America	yes	2b	Field	Table 3	no	na	potato	Cry3A	Coleoptera	NewLeaf	NewLeaf	Russet Burbank potato	sampled throughout season	28.27	na	cited from EPA document	na	na	na	na	no	na	na	Arthropoda	Insecta	Hemiptera	Geocoridae	Geocoris	not specified	Geocoris	predator	Piercing	EMUE	natural population of variable ages	all stages	Chronic toxicology	Hermiston, OR
598	23	Reed et al.	2001	Entomologia Experimentalis et Applicata 100: 89-100	Transgenic Bt potato and conventional insecticides for Colorado potato beetle management: Comparative efficacy and non-target impacts	Corporate & Academic	Monsanto Company, Ecological Technology Center	na	na	yes	United States	North America	yes	2b	Field	Table 3	no	na	potato	Cry3A	Coleoptera	NewLeaf	NewLeaf	Russet Burbank potato	sampled throughout season	28.27	na	cited from EPA document	na	na	na	na	no	na	na	Arthropoda	Insecta	Hemiptera	Nabidae	not specified	not specified	Nabidae	predator	Piercing	EMUE	natural population of variable ages	all stages	Chronic toxicology	Hermiston, OR
599	23	Reed et al.	2001	Entomologia Experimentalis et Applicata 100: 89-100	Transgenic Bt potato and conventional insecticides for Colorado potato beetle management: Comparative efficacy and non-target impacts	Corporate & Academic	Monsanto Company, Ecological Technology Center	na	na	yes	United States	North America	yes	2b	Field	Table 3	no	na	potato	Cry3A	Coleoptera	NewLeaf	NewLeaf	Russet Burbank potato	sampled throughout season	28.27	na	cited from EPA document	na	na	na	na	no	na	na	Arthropoda	Insecta	Hemiptera	Anthocoridae	not specified	not specified	Anthocoridae	predator	Piercing	EMUE	natural population of variable ages	all stages	Chronic toxicology	Hermiston, OR
600	23	Reed et al.	2001	Entomologia Experimentalis et Applicata 100: 89-100	Transgenic Bt potato and conventional insecticides for Colorado potato beetle management: Comparative efficacy and non-target impacts	Corporate & Academic	Monsanto Company, Ecological Technology Center	na	na	yes	United States	North America	yes	2b	Field	Table 3	no	na	potato	Cry3A	Coleoptera	NewLeaf	NewLeaf	Russet Burbank potato	sampled throughout season	28.27	na	cited from EPA document	na	na	na	na	no	na	na	Arthropoda	Insecta	Coleoptera	Coccinellidae	not specified	not specified	Coccinellidae	predator	Chewing	EMUE	natural population of variable ages	all stages	Chronic toxicology	Hermiston, OR
601	23	Reed et al.	2001	Entomologia Experimentalis et Applicata 100: 89-100	Transgenic Bt potato and conventional insecticides for Colorado potato beetle management: Comparative efficacy and non-target impacts	Corporate & Academic	Monsanto Company, Ecological Technology Center	na	na	yes	United States	North America	yes	2b	Field	Table 3	no	na	potato	Cry3A	Coleoptera	NewLeaf	NewLeaf	Russet Burbank potato	sampled throughout season	28.27	na	cited from EPA document	na	na	na	na	no	na	na	Arthropoda	Insecta	Neuroptera	Hemerobiidae	Hemerobius	not specified	Hemerobius	predator	Unknown	EMUE	natural population of variable ages	all stages	Chronic toxicology	Hermiston, OR
602	23	Reed et al.	2001	Entomologia Experimentalis et Applicata 100: 89-100	Transgenic Bt potato and conventional insecticides for Colorado potato beetle management: Comparative efficacy and non-target impacts	Corporate & Academic	Monsanto Company, Ecological Technology Center	na	na	yes	United States	North America	yes	2b	Field	Table 3	no	na	potato	Cry3A	Coleoptera	NewLeaf	NewLeaf	Russet Burbank potato	sampled throughout season	28.27	na	cited from EPA document	na	na	na	na	no	na	na	Arthropoda	Insecta	Diptera	Syrphidae	not specified	not specified	Syrphidae	predator	Lapping	EMUE	natural population of variable ages	all stages	Chronic toxicology	Hermiston, OR
603	23	Reed et al.	2001	Entomologia Experimentalis et Applicata 100: 89-100	Transgenic Bt potato and conventional insecticides for Colorado potato beetle management: Comparative efficacy and non-target impacts	Corporate & Academic	Monsanto Company, Ecological Technology Center	na	na	yes	United States	North America	yes	2b	Field	Table 3	no	na	potato	Cry3A	Coleoptera	NewLeaf	NewLeaf	Russet Burbank potato	sampled throughout season	28.27	na	cited from EPA document	na	na	na	na	no	na	na	Arthropoda	Arachnida	Araneae	not specified	not specified	not specified	Araneae	predator	Piercing	EMUE	natural population of variable ages	all stages	Chronic toxicology	Hermiston, OR
604	23	Reed et al.	2001	Entomologia Experimentalis et Applicata 100: 89-100	Transgenic Bt potato and conventional insecticides for Colorado potato beetle management: Comparative efficacy and non-target impacts	Corporate & Academic	Monsanto Company, Ecological Technology Center	na	na	yes	United States	North America	yes	2c	Field	Table 2	no	na	potato	Cry3A	Coleoptera	NewLeaf	NewLeaf	Russet Burbank potato	sampled throughout season	28.27	na	cited from EPA document	na	na	na	na	no	na	na	Arthropoda	Insecta	Hemiptera	Aphididae	not specified	not specified	Aphididae	herbivore	Piercing	EMUE	natural population of variable ages	all stages	Chronic toxicology	Hermiston, OR
605	23	Reed et al.	2001	Entomologia Experimentalis et Applicata 100: 89-100	Transgenic Bt potato and conventional insecticides for Colorado potato beetle management: Comparative efficacy and non-target impacts	Corporate & Academic	Monsanto Company, Ecological Technology Center	na	na	yes	United States	North America	yes	2c	Field	Table 2	no	na	potato	Cry3A	Coleoptera	NewLeaf	NewLeaf	Russet Burbank potato	sampled throughout season	28.27	na	cited from EPA document	na	na	na	na	no	na	na	Arthropoda	Insecta	Thysanoptera	not specified	not specified	not specified	Thysanoptera	mixed	Rasping	EMUE	natural population of variable ages	all stages	Chronic toxicology	Hermiston, OR
606	23	Reed et al.	2001	Entomologia Experimentalis et Applicata 100: 89-100	Transgenic Bt potato and conventional insecticides for Colorado potato beetle management: Comparative efficacy and non-target impacts	Corporate & Academic	Monsanto Company, Ecological Technology Center	na	na	yes	United States	North America	yes	2c	Field	Table 2	no	na	potato	Cry3A	Coleoptera	NewLeaf	NewLeaf	Russet Burbank potato	sampled throughout season	28.27	na	cited from EPA document	na	na	na	na	no	na	na	Arthropoda	Insecta	Hemiptera	Miridae	Lygus	not specified	Lygus	herbivore	Piercing	EMUE	natural population of variable ages	all stages	Chronic toxicology	Hermiston, OR
607	23	Reed et al.	2001	Entomologia Experimentalis et Applicata 100: 89-100	Transgenic Bt potato and conventional insecticides for Colorado potato beetle management: Comparative efficacy and non-target impacts	Corporate & Academic	Monsanto Company, Ecological Technology Center	na	na	yes	United States	North America	yes	2c	Field	Table 2	no	na	potato	Cry3A	Coleoptera	NewLeaf	NewLeaf	Russet Burbank potato	sampled throughout season	28.27	na	cited from EPA document	na	na	na	na	no	na	na	Arthropoda	Insecta	Hemiptera	Cicadellidae	not specified	not specified	Cicadellidae	herbivore	Piercing	EMUE	natural population of variable ages	all stages	Chronic toxicology	Hermiston, OR
608	23	Reed et al.	2001	Entomologia Experimentalis et Applicata 100: 89-100	Transgenic Bt potato and conventional insecticides for Colorado potato beetle management: Comparative efficacy and non-target impacts	Corporate & Academic	Monsanto Company, Ecological Technology Center	na	na	yes	United States	North America	yes	2c	Field	Table 2	no	na	potato	Cry3A	Coleoptera	NewLeaf	NewLeaf	Russet Burbank potato	sampled throughout season	28.27	na	cited from EPA document	na	na	na	na	no	na	na	Arthropoda	Insecta	Lepidoptera	Geometridae	not specified	not specified	Geometridae	herbivore	Chewing	EMUE	natural population of variable ages	all stages	Chronic toxicology	Hermiston, OR
609	23	Reed et al.	2001	Entomologia Experimentalis et Applicata 100: 89-100	Transgenic Bt potato and conventional insecticides for Colorado potato beetle management: Comparative efficacy and non-target impacts	Corporate & Academic	Monsanto Company, Ecological Technology Center	na	na	yes	United States	North America	yes	2c	Field	Table 2	no	na	potato	Cry3A	Coleoptera	NewLeaf	NewLeaf	Russet Burbank potato	sampled throughout season	28.27	na	cited from EPA document	na	na	na	na	no	na	na	Arthropoda	Insecta	Coleoptera	Cetoniidae	not specified	not specified	Cetoniidae	herbivore	Chewing	EMUE	natural population of variable ages	all stages	Chronic toxicology	Hermiston, OR
610	23	Reed et al.	2001	Entomologia Experimentalis et Applicata 100: 89-100	Transgenic Bt potato and conventional insecticides for Colorado potato beetle management: Comparative efficacy and non-target impacts	Corporate & Academic	Monsanto Company, Ecological Technology Center	na	na	yes	United States	North America	yes	2c	Field	Table 2	no	na	potato	Cry3A	Coleoptera	NewLeaf	NewLeaf	Russet Burbank potato	sampled throughout season	28.27	na	cited from EPA document	na	na	na	na	no	na	na	Arthropoda	Insecta	Coleoptera	Cetoniidae	not specified	not specified	Cetoniidae	herbivore	Chewing	EMUE	natural population of variable ages	all stages	Chronic toxicology	Hermiston, OR
611	23	Reed et al.	2001	Entomologia Experimentalis et Applicata 100: 89-100	Transgenic Bt potato and conventional insecticides for Colorado potato beetle management: Comparative efficacy and non-target impacts	Corporate & Academic	Monsanto Company, Ecological Technology Center	na	na	yes	United States	North America	yes	2c	Field	Table 3	no	na	potato	Cry3A	Coleoptera	NewLeaf	NewLeaf	Russet Burbank potato	sampled throughout season	28.27	na	cited from EPA document	na	na	na	na	no	na	na	Arthropoda	Insecta	Hemiptera	Geocoridae	Geocoris	not specified	Geocoris	predator	Piercing	EMUE	natural population of variable ages	all stages	Chronic toxicology	Hermiston, OR
612	23	Reed et al.	2001	Entomologia Experimentalis et Applicata 100: 89-100	Transgenic Bt potato and conventional insecticides for Colorado potato beetle management: Comparative efficacy and non-target impacts	Corporate & Academic	Monsanto Company, Ecological Technology Center	na	na	yes	United States	North America	yes	2c	Field	Table 3	no	na	potato	Cry3A	Coleoptera	NewLeaf	NewLeaf	Russet Burbank potato	sampled throughout season	28.27	na	cited from EPA document	na	na	na	na	no	na	na	Arthropoda	Insecta	Hemiptera	Nabidae	not specified	not specified	Nabidae	predator	Piercing	EMUE	natural population of variable ages	all stages	Chronic toxicology	Hermiston, OR
613	23	Reed et al.	2001	Entomologia Experimentalis et Applicata 100: 89-100	Transgenic Bt potato and conventional insecticides for Colorado potato beetle management: Comparative efficacy and non-target impacts	Corporate & Academic	Monsanto Company, Ecological Technology Center	na	na	yes	United States	North America	yes	2c	Field	Table 3	no	na	potato	Cry3A	Coleoptera	NewLeaf	NewLeaf	Russet Burbank potato	sampled throughout season	28.27	na	cited from EPA document	na	na	na	na	no	na	na	Arthropoda	Insecta	Hemiptera	Anthocoridae	not specified	not specified	Anthocoridae	predator	Piercing	EMUE	natural population of variable ages	all stages	Chronic toxicology	Hermiston, OR
614	23	Reed et al.	2001	Entomologia Experimentalis et Applicata 100: 89-100	Transgenic Bt potato and conventional insecticides for Colorado potato beetle management: Comparative efficacy and non-target impacts	Corporate & Academic	Monsanto Company, Ecological Technology Center	na	na	yes	United States	North America	yes	2c	Field	Table 3	no	na	potato	Cry3A	Coleoptera	NewLeaf	NewLeaf	Russet Burbank potato	sampled throughout season	28.27	na	cited from EPA document	na	na	na	na	no	na	na	Arthropoda	Insecta	Coleoptera	Coccinellidae	not specified	not specified	Coccinellidae	predator	Chewing	EMUE	natural population of variable ages	all stages	Chronic toxicology	Hermiston, OR
615	23	Reed et al.	2001	Entomologia Experimentalis et Applicata 100: 89-100	Transgenic Bt potato and conventional insecticides for Colorado potato beetle management: Comparative efficacy and non-target impacts	Corporate & Academic	Monsanto Company, Ecological Technology Center	na	na	yes	United States	North America	yes	2c	Field	Table 3	no	na	potato	Cry3A	Coleoptera	NewLeaf	NewLeaf	Russet Burbank potato	sampled throughout season	28.27	na	cited from EPA document	na	na	na	na	no	na	na	Arthropoda	Insecta	Neuroptera	Hemerobiidae	Hemerobius	not specified	Hemerobius	predator	Unknown	EMUE	natural population of variable ages	all stages	Chronic toxicology	Hermiston, OR
616	23	Reed et al.	2001	Entomologia Experimentalis et Applicata 100: 89-100	Transgenic Bt potato and conventional insecticides for Colorado potato beetle management: Comparative efficacy and non-target impacts	Corporate & Academic	Monsanto Company, Ecological Technology Center	na	na	yes	United States	North America	yes	2c	Field	Table 3	no	na	potato	Cry3A	Coleoptera	NewLeaf	NewLeaf	Russet Burbank potato	sampled throughout season	28.27	na	cited from EPA document	na	na	na	na	no	na	na	Arthropoda	Insecta	Diptera	Syrphidae	not specified	not specified	Syrphidae	predator	Lapping	EMUE	natural population of variable ages	all stages	Chronic toxicology	Hermiston, OR
617	23	Reed et al.	2001	Entomologia Experimentalis et Applicata 100: 89-100	Transgenic Bt potato and conventional insecticides for Colorado potato beetle management: Comparative efficacy and non-target impacts	Corporate & Academic	Monsanto Company, Ecological Technology Center	na	na	yes	United States	North America	yes	2c	Field	Table 3	no	na	potato	Cry3A	Coleoptera	NewLeaf	NewLeaf	Russet Burbank potato	sampled throughout season	28.27	na	cited from EPA document	na	na	na	na	no	na	na	Arthropoda	Arachnida	Araneae	not specified	not specified	not specified	Araneae	predator	Piercing	EMUE	natural population of variable ages	all stages	Chronic toxicology	Hermiston, OR
666	28	Jasinski et al.	2003	Environmental Entomology 32(2): 407-413	Select nontarget arthropod abundance in transgenic and nontransgenic field crops in Ohio	Academic	Ohio State University Extension, Integrated Pest Management	na	na	yes	United States	North America	yes	1	Field	Figure 3 (data from author)	no	na	maize	not specified	Lepidoptera	not specified	not specified	not specified	sampled throughout the season	not specified	na	na	na	na	na	na	no	na	na	Arthropoda	Insecta	Coleoptera	Coccinellidae	Coccinella	Coccinella septempunctata	Coccinella septempunctata	predator	Chewing	na	natural population of variable ages	adult	Chronic toxicology	Ohio
667	28	Jasinski et al.	2003	Environmental Entomology 32(2): 407-413	Select nontarget arthropod abundance in transgenic and nontransgenic field crops in Ohio	Academic	Ohio State University Extension, Integrated Pest Management	na	na	yes	United States	North America	yes	1	Field	Figure 3 (data from author)	no	na	maize	not specified	Lepidoptera	not specified	not specified	not specified	sampled throughout the season	not specified	na	na	na	na	na	na	no	na	na	Arthropoda	Insecta	Coleoptera	Coccinellidae	Coleomegilla	Coleomegilla maculata	Coleomegilla maculata	predator	Chewing	na	natural population of variable ages	adult	Chronic toxicology	Ohio
668	28	Jasinski et al.	2003	Environmental Entomology 32(2): 407-413	Select nontarget arthropod abundance in transgenic and nontransgenic field crops in Ohio	Academic	Ohio State University Extension, Integrated Pest Management	na	na	yes	United States	North America	yes	1	Field	Figure 3 (data from author)	no	na	maize	not specified	Lepidoptera	not specified	not specified	not specified	sampled throughout the season	not specified	na	na	na	na	na	na	no	na	na	Arthropoda	Insecta	Coleoptera	Coccinellidae	Harmonia	Harmonia axyridis	Harmonia axyridis	predator	Chewing	na	natural population of variable ages	adult	Chronic toxicology	Ohio
669	28	Jasinski et al.	2003	Environmental Entomology 32(2): 407-413	Select nontarget arthropod abundance in transgenic and nontransgenic field crops in Ohio	Academic	Ohio State University Extension, Integrated Pest Management	na	na	yes	United States	North America	yes	1	Field	Figure 3 (data from author)	no	na	maize	not specified	Lepidoptera	not specified	not specified	not specified	sampled throughout the season	not specified	na	na	na	na	na	na	no	na	na	Arthropoda	Insecta	Coleoptera	Coccinellidae	Cycloneda	Cycloneda munda	Cycloneda munda	predator	Chewing	na	natural population of variable ages	adult	Chronic toxicology	Ohio
670	28	Jasinski et al.	2003	Environmental Entomology 32(2): 407-413	Select nontarget arthropod abundance in transgenic and nontransgenic field crops in Ohio	Academic	Ohio State University Extension, Integrated Pest Management	na	na	yes	United States	North America	yes	1	Field	Figure 3 (data from author)	no	na	maize	not specified	Lepidoptera	not specified	not specified	not specified	sampled throughout the season	not specified	na	na	na	na	na	na	no	na	na	Arthropoda	Insecta	Hemiptera	Anthocoridae	Orius	not specified	Orius	predator	Piercing	na	natural population of variable ages	adult	Chronic toxicology	Ohio
671	28	Jasinski et al.	2003	Environmental Entomology 32(2): 407-413	Select nontarget arthropod abundance in transgenic and nontransgenic field crops in Ohio	Academic	Ohio State University Extension, Integrated Pest Management	na	na	yes	United States	North America	yes	1	Field	Figure 3 (data from author)	no	na	maize	not specified	Lepidoptera	not specified	not specified	not specified	sampled throughout the season	not specified	na	na	na	na	na	na	no	na	na	Arthropoda	Insecta	Hymenoptera	not specified	not specified	not specified	Hymenoptera	parasitoid	Mandibulate-sucking	na	natural population of variable ages	adult	Chronic toxicology	Ohio
672	28	Jasinski et al.	2003	Environmental Entomology 32(2): 407-413	Select nontarget arthropod abundance in transgenic and nontransgenic field crops in Ohio	Academic	Ohio State University Extension, Integrated Pest Management	na	na	yes	United States	North America	yes	1	Field	Figure 3 (data from author)	no	na	maize	not specified	Lepidoptera	not specified	not specified	not specified	sampled throughout the season	not specified	na	na	na	na	na	na	no	na	na	Arthropoda	Arachnida	Araneae	not specified	not specified	not specified	Araneae	predator	Piercing	na	natural population of variable ages	adult	Chronic toxicology	Ohio
673	28	Jasinski et al.	2003	Environmental Entomology 32(2): 407-413	Select nontarget arthropod abundance in transgenic and nontransgenic field crops in Ohio	Academic	Ohio State University Extension, Integrated Pest Management	na	na	yes	United States	North America	yes	1	Field	Figure 3 (data from author)	no	na	maize	not specified	Lepidoptera	not specified	not specified	not specified	sampled throughout the season	not specified	na	na	na	na	na	na	no	na	na	Arthropoda	Arachnida	Acarina	not specified	not specified	not specified	Acarina	herbivore	Unknown	na	natural population of variable ages	adult	Chronic toxicology	Ohio
674	28	Jasinski et al.	2003	Environmental Entomology 32(2): 407-413	Select nontarget arthropod abundance in transgenic and nontransgenic field crops in Ohio	Academic	Ohio State University Extension, Integrated Pest Management	na	na	yes	United States	North America	yes	1	Field	Figure 3 (data from author)	no	na	maize	not specified	Lepidoptera	not specified	not specified	not specified	sampled throughout the season	not specified	na	na	na	na	na	na	no	na	na	Arthropoda	Insecta	Coleoptera	Staphylinidae	not specified	not specified	Staphylinidae	predator	Chewing	na	natural population of variable ages	adult	Chronic toxicology	Ohio
675	28	Jasinski et al.	2003	Environmental Entomology 32(2): 407-413	Select nontarget arthropod abundance in transgenic and nontransgenic field crops in Ohio	Academic	Ohio State University Extension, Integrated Pest Management	na	na	yes	United States	North America	yes	1	Field	Figure 3 (data from author)	no	na	maize	not specified	Lepidoptera	not specified	not specified	not specified	sampled throughout the season	not specified	na	na	na	na	na	na	no	na	na	Arthropoda	Insecta	Coleoptera	Carabidae	not specified	not specified	Carabidae	mixed	Chewing	na	natural population of variable ages	adult	Chronic toxicology	Ohio
676	28	Jasinski et al.	2003	Environmental Entomology 32(2): 407-413	Select nontarget arthropod abundance in transgenic and nontransgenic field crops in Ohio	Academic	Ohio State University Extension, Integrated Pest Management	na	na	yes	United States	North America	yes	1	Field	Figure 3 (data from author)	no	na	maize	not specified	Lepidoptera	not specified	not specified	not specified	sampled throughout the season	not specified	na	na	na	na	na	na	no	na	na	Arthropoda	Insecta	Diptera	Syrphidae	not specified	not specified	Syrphidae	predator	Lapping	na	natural population of variable ages	adult	Chronic toxicology	Ohio
677	28	Jasinski et al.	2003	Environmental Entomology 32(2): 407-413	Select nontarget arthropod abundance in transgenic and nontransgenic field crops in Ohio	Academic	Ohio State University Extension, Integrated Pest Management	na	na	yes	United States	North America	yes	1	Field	Figure 3 (data from author)	no	na	maize	not specified	Lepidoptera	not specified	not specified	not specified	sampled throughout the season	not specified	na	na	na	na	na	na	no	na	na	Arthropoda	Insecta	Neuroptera	Chrysopidae	Chrysoperla	Chrysoperla carnea	Chrysoperla carnea	predator	Piercing	na	natural population of variable ages	larva	Chronic toxicology	Ohio
678	28	Jasinski et al.	2003	Environmental Entomology 32(2): 407-413	Select nontarget arthropod abundance in transgenic and nontransgenic field crops in Ohio	Academic	Ohio State University Extension, Integrated Pest Management	na	na	yes	United States	North America	yes	1	Field	Figure 3 (data from author)	no	na	maize	not specified	Lepidoptera	not specified	not specified	not specified	sampled throughout the season	not specified	na	na	na	na	na	na	no	na	na	Arthropoda	Insecta	Neuroptera	Hemerobiidae	Hemerobius	not specified	Hemerobius	predator	Chewing	na	natural population of variable ages	adult	Chronic toxicology	Ohio
679	28	Jasinski et al.	2003	Environmental Entomology 32(2): 407-413	Select nontarget arthropod abundance in transgenic and nontransgenic field crops in Ohio	Academic	Ohio State University Extension, Integrated Pest Management	na	na	yes	United States	North America	yes	1	Field	Table 1 & data calculations worksheet	no	na	maize	not specified	Lepidoptera	not specified	not specified	not specified	sampled throughout the season	not specified	na	na	na	na	na	na	no	na	na	Arthropoda	Arachnida	Acarina	not specified	not specified	not specified	Acarina	herbivore	Unknown	na	natural population of variable ages	all stages	Chronic toxicology	Ohio
711	31	Musser & Shelton	2003	Journal of Economic Entomology 96(1): 71-80	Bt sweet corn and selective insecticides: Impacts on pests and predators	Academic	Department of Entomology, Cornell University	na	na	yes	United States	North America	yes	1a	Field	Table 5 (data from author)	no	na	maize	Cry1Ab	Lepidoptera	Bt11	GS 0966	Prime Plus	during silk stage	not specified	na	na	na	na	na	na	no	na	na	Arthropoda	Insecta	Coleoptera	Coccinellidae	Coleomegilla & Harmonia	Coleomegilla maculata & Harmonia axyridis	Coleomegilla maculata & Harmonia axyridis	predator	Chewing	na	natural population of variable ages	adult	Chronic toxicology	Geneva, NY
712	31	Musser & Shelton	2003	Journal of Economic Entomology 96(1): 71-80	Bt sweet corn and selective insecticides: Impacts on pests and predators	Academic	Department of Entomology, Cornell University	na	na	yes	United States	North America	yes	1a	Field	Table 5 (data from author)	no	na	maize	Cry1Ab	Lepidoptera	Bt11	GS 0966	Prime Plus	during silk stage	not specified	na	na	na	na	na	na	no	na	na	Arthropoda	Insecta	Coleoptera	Coccinellidae	Coleomegilla & Harmonia	Coleomegilla maculata & Harmonia axyridis	Coleomegilla maculata & Harmonia axyridis	predator	Chewing	na	natural population of variable ages	larva	Chronic toxicology	Geneva, NY
713	31	Musser & Shelton	2003	Journal of Economic Entomology 96(1): 71-80	Bt sweet corn and selective insecticides: Impacts on pests and predators	Academic	Department of Entomology, Cornell University	na	na	yes	United States	North America	yes	1a	Field	Table 5 (data from author)	no	na	maize	Cry1Ab	Lepidoptera	Bt11	GS 0966	Prime Plus	during silk stage	not specified	na	na	na	na	na	na	no	na	na	Arthropoda	Insecta	Hemiptera	Anthocoridae	Orius	Orius insidiosus	Orius insidiosus	predator	Piercing	na	natural population of variable ages	adult	Chronic toxicology	Geneva, NY
714	31	Musser & Shelton	2003	Journal of Economic Entomology 96(1): 71-80	Bt sweet corn and selective insecticides: Impacts on pests and predators	Academic	Department of Entomology, Cornell University	na	na	yes	United States	North America	yes	1a	Field	Table 5 (data from author)	no	na	maize	Cry1Ab	Lepidoptera	Bt11	GS 0966	Prime Plus	during silk stage	not specified	na	na	na	na	na	na	no	na	na	Arthropoda	Insecta	Hemiptera	Anthocoridae	Orius	Orius insidiosus	Orius insidiosus	predator	Piercing	na	natural population of variable ages	nymph	Chronic toxicology	Geneva, NY
715	31	Musser & Shelton	2003	Journal of Economic Entomology 96(1): 71-80	Bt sweet corn and selective insecticides: Impacts on pests and predators	Academic	Department of Entomology, Cornell University	na	na	yes	United States	North America	yes	1b	Field	Table 5 (data from author)	no	na	maize	Cry1Ab	Lepidoptera	Bt11	GS 0966	Prime Plus	during silk stage	not specified	na	na	na	na	na	na	no	na	na	Arthropoda	Insecta	Coleoptera	Coccinellidae	Coleomegilla & Harmonia	Coleomegilla maculata & Harmonia axyridis	Coleomegilla maculata & Harmonia axyridis	predator	Chewing	EMUE	natural population of variable ages	adult	Chronic toxicology	Geneva, NY
716	31	Musser & Shelton	2003	Journal of Economic Entomology 96(1): 71-80	Bt sweet corn and selective insecticides: Impacts on pests and predators	Academic	Department of Entomology, Cornell University	na	na	yes	United States	North America	yes	1b	Field	Table 5 (data from author)	no	na	maize	Cry1Ab	Lepidoptera	Bt11	GS 0966	Prime Plus	during silk stage	not specified	na	na	na	na	na	na	no	na	na	Arthropoda	Insecta	Coleoptera	Coccinellidae	Coleomegilla & Harmonia	Coleomegilla maculata & Harmonia axyridis	Coleomegilla maculata & Harmonia axyridis	predator	Chewing	EMUE	natural population of variable ages	larva	Chronic toxicology	Geneva, NY
717	31	Musser & Shelton	2003	Journal of Economic Entomology 96(1): 71-80	Bt sweet corn and selective insecticides: Impacts on pests and predators	Academic	Department of Entomology, Cornell University	na	na	yes	United States	North America	yes	1b	Field	Table 5 (data from author)	no	na	maize	Cry1Ab	Lepidoptera	Bt11	GS 0966	Prime Plus	during silk stage	not specified	na	na	na	na	na	na	no	na	na	Arthropoda	Insecta	Hemiptera	Anthocoridae	Orius	Orius insidiosus	Orius insidiosus	predator	Piercing	EMUE	natural population of variable ages	adult	Chronic toxicology	Geneva, NY
718	31	Musser & Shelton	2003	Journal of Economic Entomology 96(1): 71-80	Bt sweet corn and selective insecticides: Impacts on pests and predators	Academic	Department of Entomology, Cornell University	na	na	yes	United States	North America	yes	1b	Field	Table 5 (data from author)	no	na	maize	Cry1Ab	Lepidoptera	Bt11	GS 0966	Prime Plus	during silk stage	not specified	na	na	na	na	na	na	no	na	na	Arthropoda	Insecta	Hemiptera	Anthocoridae	Orius	Orius insidiosus	Orius insidiosus	predator	Piercing	EMUE	natural population of variable ages	nymph	Chronic toxicology	Geneva, NY
719	31	Musser & Shelton	2003	Journal of Economic Entomology 96(1): 71-80	Bt sweet corn and selective insecticides: Impacts on pests and predators	Academic	Department of Entomology, Cornell University	na	na	yes	United States	North America	yes	1c	Field	Table 5 (data from author)	no	na	maize	Cry1Ab	Lepidoptera	Bt11	GS 0966	Prime Plus	during silk stage	not specified	na	na	na	na	na	na	no	na	na	Arthropoda	Insecta	Coleoptera	Coccinellidae	Coleomegilla & Harmonia	Coleomegilla maculata & Harmonia axyridis	Coleomegilla maculata & Harmonia axyridis	predator	Chewing	EMUE	natural population of variable ages	adult	Chronic toxicology	Geneva, NY
720	31	Musser & Shelton	2003	Journal of Economic Entomology 96(1): 71-80	Bt sweet corn and selective insecticides: Impacts on pests and predators	Academic	Department of Entomology, Cornell University	na	na	yes	United States	North America	yes	1c	Field	Table 5 (data from author)	no	na	maize	Cry1Ab	Lepidoptera	Bt11	GS 0966	Prime Plus	during silk stage	not specified	na	na	na	na	na	na	no	na	na	Arthropoda	Insecta	Coleoptera	Coccinellidae	Coleomegilla & Harmonia	Coleomegilla maculata & Harmonia axyridis	Coleomegilla maculata & Harmonia axyridis	predator	Chewing	EMUE	natural population of variable ages	larva	Chronic toxicology	Geneva, NY
721	31	Musser & Shelton	2003	Journal of Economic Entomology 96(1): 71-80	Bt sweet corn and selective insecticides: Impacts on pests and predators	Academic	Department of Entomology, Cornell University	na	na	yes	United States	North America	yes	1c	Field	Table 5 (data from author)	no	na	maize	Cry1Ab	Lepidoptera	Bt11	GS 0966	Prime Plus	during silk stage	not specified	na	na	na	na	na	na	no	na	na	Arthropoda	Insecta	Hemiptera	Anthocoridae	Orius	Orius insidiosus	Orius insidiosus	predator	Piercing	EMUE	natural population of variable ages	adult	Chronic toxicology	Geneva, NY
722	31	Musser & Shelton	2003	Journal of Economic Entomology 96(1): 71-80	Bt sweet corn and selective insecticides: Impacts on pests and predators	Academic	Department of Entomology, Cornell University	na	na	yes	United States	North America	yes	1c	Field	Table 5 (data from author)	no	na	maize	Cry1Ab	Lepidoptera	Bt11	GS 0966	Prime Plus	during silk stage	not specified	na	na	na	na	na	na	no	na	na	Arthropoda	Insecta	Hemiptera	Anthocoridae	Orius	Orius insidiosus	Orius insidiosus	predator	Piercing	EMUE	natural population of variable ages	nymph	Chronic toxicology	Geneva, NY
723	31	Musser & Shelton	2003	Journal of Economic Entomology 96(1): 71-80	Bt sweet corn and selective insecticides: Impacts on pests and predators	Academic	Department of Entomology, Cornell University	na	na	yes	United States	North America	yes	1d	Field	Table 5 (data from author)	no	na	maize	Cry1Ab	Lepidoptera	Bt11	GS 0966	Prime Plus	during silk stage	not specified	na	na	na	na	na	na	no	na	na	Arthropoda	Insecta	Coleoptera	Coccinellidae	Coleomegilla & Harmonia	Coleomegilla maculata & Harmonia axyridis	Coleomegilla maculata & Harmonia axyridis	predator	Chewing	EMUE	natural population of variable ages	adult	Chronic toxicology	Geneva, NY
724	31	Musser & Shelton	2003	Journal of Economic Entomology 96(1): 71-80	Bt sweet corn and selective insecticides: Impacts on pests and predators	Academic	Department of Entomology, Cornell University	na	na	yes	United States	North America	yes	1d	Field	Table 5 (data from author)	no	na	maize	Cry1Ab	Lepidoptera	Bt11	GS 0966	Prime Plus	during silk stage	not specified	na	na	na	na	na	na	no	na	na	Arthropoda	Insecta	Coleoptera	Coccinellidae	Coleomegilla & Harmonia	Coleomegilla maculata & Harmonia axyridis	Coleomegilla maculata & Harmonia axyridis	predator	Chewing	EMUE	natural population of variable ages	larva	Chronic toxicology	Geneva, NY
725	31	Musser & Shelton	2003	Journal of Economic Entomology 96(1): 71-80	Bt sweet corn and selective insecticides: Impacts on pests and predators	Academic	Department of Entomology, Cornell University	na	na	yes	United States	North America	yes	1d	Field	Table 5 (data from author)	no	na	maize	Cry1Ab	Lepidoptera	Bt11	GS 0966	Prime Plus	during silk stage	not specified	na	na	na	na	na	na	no	na	na	Arthropoda	Insecta	Hemiptera	Anthocoridae	Orius	Orius insidiosus	Orius insidiosus	predator	Piercing	EMUE	natural population of variable ages	adult	Chronic toxicology	Geneva, NY
726	31	Musser & Shelton	2003	Journal of Economic Entomology 96(1): 71-80	Bt sweet corn and selective insecticides: Impacts on pests and predators	Academic	Department of Entomology, Cornell University	na	na	yes	United States	North America	yes	1d	Field	Table 5 (data from author)	no	na	maize	Cry1Ab	Lepidoptera	Bt11	GS 0966	Prime Plus	during silk stage	not specified	na	na	na	na	na	na	no	na	na	Arthropoda	Insecta	Hemiptera	Anthocoridae	Orius	Orius insidiosus	Orius insidiosus	predator	Piercing	EMUE	natural population of variable ages	nymph	Chronic toxicology	Geneva, NY
727	31	Musser & Shelton	2003	Journal of Economic Entomology 96(1): 71-80	Bt sweet corn and selective insecticides: Impacts on pests and predators	Academic	Department of Entomology, Cornell University	na	na	yes	United States	North America	yes	1e	Field	Table 5 (data from author)	no	na	maize	Cry1Ab	Lepidoptera	Bt11	GS 0966	Prime Plus	during silk stage	not specified	na	na	na	na	na	na	no	na	na	Arthropoda	Insecta	Coleoptera	Coccinellidae	Coleomegilla & Harmonia	Coleomegilla maculata & Harmonia axyridis	Coleomegilla maculata & Harmonia axyridis	predator	Chewing	EMUE	natural population of variable ages	adult	Chronic toxicology	Geneva, NY
728	31	Musser & Shelton	2003	Journal of Economic Entomology 96(1): 71-80	Bt sweet corn and selective insecticides: Impacts on pests and predators	Academic	Department of Entomology, Cornell University	na	na	yes	United States	North America	yes	1e	Field	Table 5 (data from author)	no	na	maize	Cry1Ab	Lepidoptera	Bt11	GS 0966	Prime Plus	during silk stage	not specified	na	na	na	na	na	na	no	na	na	Arthropoda	Insecta	Coleoptera	Coccinellidae	Coleomegilla & Harmonia	Coleomegilla maculata & Harmonia axyridis	Coleomegilla maculata & Harmonia axyridis	predator	Chewing	EMUE	natural population of variable ages	larva	Chronic toxicology	Geneva, NY
729	31	Musser & Shelton	2003	Journal of Economic Entomology 96(1): 71-80	Bt sweet corn and selective insecticides: Impacts on pests and predators	Academic	Department of Entomology, Cornell University	na	na	yes	United States	North America	yes	1e	Field	Table 5 (data from author)	no	na	maize	Cry1Ab	Lepidoptera	Bt11	GS 0966	Prime Plus	during silk stage	not specified	na	na	na	na	na	na	no	na	na	Arthropoda	Insecta	Hemiptera	Anthocoridae	Orius	Orius insidiosus	Orius insidiosus	predator	Piercing	EMUE	natural population of variable ages	adult	Chronic toxicology	Geneva, NY
730	31	Musser & Shelton	2003	Journal of Economic Entomology 96(1): 71-80	Bt sweet corn and selective insecticides: Impacts on pests and predators	Academic	Department of Entomology, Cornell University	na	na	yes	United States	North America	yes	1e	Field	Table 5 (data from author)	no	na	maize	Cry1Ab	Lepidoptera	Bt11	GS 0966	Prime Plus	during silk stage	not specified	na	na	na	na	na	na	no	na	na	Arthropoda	Insecta	Hemiptera	Anthocoridae	Orius	Orius insidiosus	Orius insidiosus	predator	Piercing	EMUE	natural population of variable ages	nymph	Chronic toxicology	Geneva, NY
731	31	Musser & Shelton	2003	Journal of Economic Entomology 96(1): 71-80	Bt sweet corn and selective insecticides: Impacts on pests and predators	Academic	Department of Entomology, Cornell University	na	na	yes	United States	North America	yes	1f	Field	Table 5 (data from author)	no	na	maize	Cry1Ab	Lepidoptera	Bt11	GS 0966	Prime Plus	during silk stage	not specified	na	na	na	na	na	na	no	na	na	Arthropoda	Insecta	Coleoptera	Coccinellidae	Coleomegilla & Harmonia	Coleomegilla maculata & Harmonia axyridis	Coleomegilla maculata & Harmonia axyridis	predator	Chewing	EMUE	natural population of variable ages	adult	Chronic toxicology	Geneva, NY
732	31	Musser & Shelton	2003	Journal of Economic Entomology 96(1): 71-80	Bt sweet corn and selective insecticides: Impacts on pests and predators	Academic	Department of Entomology, Cornell University	na	na	yes	United States	North America	yes	1f	Field	Table 5 (data from author)	no	na	maize	Cry1Ab	Lepidoptera	Bt11	GS 0966	Prime Plus	during silk stage	not specified	na	na	na	na	na	na	no	na	na	Arthropoda	Insecta	Coleoptera	Coccinellidae	Coleomegilla & Harmonia	Coleomegilla maculata & Harmonia axyridis	Coleomegilla maculata & Harmonia axyridis	predator	Chewing	EMUE	natural population of variable ages	larva	Chronic toxicology	Geneva, NY
733	31	Musser & Shelton	2003	Journal of Economic Entomology 96(1): 71-80	Bt sweet corn and selective insecticides: Impacts on pests and predators	Academic	Department of Entomology, Cornell University	na	na	yes	United States	North America	yes	1f	Field	Table 5 (data from author)	no	na	maize	Cry1Ab	Lepidoptera	Bt11	GS 0966	Prime Plus	during silk stage	not specified	na	na	na	na	na	na	no	na	na	Arthropoda	Insecta	Hemiptera	Anthocoridae	Orius	Orius insidiosus	Orius insidiosus	predator	Piercing	EMUE	natural population of variable ages	adult	Chronic toxicology	Geneva, NY
734	31	Musser & Shelton	2003	Journal of Economic Entomology 96(1): 71-80	Bt sweet corn and selective insecticides: Impacts on pests and predators	Academic	Department of Entomology, Cornell University	na	na	yes	United States	North America	yes	1f	Field	Table 5 (data from author)	no	na	maize	Cry1Ab	Lepidoptera	Bt11	GS 0966	Prime Plus	during silk stage	not specified	na	na	na	na	na	na	no	na	na	Arthropoda	Insecta	Hemiptera	Anthocoridae	Orius	Orius insidiosus	Orius insidiosus	predator	Piercing	EMUE	natural population of variable ages	nymph	Chronic toxicology	Geneva, NY
735	31	Musser & Shelton	2003	Journal of Economic Entomology 96(1): 71-80	Bt sweet corn and selective insecticides: Impacts on pests and predators	Academic	Department of Entomology, Cornell University	na	na	yes	United States	North America	yes	1g	Field	Table 5 (data from author)	no	na	maize	Cry1Ab	Lepidoptera	Bt11	GS 0966	Prime Plus	during silk stage	not specified	na	na	na	na	na	na	no	na	na	Arthropoda	Insecta	Coleoptera	Coccinellidae	Coleomegilla & Harmonia	Coleomegilla maculata & Harmonia axyridis	Coleomegilla maculata & Harmonia axyridis	predator	Chewing	EMUE	natural population of variable ages	adult	Chronic toxicology	Geneva, NY
736	31	Musser & Shelton	2003	Journal of Economic Entomology 96(1): 71-80	Bt sweet corn and selective insecticides: Impacts on pests and predators	Academic	Department of Entomology, Cornell University	na	na	yes	United States	North America	yes	1g	Field	Table 5 (data from author)	no	na	maize	Cry1Ab	Lepidoptera	Bt11	GS 0966	Prime Plus	during silk stage	not specified	na	na	na	na	na	na	no	na	na	Arthropoda	Insecta	Coleoptera	Coccinellidae	Coleomegilla & Harmonia	Coleomegilla maculata & Harmonia axyridis	Coleomegilla maculata & Harmonia axyridis	predator	Chewing	EMUE	natural population of variable ages	larva	Chronic toxicology	Geneva, NY
737	31	Musser & Shelton	2003	Journal of Economic Entomology 96(1): 71-80	Bt sweet corn and selective insecticides: Impacts on pests and predators	Academic	Department of Entomology, Cornell University	na	na	yes	United States	North America	yes	1g	Field	Table 5 (data from author)	no	na	maize	Cry1Ab	Lepidoptera	Bt11	GS 0966	Prime Plus	during silk stage	not specified	na	na	na	na	na	na	no	na	na	Arthropoda	Insecta	Hemiptera	Anthocoridae	Orius	Orius insidiosus	Orius insidiosus	predator	Piercing	EMUE	natural population of variable ages	adult	Chronic toxicology	Geneva, NY
738	31	Musser & Shelton	2003	Journal of Economic Entomology 96(1): 71-80	Bt sweet corn and selective insecticides: Impacts on pests and predators	Academic	Department of Entomology, Cornell University	na	na	yes	United States	North America	yes	1g	Field	Table 5 (data from author)	no	na	maize	Cry1Ab	Lepidoptera	Bt11	GS 0966	Prime Plus	during silk stage	not specified	na	na	na	na	na	na	no	na	na	Arthropoda	Insecta	Hemiptera	Anthocoridae	Orius	Orius insidiosus	Orius insidiosus	predator	Piercing	EMUE	natural population of variable ages	nymph	Chronic toxicology	Geneva, NY
740	31	Musser & Shelton	2003	Journal of Economic Entomology 96(1): 71-80	Bt sweet corn and selective insecticides: Impacts on pests and predators	Academic	Department of Entomology, Cornell University	na	na	yes	United States	North America	yes	2a	Field	Table 7 (data from author)	no	na	maize	Cry1Ab	Lepidoptera	Bt11	GS 0966	Prime Plus	during silk and blister stages	not specified	na	na	na	na	na	na	no	na	na	Arthropoda	Insecta	Hemiptera	Anthocoridae	Orius	Orius insidiosus	Orius insidiosus	predator	Piercing	na	natural population of variable ages	all stages	Chronic toxicology	Geneva, NY
743	31	Musser & Shelton	2003	Journal of Economic Entomology 96(1): 71-80	Bt sweet corn and selective insecticides: Impacts on pests and predators	Academic	Department of Entomology, Cornell University	na	na	yes	United States	North America	yes	2b	Field	Table 7 (data from author)	no	na	maize	Cry1Ab	Lepidoptera	Bt11	GS 0966	Prime Plus	during silk and blister stages	not specified	na	na	na	na	na	na	no	na	na	Arthropoda	Insecta	Hemiptera	Anthocoridae	Orius	Orius insidiosus	Orius insidiosus	predator	Piercing	na	natural population of variable ages	all stages	Chronic toxicology	Geneva, NY
746	31	Musser & Shelton	2003	Journal of Economic Entomology 96(1): 71-80	Bt sweet corn and selective insecticides: Impacts on pests and predators	Academic	Department of Entomology, Cornell University	na	na	yes	United States	North America	yes	2c	Field	Table 7 (data from author)	no	na	maize	Cry1Ab	Lepidoptera	Bt11	GS 0966	Prime Plus	during silk and blister stages	not specified	na	na	na	na	na	na	no	na	na	Arthropoda	Insecta	Hemiptera	Anthocoridae	Orius	Orius insidiosus	Orius insidiosus	predator	Piercing	EMUE	natural population of variable ages	all stages	Chronic toxicology	Geneva, NY
749	31	Musser & Shelton	2003	Journal of Economic Entomology 96(1): 71-80	Bt sweet corn and selective insecticides: Impacts on pests and predators	Academic	Department of Entomology, Cornell University	na	na	yes	United States	North America	yes	2d	Field	Table 7 (data from author)	no	na	maize	Cry1Ab	Lepidoptera	Bt11	GS 0966	Prime Plus	during silk and blister stages	not specified	na	na	na	na	na	na	no	na	na	Arthropoda	Insecta	Hemiptera	Anthocoridae	Orius	Orius insidiosus	Orius insidiosus	predator	Piercing	EMUE	natural population of variable ages	all stages	Chronic toxicology	Geneva, NY
752	31	Musser & Shelton	2003	Journal of Economic Entomology 96(1): 71-80	Bt sweet corn and selective insecticides: Impacts on pests and predators	Academic	Department of Entomology, Cornell University	na	na	yes	United States	North America	yes	2e	Field	Table 7 (data from author)	no	na	maize	Cry1Ab	Lepidoptera	Bt11	GS 0966	Prime Plus	during silk and blister stages	not specified	na	na	na	na	na	na	no	na	na	Arthropoda	Insecta	Hemiptera	Anthocoridae	Orius	Orius insidiosus	Orius insidiosus	predator	Piercing	EMUE	natural population of variable ages	all stages	Chronic toxicology	Geneva, NY
755	31	Musser & Shelton	2003	Journal of Economic Entomology 96(1): 71-80	Bt sweet corn and selective insecticides: Impacts on pests and predators	Academic	Department of Entomology, Cornell University	na	na	yes	United States	North America	yes	2f	Field	Table 7 (data from author)	no	na	maize	Cry1Ab	Lepidoptera	Bt11	GS 0966	Prime Plus	during silk and blister stages	not specified	na	na	na	na	na	na	no	na	na	Arthropoda	Insecta	Hemiptera	Anthocoridae	Orius	Orius insidiosus	Orius insidiosus	predator	Piercing	EMUE	natural population of variable ages	all stages	Chronic toxicology	Geneva, NY
758	31	Musser & Shelton	2003	Journal of Economic Entomology 96(1): 71-80	Bt sweet corn and selective insecticides: Impacts on pests and predators	Academic	Department of Entomology, Cornell University	na	na	yes	United States	North America	yes	2g	Field	Table 7 (data from author)	no	na	maize	Cry1Ab	Lepidoptera	Bt11	GS 0966	Prime Plus	during silk and blister stages	not specified	na	na	na	na	na	na	no	na	na	Arthropoda	Insecta	Hemiptera	Anthocoridae	Orius	Orius insidiosus	Orius insidiosus	predator	Piercing	EMUE	natural population of variable ages	all stages	Chronic toxicology	Geneva, NY
761	31	Musser & Shelton	2003	Journal of Economic Entomology 96(1): 71-80	Bt sweet corn and selective insecticides: Impacts on pests and predators	Academic	Department of Entomology, Cornell University	na	na	yes	United States	North America	yes	2h	Field	Table 7 (data from author)	no	na	maize	Cry1Ab	Lepidoptera	Bt11	GS 0966	Prime Plus	during silk and blister stages	not specified	na	na	na	na	na	na	no	na	na	Arthropoda	Insecta	Hemiptera	Anthocoridae	Orius	Orius insidiosus	Orius insidiosus	predator	Piercing	EMUE	natural population of variable ages	all stages	Chronic toxicology	Geneva, NY
894	38	Bourguet et al.	2002	Environmental Biosafety Research 1: 49-60	Ostrinia nubilalis parasitism and the field abundance of non-target insects in transgenic Bacillus thuringiensis corn (Zea mays)	Academic	Unite de Recherches de Lutte Biologique, INRA La Miniere	na	na	yes	France	Europe	yes	1	Field	Table 1	no	na	maize	Cry1Ab	Lepidoptera	Bt176	Furio Cb and Occitan Cb	non-transgenic hybrid	4.5-5.5 months after planting	not specified	na	na	na	na	na	na	no	na	na	Arthropoda	Insecta	Diptera	Tachinidae	Lydella & Pseudoperichaeta	Lydella thompsoni & Pseudoperichaeta nigrolineata	Lydella thompsoni & Pseudoperichaeta nigrolineata	parasitoid	Sucking	na	egg	adult	Tritrophic	France: Berat, France; Rieumes, France; Lavelanet, France; Salaise-sur-Sanne, France
895	38	Bourguet et al.	2002	Environmental Biosafety Research 1: 49-60	Ostrinia nubilalis parasitism and the field abundance of non-target insects in transgenic Bacillus thuringiensis corn (Zea mays)	Academic	Unite de Recherches de Lutte Biologique, INRA La Miniere	na	na	yes	France	Europe	yes	2	Field	Table 4	no	na	maize	Cry1Ab	Lepidoptera	MON810	Elgina	Cecilia	sampled throughout season	10.34	na	cited from EPA document	na	na	na	na	no	na	na	Arthropoda	Insecta	Hemiptera	Aphididae	Rhopalosiphum	Rhopalosiphum padi	Rhopalosiphum padi	herbivore	Piercing	na	natural population of variable ages	all stages	Chronic toxicology	Aussonne, France
896	38	Bourguet et al.	2002	Environmental Biosafety Research 1: 49-60	Ostrinia nubilalis parasitism and the field abundance of non-target insects in transgenic Bacillus thuringiensis corn (Zea mays)	Academic	Unite de Recherches de Lutte Biologique, INRA La Miniere	na	na	yes	France	Europe	yes	2	Field	Table 4	no	na	maize	Cry1Ab	Lepidoptera	MON810	Elgina	Cecilia	sampled throughout season	10.34	na	cited from EPA document	na	na	na	na	no	na	na	Arthropoda	Insecta	Hemiptera	Aphididae	Metopolophium	Metopolophium dirhodum	Metopolophium dirhodum	herbivore	Piercing	na	natural population of variable ages	all stages	Chronic toxicology	Aussonne, France
897	38	Bourguet et al.	2002	Environmental Biosafety Research 1: 49-60	Ostrinia nubilalis parasitism and the field abundance of non-target insects in transgenic Bacillus thuringiensis corn (Zea mays)	Academic	Unite de Recherches de Lutte Biologique, INRA La Miniere	na	na	yes	France	Europe	yes	2	Field	Table 4	no	na	maize	Cry1Ab	Lepidoptera	MON810	Elgina	Cecilia	sampled throughout season	10.34	na	cited from EPA document	na	na	na	na	no	na	na	Arthropoda	Insecta	Hemiptera	Aphididae	Sitobion	Sitobion avenae	Sitobion avenae	herbivore	Piercing	na	natural population of variable ages	all stages	Chronic toxicology	Aussonne, France
898	38	Bourguet et al.	2002	Environmental Biosafety Research 1: 49-60	Ostrinia nubilalis parasitism and the field abundance of non-target insects in transgenic Bacillus thuringiensis corn (Zea mays)	Academic	Unite de Recherches de Lutte Biologique, INRA La Miniere	na	na	yes	France	Europe	yes	2	Field	Table 4	no	na	maize	Cry1Ab	Lepidoptera	MON810	Elgina	Cecilia	sampled throughout season	10.34	na	cited from EPA document	na	na	na	na	no	na	na	Arthropoda	Insecta	Hemiptera	Aphididae	not specified	not specified	Aphididae	herbivore	Piercing	na	natural population of variable ages	all stages	Chronic toxicology	Aussonne, France
899	38	Bourguet et al.	2002	Environmental Biosafety Research 1: 49-60	Ostrinia nubilalis parasitism and the field abundance of non-target insects in transgenic Bacillus thuringiensis corn (Zea mays)	Academic	Unite de Recherches de Lutte Biologique, INRA La Miniere	na	na	yes	France	Europe	yes	2	Field	Table 4	no	na	maize	Cry1Ab	Lepidoptera	MON810	Elgina	Cecilia	sampled throughout season	10.34	na	cited from EPA document	na	na	na	na	no	na	na	Arthropoda	Insecta	Coleoptera	Coccinellidae	Coccinella	Coccinella septempunctata	Coccinella septempunctata	predator	Chewing	na	natural population of variable ages	all stages	Chronic toxicology	Aussonne, France
900	38	Bourguet et al.	2002	Environmental Biosafety Research 1: 49-60	Ostrinia nubilalis parasitism and the field abundance of non-target insects in transgenic Bacillus thuringiensis corn (Zea mays)	Academic	Unite de Recherches de Lutte Biologique, INRA La Miniere	na	na	yes	France	Europe	yes	2	Field	Table 4	no	na	maize	Cry1Ab	Lepidoptera	MON810	Elgina	Cecilia	sampled throughout season	10.34	na	cited from EPA document	na	na	na	na	no	na	na	Arthropoda	Insecta	Diptera	Syrphidae	Syrphus	Syrphus corollae	Syrphus corollae	predator	Lapping	na	natural population of variable ages	all stages	Chronic toxicology	Aussonne, France
901	38	Bourguet et al.	2002	Environmental Biosafety Research 1: 49-60	Ostrinia nubilalis parasitism and the field abundance of non-target insects in transgenic Bacillus thuringiensis corn (Zea mays)	Academic	Unite de Recherches de Lutte Biologique, INRA La Miniere	na	na	yes	France	Europe	yes	2	Field	Table 4	no	na	maize	Cry1Ab	Lepidoptera	MON810	Elgina	Cecilia	sampled throughout season	10.34	na	cited from EPA document	na	na	na	na	no	na	na	Arthropoda	Insecta	Neuroptera	Chrysopidae	Chrysoperla	Chrysoperla carnea	Chrysoperla carnea	predator	Unknown	na	natural population of variable ages	all stages	Chronic toxicology	Aussonne, France
902	38	Bourguet et al.	2002	Environmental Biosafety Research 1: 49-60	Ostrinia nubilalis parasitism and the field abundance of non-target insects in transgenic Bacillus thuringiensis corn (Zea mays)	Academic	Unite de Recherches de Lutte Biologique, INRA La Miniere	na	na	yes	France	Europe	yes	2	Field	Table 4	no	na	maize	Cry1Ab	Lepidoptera	MON810	Elgina	Cecilia	sampled throughout season	10.34	na	cited from EPA document	na	na	na	na	no	na	na	Arthropoda	Insecta	Hymenoptera	not specified	not specified	not specified	Hymenoptera	parasitoid	Mandibulate-sucking	na	natural population of variable ages	all stages	Chronic toxicology	Aussonne, France
903	38	Bourguet et al.	2002	Environmental Biosafety Research 1: 49-60	Ostrinia nubilalis parasitism and the field abundance of non-target insects in transgenic Bacillus thuringiensis corn (Zea mays)	Academic	Unite de Recherches de Lutte Biologique, INRA La Miniere	na	na	yes	France	Europe	yes	2	Field	Table 4	no	na	maize	Cry1Ab	Lepidoptera	MON810	Elgina	Cecilia	sampled throughout season	10.34	na	cited from EPA document	na	na	na	na	no	na	na	Arthropoda	Insecta	Thysanoptera	not specified	not specified	not specified	Thysanoptera	mixed	Rasping	na	natural population of variable ages	all stages	Chronic toxicology	Aussonne, France
904	38	Bourguet et al.	2002	Environmental Biosafety Research 1: 49-60	Ostrinia nubilalis parasitism and the field abundance of non-target insects in transgenic Bacillus thuringiensis corn (Zea mays)	Academic	Unite de Recherches de Lutte Biologique, INRA La Miniere	na	na	yes	France	Europe	yes	3	Field	Table 4	no	na	maize	Cry1Ab	Lepidoptera	MON810	Elgina	Cecilia	sampled throughout season	10.34	na	cited from EPA document	na	na	na	na	no	na	na	Arthropoda	Insecta	Hemiptera	Aphididae	Rhopalosiphum	Rhopalosiphum padi	Rhopalosiphum padi	herbivore	Piercing	na	natural population of variable ages	all stages	Chronic toxicology	Montesquieu-Lauragais, France
905	38	Bourguet et al.	2002	Environmental Biosafety Research 1: 49-60	Ostrinia nubilalis parasitism and the field abundance of non-target insects in transgenic Bacillus thuringiensis corn (Zea mays)	Academic	Unite de Recherches de Lutte Biologique, INRA La Miniere	na	na	yes	France	Europe	yes	3	Field	Table 4	no	na	maize	Cry1Ab	Lepidoptera	MON810	Elgina	Cecilia	sampled throughout season	10.34	na	cited from EPA document	na	na	na	na	no	na	na	Arthropoda	Insecta	Hemiptera	Aphididae	Metopolophium	Metopolophium dirhodum	Metopolophium dirhodum	herbivore	Piercing	na	natural population of variable ages	all stages	Chronic toxicology	Montesquieu-Lauragais, France
906	38	Bourguet et al.	2002	Environmental Biosafety Research 1: 49-60	Ostrinia nubilalis parasitism and the field abundance of non-target insects in transgenic Bacillus thuringiensis corn (Zea mays)	Academic	Unite de Recherches de Lutte Biologique, INRA La Miniere	na	na	yes	France	Europe	yes	3	Field	Table 4	no	na	maize	Cry1Ab	Lepidoptera	MON810	Elgina	Cecilia	sampled throughout season	10.34	na	cited from EPA document	na	na	na	na	no	na	na	Arthropoda	Insecta	Hemiptera	Aphididae	Sitobion	Sitobion avenae	Sitobion avenae	herbivore	Piercing	na	natural population of variable ages	all stages	Chronic toxicology	Montesquieu-Lauragais, France
907	38	Bourguet et al.	2002	Environmental Biosafety Research 1: 49-60	Ostrinia nubilalis parasitism and the field abundance of non-target insects in transgenic Bacillus thuringiensis corn (Zea mays)	Academic	Unite de Recherches de Lutte Biologique, INRA La Miniere	na	na	yes	France	Europe	yes	3	Field	Table 4	no	na	maize	Cry1Ab	Lepidoptera	MON810	Elgina	Cecilia	sampled throughout season	10.34	na	cited from EPA document	na	na	na	na	no	na	na	Arthropoda	Insecta	Coleoptera	Coccinellidae	Coccinella	Coccinella septempunctata	Coccinella septempunctata	predator	Chewing	na	natural population of variable ages	all stages	Chronic toxicology	Montesquieu-Lauragais, France
908	38	Bourguet et al.	2002	Environmental Biosafety Research 1: 49-60	Ostrinia nubilalis parasitism and the field abundance of non-target insects in transgenic Bacillus thuringiensis corn (Zea mays)	Academic	Unite de Recherches de Lutte Biologique, INRA La Miniere	na	na	yes	France	Europe	yes	3	Field	Table 4	no	na	maize	Cry1Ab	Lepidoptera	MON810	Elgina	Cecilia	sampled throughout season	10.34	na	cited from EPA document	na	na	na	na	no	na	na	Arthropoda	Insecta	Diptera	Syrphidae	Syrphus	Syrphus corollae	Syrphus corollae	predator	Lapping	na	natural population of variable ages	all stages	Chronic toxicology	Montesquieu-Lauragais, France
909	38	Bourguet et al.	2002	Environmental Biosafety Research 1: 49-60	Ostrinia nubilalis parasitism and the field abundance of non-target insects in transgenic Bacillus thuringiensis corn (Zea mays)	Academic	Unite de Recherches de Lutte Biologique, INRA La Miniere	na	na	yes	France	Europe	yes	3	Field	Table 4	no	na	maize	Cry1Ab	Lepidoptera	MON810	Elgina	Cecilia	sampled throughout season	10.34	na	cited from EPA document	na	na	na	na	no	na	na	Arthropoda	Insecta	Neuroptera	Chrysopidae	Chrysoperla	Chrysoperla carnea	Chrysoperla carnea	predator	Unknown	na	natural population of variable ages	all stages	Chronic toxicology	Montesquieu-Lauragais, France
910	38	Bourguet et al.	2002	Environmental Biosafety Research 1: 49-60	Ostrinia nubilalis parasitism and the field abundance of non-target insects in transgenic Bacillus thuringiensis corn (Zea mays)	Academic	Unite de Recherches de Lutte Biologique, INRA La Miniere	na	na	yes	France	Europe	yes	3	Field	Table 4	no	na	maize	Cry1Ab	Lepidoptera	MON810	Elgina	Cecilia	sampled throughout season	10.34	na	cited from EPA document	na	na	na	na	no	na	na	Arthropoda	Insecta	Hemiptera	Anthocoridae	Orius	Orius insidiosus	Orius insidiosus	predator	Piercing	na	natural population of variable ages	all stages	Chronic toxicology	Montesquieu-Lauragais, France
911	38	Bourguet et al.	2002	Environmental Biosafety Research 1: 49-60	Ostrinia nubilalis parasitism and the field abundance of non-target insects in transgenic Bacillus thuringiensis corn (Zea mays)	Academic	Unite de Recherches de Lutte Biologique, INRA La Miniere	na	na	yes	France	Europe	yes	3	Field	Table 4	no	na	maize	Cry1Ab	Lepidoptera	MON810	Elgina	Cecilia	sampled throughout season	10.34	na	cited from EPA document	na	na	na	na	no	na	na	Arthropoda	Insecta	Hymenoptera	not specified	not specified	not specified	Hymenoptera	parasitoid	Mandibulate-sucking	na	natural population of variable ages	all stages	Chronic toxicology	Montesquieu-Lauragais, France
912	38	Bourguet et al.	2002	Environmental Biosafety Research 1: 49-60	Ostrinia nubilalis parasitism and the field abundance of non-target insects in transgenic Bacillus thuringiensis corn (Zea mays)	Academic	Unite de Recherches de Lutte Biologique, INRA La Miniere	na	na	yes	France	Europe	yes	3	Field	Table 4	no	na	maize	Cry1Ab	Lepidoptera	MON810	Elgina	Cecilia	sampled throughout season	10.34	na	cited from EPA document	na	na	na	na	no	na	na	Arthropoda	Insecta	Thysanoptera	not specified	not specified	not specified	Thysanoptera	mixed	Rasping	na	natural population of variable ages	all stages	Chronic toxicology	Montesquieu-Lauragais, France
934	40	Duan et al. [b]	2004	Environmental Entomology 33(2): 275-281	Effects of transgenic Bacillus thuringiensis potato and conventional insecticides for Colorado potato beetle (Coleoptera: Chrysomelidae) management on the abundance of ground-dwelling arthropods in Oregon potato ecosystems	Corporate & Academic	Monsanto Company	na	na	yes	United States	North America	yes	1a	Field	Table 2	no	na	potato	Cry3A	Coleoptera	NewLeaf	NewLeaf	non-transgenic potato	sampled throughout season	28.27	na	cited from EPA document	na	na	na	na	no	na	na	Arthropoda	Insecta	Coleoptera	Carabidae	not specified	not specified	Carabidae	mixed	Chewing	na	natural population of variable ages	immature and adult	Chronic toxicology	Hermiston, OR
935	40	Duan et al. [b]	2004	Environmental Entomology 33(2): 275-281	Effects of transgenic Bacillus thuringiensis potato and conventional insecticides for Colorado potato beetle (Coleoptera: Chrysomelidae) management on the abundance of ground-dwelling arthropods in Oregon potato ecosystems	Corporate & Academic	Monsanto Company	na	na	yes	United States	North America	yes	1a	Field	Table 2	no	na	potato	Cry3A	Coleoptera	NewLeaf	NewLeaf	non-transgenic potato	sampled throughout season	28.27	na	cited from EPA document	na	na	na	na	no	na	na	Arthropoda	Insecta	Coleoptera	Staphylinidae	not specified	not specified	Staphylinidae	predator	Chewing	na	natural population of variable ages	immature and adult	Chronic toxicology	Hermiston, OR
936	40	Duan et al. [b]	2004	Environmental Entomology 33(2): 275-281	Effects of transgenic Bacillus thuringiensis potato and conventional insecticides for Colorado potato beetle (Coleoptera: Chrysomelidae) management on the abundance of ground-dwelling arthropods in Oregon potato ecosystems	Corporate & Academic	Monsanto Company	na	na	yes	United States	North America	yes	1a	Field	Table 2	no	na	potato	Cry3A	Coleoptera	NewLeaf	NewLeaf	non-transgenic potato	sampled throughout season	28.27	na	cited from EPA document	na	na	na	na	no	na	na	Arthropoda	Insecta	Coleoptera	Anthicidae, Cetoniidae, Curculionidae, Lathridiidae & Scarabaeidae	not specified	not specified	Anthicidae, Cetoniidae, Curculionidae, Lathridiidae & Scarabaeidae	mixed	Chewing	na	natural population of variable ages	immature and adult	Chronic toxicology	Hermiston, OR
937	40	Duan et al. [b]	2004	Environmental Entomology 33(2): 275-281	Effects of transgenic Bacillus thuringiensis potato and conventional insecticides for Colorado potato beetle (Coleoptera: Chrysomelidae) management on the abundance of ground-dwelling arthropods in Oregon potato ecosystems	Corporate & Academic	Monsanto Company	na	na	yes	United States	North America	yes	1a	Field	Table 2	no	na	potato	Cry3A	Coleoptera	NewLeaf	NewLeaf	non-transgenic potato	sampled throughout season	28.27	na	cited from EPA document	na	na	na	na	no	na	na	Arthropoda	Insecta	Collembola	Entomobryidae & Hypogastruidae	not specified	not specified	Entomobryidae & Hypogastruidae	detritivore	Chewing	na	natural population of variable ages	immature and adult	Chronic toxicology	Hermiston, OR
938	40	Duan et al. [b]	2004	Environmental Entomology 33(2): 275-281	Effects of transgenic Bacillus thuringiensis potato and conventional insecticides for Colorado potato beetle (Coleoptera: Chrysomelidae) management on the abundance of ground-dwelling arthropods in Oregon potato ecosystems	Corporate & Academic	Monsanto Company	na	na	yes	United States	North America	yes	1a	Field	Table 2	no	na	potato	Cry3A	Coleoptera	NewLeaf	NewLeaf	non-transgenic potato	sampled throughout season	28.27	na	cited from EPA document	na	na	na	na	no	na	na	Arthropoda	Arachnida	Araneae	not specified	not specified	not specified	Araneae	predator	Piercing	na	natural population of variable ages	immature and adult	Chronic toxicology	Hermiston, OR
939	40	Duan et al. [b]	2004	Environmental Entomology 33(2): 275-281	Effects of transgenic Bacillus thuringiensis potato and conventional insecticides for Colorado potato beetle (Coleoptera: Chrysomelidae) management on the abundance of ground-dwelling arthropods in Oregon potato ecosystems	Corporate & Academic	Monsanto Company	na	na	yes	United States	North America	yes	1b	Field	Table 2	no	na	potato	Cry3A	Coleoptera	NewLeaf	NewLeaf	non-transgenic potato	sampled throughout season	28.27	na	cited from EPA document	na	na	na	na	no	na	na	Arthropoda	Insecta	Coleoptera	Carabidae	not specified	not specified	Carabidae	mixed	Chewing	EMUE	natural population of variable ages	immature and adult	Chronic toxicology	Hermiston, OR
940	40	Duan et al. [b]	2004	Environmental Entomology 33(2): 275-281	Effects of transgenic Bacillus thuringiensis potato and conventional insecticides for Colorado potato beetle (Coleoptera: Chrysomelidae) management on the abundance of ground-dwelling arthropods in Oregon potato ecosystems	Corporate & Academic	Monsanto Company	na	na	yes	United States	North America	yes	1b	Field	Table 2	no	na	potato	Cry3A	Coleoptera	NewLeaf	NewLeaf	non-transgenic potato	sampled throughout season	28.27	na	cited from EPA document	na	na	na	na	no	na	na	Arthropoda	Insecta	Coleoptera	Staphylinidae	not specified	not specified	Staphylinidae	predator	Chewing	EMUE	natural population of variable ages	immature and adult	Chronic toxicology	Hermiston, OR
941	40	Duan et al. [b]	2004	Environmental Entomology 33(2): 275-281	Effects of transgenic Bacillus thuringiensis potato and conventional insecticides for Colorado potato beetle (Coleoptera: Chrysomelidae) management on the abundance of ground-dwelling arthropods in Oregon potato ecosystems	Corporate & Academic	Monsanto Company	na	na	yes	United States	North America	yes	1b	Field	Table 2	no	na	potato	Cry3A	Coleoptera	NewLeaf	NewLeaf	non-transgenic potato	sampled throughout season	28.27	na	cited from EPA document	na	na	na	na	no	na	na	Arthropoda	Insecta	Coleoptera	Anthicidae, Cetoniidae, Curculionidae, Lathridiidae & Scarabaeidae	not specified	not specified	Anthicidae, Cetoniidae, Curculionidae, Lathridiidae & Scarabaeidae	mixed	Chewing	EMUE	natural population of variable ages	immature and adult	Chronic toxicology	Hermiston, OR
942	40	Duan et al. [b]	2004	Environmental Entomology 33(2): 275-281	Effects of transgenic Bacillus thuringiensis potato and conventional insecticides for Colorado potato beetle (Coleoptera: Chrysomelidae) management on the abundance of ground-dwelling arthropods in Oregon potato ecosystems	Corporate & Academic	Monsanto Company	na	na	yes	United States	North America	yes	1b	Field	Table 2	no	na	potato	Cry3A	Coleoptera	NewLeaf	NewLeaf	non-transgenic potato	sampled throughout season	28.27	na	cited from EPA document	na	na	na	na	no	na	na	Arthropoda	Insecta	Collembola	Entomobryidae & Hypogastruidae	not specified	not specified	Entomobryidae & Hypogastruidae	detritivore	Chewing	EMUE	natural population of variable ages	immature and adult	Chronic toxicology	Hermiston, OR
943	40	Duan et al. [b]	2004	Environmental Entomology 33(2): 275-281	Effects of transgenic Bacillus thuringiensis potato and conventional insecticides for Colorado potato beetle (Coleoptera: Chrysomelidae) management on the abundance of ground-dwelling arthropods in Oregon potato ecosystems	Corporate & Academic	Monsanto Company	na	na	yes	United States	North America	yes	1b	Field	Table 2	no	na	potato	Cry3A	Coleoptera	NewLeaf	NewLeaf	non-transgenic potato	sampled throughout season	28.27	na	cited from EPA document	na	na	na	na	no	na	na	Arthropoda	Arachnida	Araneae	not specified	not specified	not specified	Araneae	predator	Piercing	EMUE	natural population of variable ages	immature and adult	Chronic toxicology	Hermiston, OR
944	40	Duan et al. [b]	2004	Environmental Entomology 33(2): 275-281	Effects of transgenic Bacillus thuringiensis potato and conventional insecticides for Colorado potato beetle (Coleoptera: Chrysomelidae) management on the abundance of ground-dwelling arthropods in Oregon potato ecosystems	Corporate & Academic	Monsanto Company	na	na	yes	United States	North America	yes	1c	Field	Table 2	no	na	potato	Cry3A	Coleoptera	NewLeaf	NewLeaf	non-transgenic potato	sampled throughout season	28.27	na	cited from EPA document	na	na	na	na	no	na	na	Arthropoda	Insecta	Coleoptera	Carabidae	not specified	not specified	Carabidae	mixed	Chewing	EMUE	natural population of variable ages	immature and adult	Chronic toxicology	Hermiston, OR
945	40	Duan et al. [b]	2004	Environmental Entomology 33(2): 275-281	Effects of transgenic Bacillus thuringiensis potato and conventional insecticides for Colorado potato beetle (Coleoptera: Chrysomelidae) management on the abundance of ground-dwelling arthropods in Oregon potato ecosystems	Corporate & Academic	Monsanto Company	na	na	yes	United States	North America	yes	1c	Field	Table 2	no	na	potato	Cry3A	Coleoptera	NewLeaf	NewLeaf	non-transgenic potato	sampled throughout season	28.27	na	cited from EPA document	na	na	na	na	no	na	na	Arthropoda	Insecta	Coleoptera	Staphylinidae	not specified	not specified	Staphylinidae	predator	Chewing	EMUE	natural population of variable ages	immature and adult	Chronic toxicology	Hermiston, OR
946	40	Duan et al. [b]	2004	Environmental Entomology 33(2): 275-281	Effects of transgenic Bacillus thuringiensis potato and conventional insecticides for Colorado potato beetle (Coleoptera: Chrysomelidae) management on the abundance of ground-dwelling arthropods in Oregon potato ecosystems	Corporate & Academic	Monsanto Company	na	na	yes	United States	North America	yes	1c	Field	Table 2	no	na	potato	Cry3A	Coleoptera	NewLeaf	NewLeaf	non-transgenic potato	sampled throughout season	28.27	na	cited from EPA document	na	na	na	na	no	na	na	Arthropoda	Insecta	Coleoptera	Anthicidae, Cetoniidae, Curculionidae, Lathridiidae & Scarabaeidae	not specified	not specified	Anthicidae, Cetoniidae, Curculionidae, Lathridiidae & Scarabaeidae	mixed	Chewing	EMUE	natural population of variable ages	immature and adult	Chronic toxicology	Hermiston, OR
947	40	Duan et al. [b]	2004	Environmental Entomology 33(2): 275-281	Effects of transgenic Bacillus thuringiensis potato and conventional insecticides for Colorado potato beetle (Coleoptera: Chrysomelidae) management on the abundance of ground-dwelling arthropods in Oregon potato ecosystems	Corporate & Academic	Monsanto Company	na	na	yes	United States	North America	yes	1c	Field	Table 2	no	na	potato	Cry3A	Coleoptera	NewLeaf	NewLeaf	non-transgenic potato	sampled throughout season	28.27	na	cited from EPA document	na	na	na	na	no	na	na	Arthropoda	Insecta	Collembola	Entomobryidae & Hypogastruidae	not specified	not specified	Entomobryidae & Hypogastruidae	detritivore	Chewing	EMUE	natural population of variable ages	immature and adult	Chronic toxicology	Hermiston, OR
948	40	Duan et al. [b]	2004	Environmental Entomology 33(2): 275-281	Effects of transgenic Bacillus thuringiensis potato and conventional insecticides for Colorado potato beetle (Coleoptera: Chrysomelidae) management on the abundance of ground-dwelling arthropods in Oregon potato ecosystems	Corporate & Academic	Monsanto Company	na	na	yes	United States	North America	yes	1c	Field	Table 2	no	na	potato	Cry3A	Coleoptera	NewLeaf	NewLeaf	non-transgenic potato	sampled throughout season	28.27	na	cited from EPA document	na	na	na	na	no	na	na	Arthropoda	Arachnida	Araneae	not specified	not specified	not specified	Araneae	predator	Piercing	EMUE	natural population of variable ages	immature and adult	Chronic toxicology	Hermiston, OR
949	40	Duan et al. [b]	2004	Environmental Entomology 33(2): 275-281	Effects of transgenic Bacillus thuringiensis potato and conventional insecticides for Colorado potato beetle (Coleoptera: Chrysomelidae) management on the abundance of ground-dwelling arthropods in Oregon potato ecosystems	Corporate & Academic	Monsanto Company	na	na	yes	United States	North America	yes	2a	Field	Table 2	no	na	potato	Cry3A	Coleoptera	NewLeaf	NewLeaf	non-transgenic potato	sampled throughout season	28.27	na	cited from EPA document	na	na	na	na	no	na	na	Arthropoda	Insecta	Coleoptera	Carabidae	not specified	not specified	Carabidae	mixed	Chewing	na	natural population of variable ages	immature and adult	Chronic toxicology	Hermiston, OR
950	40	Duan et al. [b]	2004	Environmental Entomology 33(2): 275-281	Effects of transgenic Bacillus thuringiensis potato and conventional insecticides for Colorado potato beetle (Coleoptera: Chrysomelidae) management on the abundance of ground-dwelling arthropods in Oregon potato ecosystems	Corporate & Academic	Monsanto Company	na	na	yes	United States	North America	yes	2a	Field	Table 2	no	na	potato	Cry3A	Coleoptera	NewLeaf	NewLeaf	non-transgenic potato	sampled throughout season	28.27	na	cited from EPA document	na	na	na	na	no	na	na	Arthropoda	Insecta	Coleoptera	Staphylinidae	not specified	not specified	Staphylinidae	predator	Chewing	na	natural population of variable ages	immature and adult	Chronic toxicology	Hermiston, OR
951	40	Duan et al. [b]	2004	Environmental Entomology 33(2): 275-281	Effects of transgenic Bacillus thuringiensis potato and conventional insecticides for Colorado potato beetle (Coleoptera: Chrysomelidae) management on the abundance of ground-dwelling arthropods in Oregon potato ecosystems	Corporate & Academic	Monsanto Company	na	na	yes	United States	North America	yes	2a	Field	Table 2	no	na	potato	Cry3A	Coleoptera	NewLeaf	NewLeaf	non-transgenic potato	sampled throughout season	28.27	na	cited from EPA document	na	na	na	na	no	na	na	Arthropoda	Insecta	Coleoptera	Anthicidae, Cetoniidae, Curculionidae, Lathridiidae & Scarabaeidae	not specified	not specified	Anthicidae, Cetoniidae, Curculionidae, Lathridiidae & Scarabaeidae	mixed	Chewing	na	natural population of variable ages	immature and adult	Chronic toxicology	Hermiston, OR
952	40	Duan et al. [b]	2004	Environmental Entomology 33(2): 275-281	Effects of transgenic Bacillus thuringiensis potato and conventional insecticides for Colorado potato beetle (Coleoptera: Chrysomelidae) management on the abundance of ground-dwelling arthropods in Oregon potato ecosystems	Corporate & Academic	Monsanto Company	na	na	yes	United States	North America	yes	2a	Field	Table 2	no	na	potato	Cry3A	Coleoptera	NewLeaf	NewLeaf	non-transgenic potato	sampled throughout season	28.27	na	cited from EPA document	na	na	na	na	no	na	na	Arthropoda	Insecta	Collembola	Entomobryidae & Hypogastruidae	not specified	not specified	Entomobryidae & Hypogastruidae	detritivore	Chewing	na	natural population of variable ages	immature and adult	Chronic toxicology	Hermiston, OR
953	40	Duan et al. [b]	2004	Environmental Entomology 33(2): 275-281	Effects of transgenic Bacillus thuringiensis potato and conventional insecticides for Colorado potato beetle (Coleoptera: Chrysomelidae) management on the abundance of ground-dwelling arthropods in Oregon potato ecosystems	Corporate & Academic	Monsanto Company	na	na	yes	United States	North America	yes	2a	Field	Table 2	no	na	potato	Cry3A	Coleoptera	NewLeaf	NewLeaf	non-transgenic potato	sampled throughout season	28.27	na	cited from EPA document	na	na	na	na	no	na	na	Arthropoda	Arachnida	Araneae	not specified	not specified	not specified	Araneae	predator	Piercing	na	natural population of variable ages	immature and adult	Chronic toxicology	Hermiston, OR
954	40	Duan et al. [b]	2004	Environmental Entomology 33(2): 275-281	Effects of transgenic Bacillus thuringiensis potato and conventional insecticides for Colorado potato beetle (Coleoptera: Chrysomelidae) management on the abundance of ground-dwelling arthropods in Oregon potato ecosystems	Corporate & Academic	Monsanto Company	na	na	yes	United States	North America	yes	2b	Field	Table 2	no	na	potato	Cry3A	Coleoptera	NewLeaf	NewLeaf	non-transgenic potato	sampled throughout season	28.27	na	cited from EPA document	na	na	na	na	no	na	na	Arthropoda	Insecta	Coleoptera	Carabidae	not specified	not specified	Carabidae	mixed	Chewing	EMUE	natural population of variable ages	immature and adult	Chronic toxicology	Hermiston, OR
955	40	Duan et al. [b]	2004	Environmental Entomology 33(2): 275-281	Effects of transgenic Bacillus thuringiensis potato and conventional insecticides for Colorado potato beetle (Coleoptera: Chrysomelidae) management on the abundance of ground-dwelling arthropods in Oregon potato ecosystems	Corporate & Academic	Monsanto Company	na	na	yes	United States	North America	yes	2b	Field	Table 2	no	na	potato	Cry3A	Coleoptera	NewLeaf	NewLeaf	non-transgenic potato	sampled throughout season	28.27	na	cited from EPA document	na	na	na	na	no	na	na	Arthropoda	Insecta	Coleoptera	Staphylinidae	not specified	not specified	Staphylinidae	predator	Chewing	EMUE	natural population of variable ages	immature and adult	Chronic toxicology	Hermiston, OR
956	40	Duan et al. [b]	2004	Environmental Entomology 33(2): 275-281	Effects of transgenic Bacillus thuringiensis potato and conventional insecticides for Colorado potato beetle (Coleoptera: Chrysomelidae) management on the abundance of ground-dwelling arthropods in Oregon potato ecosystems	Corporate & Academic	Monsanto Company	na	na	yes	United States	North America	yes	2b	Field	Table 2	no	na	potato	Cry3A	Coleoptera	NewLeaf	NewLeaf	non-transgenic potato	sampled throughout season	28.27	na	cited from EPA document	na	na	na	na	no	na	na	Arthropoda	Insecta	Coleoptera	Anthicidae, Cetoniidae, Curculionidae, Lathridiidae & Scarabaeidae	not specified	not specified	Anthicidae, Cetoniidae, Curculionidae, Lathridiidae & Scarabaeidae	mixed	Chewing	EMUE	natural population of variable ages	immature and adult	Chronic toxicology	Hermiston, OR
957	40	Duan et al. [b]	2004	Environmental Entomology 33(2): 275-281	Effects of transgenic Bacillus thuringiensis potato and conventional insecticides for Colorado potato beetle (Coleoptera: Chrysomelidae) management on the abundance of ground-dwelling arthropods in Oregon potato ecosystems	Corporate & Academic	Monsanto Company	na	na	yes	United States	North America	yes	2b	Field	Table 2	no	na	potato	Cry3A	Coleoptera	NewLeaf	NewLeaf	non-transgenic potato	sampled throughout season	28.27	na	cited from EPA document	na	na	na	na	no	na	na	Arthropoda	Insecta	Collembola	Entomobryidae & Hypogastruidae	not specified	not specified	Entomobryidae & Hypogastruidae	detritivore	Chewing	EMUE	natural population of variable ages	immature and adult	Chronic toxicology	Hermiston, OR
958	40	Duan et al. [b]	2004	Environmental Entomology 33(2): 275-281	Effects of transgenic Bacillus thuringiensis potato and conventional insecticides for Colorado potato beetle (Coleoptera: Chrysomelidae) management on the abundance of ground-dwelling arthropods in Oregon potato ecosystems	Corporate & Academic	Monsanto Company	na	na	yes	United States	North America	yes	2b	Field	Table 2	no	na	potato	Cry3A	Coleoptera	NewLeaf	NewLeaf	non-transgenic potato	sampled throughout season	28.27	na	cited from EPA document	na	na	na	na	no	na	na	Arthropoda	Arachnida	Araneae	not specified	not specified	not specified	Araneae	predator	Piercing	EMUE	natural population of variable ages	immature and adult	Chronic toxicology	Hermiston, OR
959	40	Duan et al. [b]	2004	Environmental Entomology 33(2): 275-281	Effects of transgenic Bacillus thuringiensis potato and conventional insecticides for Colorado potato beetle (Coleoptera: Chrysomelidae) management on the abundance of ground-dwelling arthropods in Oregon potato ecosystems	Corporate & Academic	Monsanto Company	na	na	yes	United States	North America	yes	2c	Field	Table 2	no	na	potato	Cry3A	Coleoptera	NewLeaf	NewLeaf	non-transgenic potato	sampled throughout season	28.27	na	cited from EPA document	na	na	na	na	no	na	na	Arthropoda	Insecta	Coleoptera	Carabidae	not specified	not specified	Carabidae	mixed	Chewing	EMUE	natural population of variable ages	immature and adult	Chronic toxicology	Hermiston, OR
960	40	Duan et al. [b]	2004	Environmental Entomology 33(2): 275-281	Effects of transgenic Bacillus thuringiensis potato and conventional insecticides for Colorado potato beetle (Coleoptera: Chrysomelidae) management on the abundance of ground-dwelling arthropods in Oregon potato ecosystems	Corporate & Academic	Monsanto Company	na	na	yes	United States	North America	yes	2c	Field	Table 2	no	na	potato	Cry3A	Coleoptera	NewLeaf	NewLeaf	non-transgenic potato	sampled throughout season	28.27	na	cited from EPA document	na	na	na	na	no	na	na	Arthropoda	Insecta	Coleoptera	Staphylinidae	not specified	not specified	Staphylinidae	predator	Chewing	EMUE	natural population of variable ages	immature and adult	Chronic toxicology	Hermiston, OR
961	40	Duan et al. [b]	2004	Environmental Entomology 33(2): 275-281	Effects of transgenic Bacillus thuringiensis potato and conventional insecticides for Colorado potato beetle (Coleoptera: Chrysomelidae) management on the abundance of ground-dwelling arthropods in Oregon potato ecosystems	Corporate & Academic	Monsanto Company	na	na	yes	United States	North America	yes	2c	Field	Table 2	no	na	potato	Cry3A	Coleoptera	NewLeaf	NewLeaf	non-transgenic potato	sampled throughout season	28.27	na	cited from EPA document	na	na	na	na	no	na	na	Arthropoda	Insecta	Coleoptera	Anthicidae, Cetoniidae, Curculionidae, Lathridiidae & Scarabaeidae	not specified	not specified	Anthicidae, Cetoniidae, Curculionidae, Lathridiidae & Scarabaeidae	mixed	Chewing	EMUE	natural population of variable ages	immature and adult	Chronic toxicology	Hermiston, OR
962	40	Duan et al. [b]	2004	Environmental Entomology 33(2): 275-281	Effects of transgenic Bacillus thuringiensis potato and conventional insecticides for Colorado potato beetle (Coleoptera: Chrysomelidae) management on the abundance of ground-dwelling arthropods in Oregon potato ecosystems	Corporate & Academic	Monsanto Company	na	na	yes	United States	North America	yes	2c	Field	Table 2	no	na	potato	Cry3A	Coleoptera	NewLeaf	NewLeaf	non-transgenic potato	sampled throughout season	28.27	na	cited from EPA document	na	na	na	na	no	na	na	Arthropoda	Insecta	Collembola	Entomobryidae & Hypogastruidae	not specified	not specified	Entomobryidae & Hypogastruidae	detritivore	Chewing	EMUE	natural population of variable ages	immature and adult	Chronic toxicology	Hermiston, OR
963	40	Duan et al. [b]	2004	Environmental Entomology 33(2): 275-281	Effects of transgenic Bacillus thuringiensis potato and conventional insecticides for Colorado potato beetle (Coleoptera: Chrysomelidae) management on the abundance of ground-dwelling arthropods in Oregon potato ecosystems	Corporate & Academic	Monsanto Company	na	na	yes	United States	North America	yes	2c	Field	Table 2	no	na	potato	Cry3A	Coleoptera	NewLeaf	NewLeaf	non-transgenic potato	sampled throughout season	28.27	na	cited from EPA document	na	na	na	na	no	na	na	Arthropoda	Arachnida	Araneae	not specified	not specified	not specified	Araneae	predator	Piercing	EMUE	natural population of variable ages	immature and adult	Chronic toxicology	Hermiston, OR
1009	43	Sisterson et al.	2004	Environmental Entomology 33(4): 921-929	Arthropod abundance and diversity in Bt and non-Bt cotton fields	Academic	Department of Entomology, University of Arizona	na	na	yes	United States	North America	yes	1	Field	Table 3 (data from author)	no	na	cotton	Cry1Ac	Lepidoptera	MON531	NuCOTN 33B, Deltapine 655BR	Deltapine 5415, Deltapine 5690RR	not specified	not specified	na	na	na	na	na	na	no	na	na	Arthropoda	Insecta	Thysanoptera	Thripidae	not specified	not specified	Thripidae	herbivore	Rasping	TGLE	natural population of variable ages	nymph & adult	Chronic toxicology	Pima and Graham County, Arizona
1010	43	Sisterson et al.	2004	Environmental Entomology 33(4): 921-929	Arthropod abundance and diversity in Bt and non-Bt cotton fields	Academic	Department of Entomology, University of Arizona	na	na	yes	United States	North America	yes	1	Field	Table 3 (data from author)	no	na	cotton	Cry1Ac	Lepidoptera	MON531	NuCOTN 33B, Deltapine 655BR	Deltapine 5415, Deltapine 5690RR	not specified	not specified	na	na	na	na	na	na	no	na	na	Arthropoda	Insecta	Coleoptera	Nitidulidae	not specified	not specified	Nitidulidae	mixed	Chewing	TGLE	natural population of variable ages	nymph & adult	Chronic toxicology	Pima and Graham County, Arizona
1011	43	Sisterson et al.	2004	Environmental Entomology 33(4): 921-929	Arthropod abundance and diversity in Bt and non-Bt cotton fields	Academic	Department of Entomology, University of Arizona	na	na	yes	United States	North America	yes	1	Field	Table 3 (data from author)	no	na	cotton	Cry1Ac	Lepidoptera	MON531	NuCOTN 33B, Deltapine 655BR	Deltapine 5415, Deltapine 5690RR	not specified	not specified	na	na	na	na	na	na	no	na	na	Arthropoda	Insecta	Hemiptera	Aleyrodidae	not specified	not specified	Aleyrodidae	herbivore	Piercing	TGLE	natural population of variable ages	adult	Chronic toxicology	Pima and Graham County, Arizona
1012	43	Sisterson et al.	2004	Environmental Entomology 33(4): 921-929	Arthropod abundance and diversity in Bt and non-Bt cotton fields	Academic	Department of Entomology, University of Arizona	na	na	yes	United States	North America	yes	1	Field	Table 3 (data from author)	no	na	cotton	Cry1Ac	Lepidoptera	MON531	NuCOTN 33B, Deltapine 655BR	Deltapine 5415, Deltapine 5690RR	not specified	not specified	na	na	na	na	na	na	no	na	na	Arthropoda	Insecta	Neuroptera	Chrysopidae	not specified	not specified	Chrysopidae	predator	unknown	TGLE	natural population of variable ages	nymph & adult	Chronic toxicology	Pima and Graham County, Arizona
1013	43	Sisterson et al.	2004	Environmental Entomology 33(4): 921-929	Arthropod abundance and diversity in Bt and non-Bt cotton fields	Academic	Department of Entomology, University of Arizona	na	na	yes	United States	North America	yes	1	Field	Table 3 (data from author)	no	na	cotton	Cry1Ac	Lepidoptera	MON531	NuCOTN 33B, Deltapine 655BR	Deltapine 5415, Deltapine 5690RR	not specified	not specified	na	na	na	na	na	na	no	na	na	Arthropoda	Insecta	Coleoptera	Lathridiidae	not specified	not specified	Lathridiidae	detritivore	Chewing	TGLE	natural population of variable ages	nymph & adult	Chronic toxicology	Pima and Graham County, Arizona
1014	43	Sisterson et al.	2004	Environmental Entomology 33(4): 921-929	Arthropod abundance and diversity in Bt and non-Bt cotton fields	Academic	Department of Entomology, University of Arizona	na	na	yes	United States	North America	yes	1	Field	Table 3 (data from author)	no	na	cotton	Cry1Ac	Lepidoptera	MON531	NuCOTN 33B, Deltapine 655BR	Deltapine 5415, Deltapine 5690RR	not specified	not specified	na	na	na	na	na	na	no	na	na	Arthropoda	Insecta	Hemiptera	Miridae	not specified	not specified	Miridae	herbivore	Piercing	TGLE	natural population of variable ages	nymph & adult	Chronic toxicology	Pima and Graham County, Arizona
1015	43	Sisterson et al.	2004	Environmental Entomology 33(4): 921-929	Arthropod abundance and diversity in Bt and non-Bt cotton fields	Academic	Department of Entomology, University of Arizona	na	na	yes	United States	North America	yes	1	Field	Table 3 (data from author)	no	na	cotton	Cry1Ac	Lepidoptera	MON531	NuCOTN 33B, Deltapine 655BR	Deltapine 5415, Deltapine 5690RR	not specified	not specified	na	na	na	na	na	na	no	na	na	Arthropoda	Insecta	Coleoptera	Anthicidae	not specified	not specified	Anthicidae	mixed	Chewing	TGLE	natural population of variable ages	nymph & adult	Chronic toxicology	Pima and Graham County, Arizona
1016	43	Sisterson et al.	2004	Environmental Entomology 33(4): 921-929	Arthropod abundance and diversity in Bt and non-Bt cotton fields	Academic	Department of Entomology, University of Arizona	na	na	yes	United States	North America	yes	1	Field	Table 3 (data from author)	no	na	cotton	Cry1Ac	Lepidoptera	MON531	NuCOTN 33B, Deltapine 655BR	Deltapine 5415, Deltapine 5690RR	not specified	not specified	na	na	na	na	na	na	no	na	na	Arthropoda	Insecta	Psocoptera	not specified	not specified	not specified	Psocoptera	detritivore	Piercing	TGLE	natural population of variable ages	nymph & adult	Chronic toxicology	Pima and Graham County, Arizona
1017	43	Sisterson et al.	2004	Environmental Entomology 33(4): 921-929	Arthropod abundance and diversity in Bt and non-Bt cotton fields	Academic	Department of Entomology, University of Arizona	na	na	yes	United States	North America	yes	1	Field	Table 3 (data from author)	no	na	cotton	Cry1Ac	Lepidoptera	MON531	NuCOTN 33B, Deltapine 655BR	Deltapine 5415, Deltapine 5690RR	not specified	not specified	na	na	na	na	na	na	no	na	na	Arthropoda	Insecta	Diptera	Empididae	not specified	not specified	Empididae	predator	Piercing	TGLE	natural population of variable ages	nymph & adult	Chronic toxicology	Pima and Graham County, Arizona
1018	43	Sisterson et al.	2004	Environmental Entomology 33(4): 921-929	Arthropod abundance and diversity in Bt and non-Bt cotton fields	Academic	Department of Entomology, University of Arizona	na	na	yes	United States	North America	yes	1	Field	Table 3 (data from author)	no	na	cotton	Cry1Ac	Lepidoptera	MON531	NuCOTN 33B, Deltapine 655BR	Deltapine 5415, Deltapine 5690RR	not specified	not specified	na	na	na	na	na	na	no	na	na	Arthropoda	Arachnida	Araneae	Clubionidae	not specified	not specified	Clubionidae	predator	Piercing	TGLE	natural population of variable ages	nymph & adult	Chronic toxicology	Pima and Graham County, Arizona
1148	53	Wu et al.	2002	Crop Protection 21: 997-1002	Seasonal abundance of the mirids, Lygus lucorum and Adelphocoris spp. (Hemiptera: Miridae) on Bt cotton in northern China	Government	Institute of Plant Protection, China Academy of Agricultural Sciences	na	na	yes	China	Asia	no	1	Field	Figure 1	yes	no	cotton	Cry1A	Lepidoptera	not specified	GK12	Shimian3	sampled throughout season	not specified	na	na	na	na	na	na	no	na	na	Arthropoda	Insecta	Hemiptera	Miridae	not specified	not specified	Miridae	herbivore	Piercing	na	natural population of variable ages	adult and nymph	Chronic toxicology	Hebei Province of northern China
1150	53	Wu et al.	2002	Crop Protection 21: 997-1002	Seasonal abundance of the mirids, Lygus lucorum and Adelphocoris spp. (Hemiptera: Miridae) on Bt cotton in northern China	Government	Institute of Plant Protection, China Academy of Agricultural Sciences	na	na	yes	China	Asia	no	2	Field	Figure 2	yes	no	cotton	Cry1A	Lepidoptera	not specified	GK12	Shimian3	sampled throughout season	not specified	na	na	na	na	na	na	no	na	na	Arthropoda	Insecta	Hemiptera	Miridae	not specified	not specified	Miridae	herbivore	Piercing	na	natural population of variable ages	adult and nymph	Chronic toxicology	Hebei Province of northern China
1152	53	Wu et al.	2002	Crop Protection 21: 997-1002	Seasonal abundance of the mirids, Lygus lucorum and Adelphocoris spp. (Hemiptera: Miridae) on Bt cotton in northern China	Government	Institute of Plant Protection, China Academy of Agricultural Sciences	na	na	yes	China	Asia	no	3	Field	Figure 3	yes	no	cotton	Cry1A	Lepidoptera	not specified	GK12	Shimian3	sampled throughout season	not specified	na	na	na	na	na	na	no	na	na	Arthropoda	Insecta	Hemiptera	Miridae	not specified	not specified	Miridae	herbivore	Piercing	na	natural population of variable ages	adult and nymph	Chronic toxicology	Hebei Province of northern China
1154	53	Wu et al.	2002	Crop Protection 21: 997-1002	Seasonal abundance of the mirids, Lygus lucorum and Adelphocoris spp. (Hemiptera: Miridae) on Bt cotton in northern China	Government	Institute of Plant Protection, China Academy of Agricultural Sciences	na	na	yes	China	Asia	no	4	Field	Figure 4	yes	no	cotton	Cry1A & CpT1 (cowpea trypisin inhibitor gene)	Lepidoptera	not specified	SGK321	Shiyuan321	sampled throughout season	not specified	na	na	na	na	na	na	no	na	na	Arthropoda	Insecta	Hemiptera	Miridae	not specified	not specified	Miridae	herbivore	Piercing	na	natural population of variable ages	adult and nymph	Chronic toxicology	Hebei Province of northern China
1421	75	Wold et al.	2001	Journal of Entomological Science 36(2): 177-187	In-field monitoring of beneficial insect populations in transgenic corn expressing a Bacillus thuringiensis toxin	Academic & Government	Department of Entomology, University of Minnesota	na	na	yes	United States	North America	yes	1	Field	Table 1 (data from author)	no	na	maize	Cry1Ab	Lepidoptera	Bt11	GH-0937	Bonus	not specified	not specified	na	na	na	na	na	na	no	na	na	Arthropoda	Insecta	Coleoptera	Coccinellidae	Coleomegilla	Coleomegilla maculata	Coleomegilla maculata	predator	Chewing	na	natural population of variable ages	adult	Chronic toxicology	Rosemount, MN
1422	75	Wold et al.	2001	Journal of Entomological Science 36(2): 177-187	In-field monitoring of beneficial insect populations in transgenic corn expressing a Bacillus thuringiensis toxin	Academic & Government	Department of Entomology, University of Minnesota	na	na	yes	United States	North America	yes	1	Field	Table 1 (data from author)	no	na	maize	Cry1Ab	Lepidoptera	Bt11	GH-0937	Bonus	not specified	not specified	na	na	na	na	na	na	no	na	na	Arthropoda	Insecta	Coleoptera	Coccinellidae	Coleomegilla	Coleomegilla maculata	Coleomegilla maculata	predator	Chewing	na	natural population of variable ages	larva	Chronic toxicology	Rosemount, MN
1423	75	Wold et al.	2001	Journal of Entomological Science 36(2): 177-187	In-field monitoring of beneficial insect populations in transgenic corn expressing a Bacillus thuringiensis toxin	Academic & Government	Department of Entomology, University of Minnesota	na	na	yes	United States	North America	yes	1	Field	Table 1 (data from author)	no	na	maize	Cry1Ab	Lepidoptera	Bt11	GH-0937	Bonus	not specified	not specified	na	na	na	na	na	na	no	na	na	Arthropoda	Insecta	Coleoptera	Coccinellidae	Hippodamia	Hippodamia tredecimpunctata	Hippodamia tredecimpunctata	predator	Chewing	na	natural population of variable ages	adult	Chronic toxicology	Rosemount, MN
1424	75	Wold et al.	2001	Journal of Entomological Science 36(2): 177-187	In-field monitoring of beneficial insect populations in transgenic corn expressing a Bacillus thuringiensis toxin	Academic & Government	Department of Entomology, University of Minnesota	na	na	yes	United States	North America	yes	1	Field	Table 1 (data from author)	no	na	maize	Cry1Ab	Lepidoptera	Bt11	GH-0937	Bonus	not specified	not specified	na	na	na	na	na	na	no	na	na	Arthropoda	Insecta	Coleoptera	Coccinellidae	Hippodamia	Hippodamia tredecimpunctata	Hippodamia tredecimpunctata	predator	Chewing	na	natural population of variable ages	larva	Chronic toxicology	Rosemount, MN
1425	75	Wold et al.	2001	Journal of Entomological Science 36(2): 177-187	In-field monitoring of beneficial insect populations in transgenic corn expressing a Bacillus thuringiensis toxin	Academic & Government	Department of Entomology, University of Minnesota	na	na	yes	United States	North America	yes	1	Field	Table 1 (data from author)	no	na	maize	Cry1Ab	Lepidoptera	Bt11	GH-0937	Bonus	not specified	not specified	na	na	na	na	na	na	no	na	na	Arthropoda	Insecta	Coleoptera	Coccinellidae	Adalia	Adalia bipunctata	Adalia bipunctata	predator	Chewing	na	natural population of variable ages	adult	Chronic toxicology	Rosemount, MN
1426	75	Wold et al.	2001	Journal of Entomological Science 36(2): 177-187	In-field monitoring of beneficial insect populations in transgenic corn expressing a Bacillus thuringiensis toxin	Academic & Government	Department of Entomology, University of Minnesota	na	na	yes	United States	North America	yes	1	Field	Table 1 (data from author)	no	na	maize	Cry1Ab	Lepidoptera	Bt11	GH-0937	Bonus	not specified	not specified	na	na	na	na	na	na	no	na	na	Arthropoda	Insecta	Coleoptera	Coccinellidae	Adalia	Adalia bipunctata	Adalia bipunctata	predator	Chewing	na	natural population of variable ages	larva	Chronic toxicology	Rosemount, MN
1427	75	Wold et al.	2001	Journal of Entomological Science 36(2): 177-187	In-field monitoring of beneficial insect populations in transgenic corn expressing a Bacillus thuringiensis toxin	Academic & Government	Department of Entomology, University of Minnesota	na	na	yes	United States	North America	yes	1	Field	Table 1 (data from author)	no	na	maize	Cry1Ab	Lepidoptera	Bt11	GH-0937	Bonus	not specified	not specified	na	na	na	na	na	na	no	na	na	Arthropoda	Insecta	Coleoptera	Coccinellidae	Harmonia	Harmonia axyridis	Harmonia axyridis	predator	Chewing	na	natural population of variable ages	adult	Chronic toxicology	Rosemount, MN
1428	75	Wold et al.	2001	Journal of Entomological Science 36(2): 177-187	In-field monitoring of beneficial insect populations in transgenic corn expressing a Bacillus thuringiensis toxin	Academic & Government	Department of Entomology, University of Minnesota	na	na	yes	United States	North America	yes	1	Field	Table 1 (data from author)	no	na	maize	Cry1Ab	Lepidoptera	Bt11	GH-0937	Bonus	not specified	not specified	na	na	na	na	na	na	no	na	na	Arthropoda	Insecta	Coleoptera	Coccinellidae	Harmonia	Harmonia axyridis	Harmonia axyridis	predator	Chewing	na	natural population of variable ages	larva	Chronic toxicology	Rosemount, MN
1429	75	Wold et al.	2001	Journal of Entomological Science 36(2): 177-187	In-field monitoring of beneficial insect populations in transgenic corn expressing a Bacillus thuringiensis toxin	Academic & Government	Department of Entomology, University of Minnesota	na	na	yes	United States	North America	yes	1	Field	Table 1 (data from author)	no	na	maize	Cry1Ab	Lepidoptera	Bt11	GH-0937	Bonus	not specified	not specified	na	na	na	na	na	na	no	na	na	Arthropoda	Insecta	Coleoptera	Coccinellidae	not specified	not specified	Coccinellidae	predator	Chewing	na	natural population of variable ages	egg	Chronic toxicology	Rosemount, MN
1430	75	Wold et al.	2001	Journal of Entomological Science 36(2): 177-187	In-field monitoring of beneficial insect populations in transgenic corn expressing a Bacillus thuringiensis toxin	Academic & Government	Department of Entomology, University of Minnesota	na	na	yes	United States	North America	yes	1	Field	Table 1 (data from author)	no	na	maize	Cry1Ab	Lepidoptera	Bt11	GH-0937	Bonus	not specified	not specified	na	na	na	na	na	na	no	na	na	Arthropoda	Insecta	Hemiptera	Anthocoridae	Orius	not specified	Orius	predator	Piercing	na	natural population of variable ages	adult	Chronic toxicology	Rosemount, MN
1431	75	Wold et al.	2001	Journal of Entomological Science 36(2): 177-187	In-field monitoring of beneficial insect populations in transgenic corn expressing a Bacillus thuringiensis toxin	Academic & Government	Department of Entomology, University of Minnesota	na	na	yes	United States	North America	yes	1	Field	Table 1 (data from author)	no	na	maize	Cry1Ab	Lepidoptera	Bt11	GH-0937	Bonus	not specified	not specified	na	na	na	na	na	na	no	na	na	Arthropoda	Insecta	Hemiptera	Anthocoridae	Orius	not specified	Orius	predator	Piercing	na	natural population of variable ages	nymph	Chronic toxicology	Rosemount, MN
1432	75	Wold et al.	2001	Journal of Entomological Science 36(2): 177-187	In-field monitoring of beneficial insect populations in transgenic corn expressing a Bacillus thuringiensis toxin	Academic & Government	Department of Entomology, University of Minnesota	na	na	yes	United States	North America	yes	1	Field	Table 1 (data from author)	no	na	maize	Cry1Ab	Lepidoptera	Bt11	GH-0937	Bonus	not specified	not specified	na	na	na	na	na	na	no	na	na	Arthropoda	Insecta	Neuroptera	Chrysopidae	Chrysoperla	Chrysoperla carnea	Chrysoperla carnea	predator	Chewing	na	natural population of variable ages	adult	Chronic toxicology	Rosemount, MN
1433	75	Wold et al.	2001	Journal of Entomological Science 36(2): 177-187	In-field monitoring of beneficial insect populations in transgenic corn expressing a Bacillus thuringiensis toxin	Academic & Government	Department of Entomology, University of Minnesota	na	na	yes	United States	North America	yes	1	Field	Table 1 (data from author)	no	na	maize	Cry1Ab	Lepidoptera	Bt11	GH-0937	Bonus	not specified	not specified	na	na	na	na	na	na	no	na	na	Arthropoda	Insecta	Neuroptera	Chrysopidae	Chrysoperla	Chrysoperla carnea	Chrysoperla carnea	predator	Piercing	na	natural population of variable ages	larva	Chronic toxicology	Rosemount, MN
1434	75	Wold et al.	2001	Journal of Entomological Science 36(2): 177-187	In-field monitoring of beneficial insect populations in transgenic corn expressing a Bacillus thuringiensis toxin	Academic & Government	Department of Entomology, University of Minnesota	na	na	yes	United States	North America	yes	1	Field	Table 1 (data from author)	no	na	maize	Cry1Ab	Lepidoptera	Bt11	GH-0937	Bonus	not specified	not specified	na	na	na	na	na	na	no	na	na	Arthropoda	Insecta	Neuroptera	Chrysopidae	Chrysoperla	Chrysoperla carnea	Chrysoperla carnea	predator	Unknown	na	natural population of variable ages	egg	Chronic toxicology	Rosemount, MN
1435	75	Wold et al.	2001	Journal of Entomological Science 36(2): 177-187	In-field monitoring of beneficial insect populations in transgenic corn expressing a Bacillus thuringiensis toxin	Academic & Government	Department of Entomology, University of Minnesota	na	na	yes	United States	North America	yes	1	Field	Table 1 (data from author)	no	na	maize	Cry1Ab	Lepidoptera	Bt11	GH-0937	Bonus	not specified	not specified	na	na	na	na	na	na	no	na	na	Arthropoda	Insecta	Coleoptera	Coccinellidae	not specified	not specified	Coccinellidae	predator	Chewing	na	natural population of variable ages	pupae	Chronic toxicology	Rosemount, MN
1443	75	Wold et al.	2001	Journal of Entomological Science 36(2): 177-187	In-field monitoring of beneficial insect populations in transgenic corn expressing a Bacillus thuringiensis toxin	Academic & Government	Department of Entomology, University of Minnesota	na	na	yes	United States	North America	yes	2	Field	Table 1 (data from author)	no	na	maize	Cry1Ab	Lepidoptera	Bt11	GH-0937	Bonus	not specified	not specified	na	na	na	na	na	na	no	na	na	Arthropoda	Insecta	Coleoptera	Coccinellidae	Coleomegilla	Coleomegilla maculata	Coleomegilla maculata	predator	Chewing	na	natural population of variable ages	adult	Chronic toxicology	Rosemount, MN
1444	75	Wold et al.	2001	Journal of Entomological Science 36(2): 177-187	In-field monitoring of beneficial insect populations in transgenic corn expressing a Bacillus thuringiensis toxin	Academic & Government	Department of Entomology, University of Minnesota	na	na	yes	United States	North America	yes	2	Field	Table 1 (data from author)	no	na	maize	Cry1Ab	Lepidoptera	Bt11	GH-0937	Bonus	not specified	not specified	na	na	na	na	na	na	no	na	na	Arthropoda	Insecta	Coleoptera	Coccinellidae	Coleomegilla	Coleomegilla maculata	Coleomegilla maculata	predator	Chewing	na	natural population of variable ages	larva	Chronic toxicology	Rosemount, MN
1445	75	Wold et al.	2001	Journal of Entomological Science 36(2): 177-187	In-field monitoring of beneficial insect populations in transgenic corn expressing a Bacillus thuringiensis toxin	Academic & Government	Department of Entomology, University of Minnesota	na	na	yes	United States	North America	yes	2	Field	Table 1 (data from author)	no	na	maize	Cry1Ab	Lepidoptera	Bt11	GH-0937	Bonus	not specified	not specified	na	na	na	na	na	na	no	na	na	Arthropoda	Insecta	Hemiptera	Anthocoridae	Orius	not specified	Orius	predator	Piercing	na	natural population of variable ages	adult	Chronic toxicology	Rosemount, MN
1446	75	Wold et al.	2001	Journal of Entomological Science 36(2): 177-187	In-field monitoring of beneficial insect populations in transgenic corn expressing a Bacillus thuringiensis toxin	Academic & Government	Department of Entomology, University of Minnesota	na	na	yes	United States	North America	yes	2	Field	Table 1 (data from author)	no	na	maize	Cry1Ab	Lepidoptera	Bt11	GH-0937	Bonus	not specified	not specified	na	na	na	na	na	na	no	na	na	Arthropoda	Insecta	Hemiptera	Anthocoridae	Orius	not specified	Orius	predator	Piercing	na	natural population of variable ages	nymph	Chronic toxicology	Rosemount, MN
1447	75	Wold et al.	2001	Journal of Entomological Science 36(2): 177-187	In-field monitoring of beneficial insect populations in transgenic corn expressing a Bacillus thuringiensis toxin	Academic & Government	Department of Entomology, University of Minnesota	na	na	yes	United States	North America	yes	2	Field	Table 1 (data from author)	no	na	maize	Cry1Ab	Lepidoptera	Bt11	GH-0937	Bonus	not specified	not specified	na	na	na	na	na	na	no	na	na	Arthropoda	Insecta	Neuroptera	Chrysopidae	Chrysoperla	Chrysoperla carnea	Chrysoperla carnea	predator	Piercing	na	natural population of variable ages	larva	Chronic toxicology	Rosemount, MN
1448	75	Wold et al.	2001	Journal of Entomological Science 36(2): 177-187	In-field monitoring of beneficial insect populations in transgenic corn expressing a Bacillus thuringiensis toxin	Academic & Government	Department of Entomology, University of Minnesota	na	na	yes	United States	North America	yes	2	Field	Table 1 (data from author)	no	na	maize	Cry1Ab	Lepidoptera	Bt11	GH-0937	Bonus	not specified	not specified	na	na	na	na	na	na	no	na	na	Arthropoda	Insecta	Neuroptera	Chrysopidae	Chrysoperla	Chrysoperla carnea	Chrysoperla carnea	predator	Unknown	na	natural population of variable ages	egg	Chronic toxicology	Rosemount, MN
1449	75	Wold et al.	2001	Journal of Entomological Science 36(2): 177-187	In-field monitoring of beneficial insect populations in transgenic corn expressing a Bacillus thuringiensis toxin	Academic & Government	Department of Entomology, University of Minnesota	na	na	yes	United States	North America	yes	2	Field	Table 1 (data from author)	no	na	maize	Cry1Ab	Lepidoptera	Bt11	GH-0937	Bonus	not specified	not specified	na	na	na	na	na	na	no	na	na	Arthropoda	Insecta	Coleoptera	Coccinellidae	not specified	not specified	Coccinellidae	predator	Chewing	na	natural population of variable ages	pupae	Chronic toxicology	Rosemount, MN
1466	75	Wold et al.	2001	Journal of Entomological Science 36(2): 177-187	In-field monitoring of beneficial insect populations in transgenic corn expressing a Bacillus thuringiensis toxin	Academic & Government	Department of Entomology, University of Minnesota	na	na	yes	United States	North America	yes	3a	Semi-field	Table 2 (data from author)	no	na	maize	Cry1Ab	Lepidoptera	Bt11	GH-0937	Bonus	from tassel to brown silk	not specified	na	na	na	na	na	na	no	na	na	Arthropoda	Insecta	Coleoptera	Coccinellidae	Coleomegilla	Coleomegilla maculata	Coleomegilla maculata	predator	Chewing	na	natural population of variable ages	adult	Chronic toxicology	Rosemount, MN
1467	75	Wold et al.	2001	Journal of Entomological Science 36(2): 177-187	In-field monitoring of beneficial insect populations in transgenic corn expressing a Bacillus thuringiensis toxin	Academic & Government	Department of Entomology, University of Minnesota	na	na	yes	United States	North America	yes	3a	Semi-field	Table 2 (data from author)	no	na	maize	Cry1Ab	Lepidoptera	Bt11	GH-0937	Bonus	from tassel to brown silk	not specified	na	na	na	na	na	na	no	na	na	Arthropoda	Insecta	Coleoptera	Coccinellidae	Coleomegilla	Coleomegilla maculata	Coleomegilla maculata	predator	Chewing	na	natural population of variable ages	larva	Chronic toxicology	Rosemount, MN
1468	75	Wold et al.	2001	Journal of Entomological Science 36(2): 177-187	In-field monitoring of beneficial insect populations in transgenic corn expressing a Bacillus thuringiensis toxin	Academic & Government	Department of Entomology, University of Minnesota	na	na	yes	United States	North America	yes	3a	Semi-field	Table 2 (data from author)	no	na	maize	Cry1Ab	Lepidoptera	Bt11	GH-0937	Bonus	from tassel to brown silk	not specified	na	na	na	na	na	na	no	na	na	Arthropoda	Insecta	Coleoptera	Coccinellidae	Hippodamia	Hippodamia convergens	Hippodamia convergens	predator	Chewing	na	natural population of variable ages	larva	Chronic toxicology	Rosemount, MN
1469	75	Wold et al.	2001	Journal of Entomological Science 36(2): 177-187	In-field monitoring of beneficial insect populations in transgenic corn expressing a Bacillus thuringiensis toxin	Academic & Government	Department of Entomology, University of Minnesota	na	na	yes	United States	North America	yes	3a	Semi-field	Table 2 (data from author)	no	na	maize	Cry1Ab	Lepidoptera	Bt11	GH-0937	Bonus	from tassel to brown silk	not specified	na	na	na	na	na	na	no	na	na	Arthropoda	Insecta	Coleoptera	Coccinellidae	Hippodamia	Hippodamia tredecimpunctata	Hippodamia tredecimpunctata	predator	Chewing	na	natural population of variable ages	adult	Chronic toxicology	Rosemount, MN
1470	75	Wold et al.	2001	Journal of Entomological Science 36(2): 177-187	In-field monitoring of beneficial insect populations in transgenic corn expressing a Bacillus thuringiensis toxin	Academic & Government	Department of Entomology, University of Minnesota	na	na	yes	United States	North America	yes	3a	Semi-field	Table 2 (data from author)	no	na	maize	Cry1Ab	Lepidoptera	Bt11	GH-0937	Bonus	from tassel to brown silk	not specified	na	na	na	na	na	na	no	na	na	Arthropoda	Insecta	Coleoptera	Coccinellidae	Hippodamia	Hippodamia tredecimpunctata	Hippodamia tredecimpunctata	predator	Chewing	na	natural population of variable ages	larva	Chronic toxicology	Rosemount, MN
1471	75	Wold et al.	2001	Journal of Entomological Science 36(2): 177-187	In-field monitoring of beneficial insect populations in transgenic corn expressing a Bacillus thuringiensis toxin	Academic & Government	Department of Entomology, University of Minnesota	na	na	yes	United States	North America	yes	3a	Semi-field	Table 2 (data from author)	no	na	maize	Cry1Ab	Lepidoptera	Bt11	GH-0937	Bonus	from tassel to brown silk	not specified	na	na	na	na	na	na	no	na	na	Arthropoda	Insecta	Coleoptera	Coccinellidae	Harmonia	Harmonia axyridis	Harmonia axyridis	predator	Chewing	na	natural population of variable ages	adult	Chronic toxicology	Rosemount, MN
1472	75	Wold et al.	2001	Journal of Entomological Science 36(2): 177-187	In-field monitoring of beneficial insect populations in transgenic corn expressing a Bacillus thuringiensis toxin	Academic & Government	Department of Entomology, University of Minnesota	na	na	yes	United States	North America	yes	3a	Semi-field	Table 2 (data from author)	no	na	maize	Cry1Ab	Lepidoptera	Bt11	GH-0937	Bonus	from tassel to brown silk	not specified	na	na	na	na	na	na	no	na	na	Arthropoda	Insecta	Coleoptera	Coccinellidae	Harmonia	Harmonia axyridis	Harmonia axyridis	predator	Chewing	na	natural population of variable ages	larva	Chronic toxicology	Rosemount, MN
1473	75	Wold et al.	2001	Journal of Entomological Science 36(2): 177-187	In-field monitoring of beneficial insect populations in transgenic corn expressing a Bacillus thuringiensis toxin	Academic & Government	Department of Entomology, University of Minnesota	na	na	yes	United States	North America	yes	3a	Semi-field	Table 2 (data from author)	no	na	maize	Cry1Ab	Lepidoptera	Bt11	GH-0937	Bonus	from tassel to brown silk	not specified	na	na	na	na	na	na	no	na	na	Arthropoda	Insecta	Coleoptera	Coccinellidae	not specified	not specified	Coccinellidae	predator	Chewing	na	natural population of variable ages	egg	Chronic toxicology	Rosemount, MN
1474	75	Wold et al.	2001	Journal of Entomological Science 36(2): 177-187	In-field monitoring of beneficial insect populations in transgenic corn expressing a Bacillus thuringiensis toxin	Academic & Government	Department of Entomology, University of Minnesota	na	na	yes	United States	North America	yes	3a	Semi-field	Table 2 (data from author)	no	na	maize	Cry1Ab	Lepidoptera	Bt11	GH-0937	Bonus	from tassel to brown silk	not specified	na	na	na	na	na	na	no	na	na	Arthropoda	Insecta	Hemiptera	Anthocoridae	Orius	not specified	Orius	predator	Piercing	na	natural population of variable ages	adult	Chronic toxicology	Rosemount, MN
1475	75	Wold et al.	2001	Journal of Entomological Science 36(2): 177-187	In-field monitoring of beneficial insect populations in transgenic corn expressing a Bacillus thuringiensis toxin	Academic & Government	Department of Entomology, University of Minnesota	na	na	yes	United States	North America	yes	3a	Semi-field	Table 2 (data from author)	no	na	maize	Cry1Ab	Lepidoptera	Bt11	GH-0937	Bonus	from tassel to brown silk	not specified	na	na	na	na	na	na	no	na	na	Arthropoda	Insecta	Hemiptera	Anthocoridae	Orius	not specified	Orius	predator	Piercing	na	natural population of variable ages	nymph	Chronic toxicology	Rosemount, MN
1476	75	Wold et al.	2001	Journal of Entomological Science 36(2): 177-187	In-field monitoring of beneficial insect populations in transgenic corn expressing a Bacillus thuringiensis toxin	Academic & Government	Department of Entomology, University of Minnesota	na	na	yes	United States	North America	yes	3a	Semi-field	Table 2 (data from author)	no	na	maize	Cry1Ab	Lepidoptera	Bt11	GH-0937	Bonus	from tassel to brown silk	not specified	na	na	na	na	na	na	no	na	na	Arthropoda	Insecta	Hemiptera	Nabidae	not specified	not specified	Nabidae	predator	Piercing	na	natural population of variable ages	adult and nymph	Chronic toxicology	Rosemount, MN
1477	75	Wold et al.	2001	Journal of Entomological Science 36(2): 177-187	In-field monitoring of beneficial insect populations in transgenic corn expressing a Bacillus thuringiensis toxin	Academic & Government	Department of Entomology, University of Minnesota	na	na	yes	United States	North America	yes	3a	Semi-field	Table 2 (data from author)	no	na	maize	Cry1Ab	Lepidoptera	Bt11	GH-0937	Bonus	from tassel to brown silk	not specified	na	na	na	na	na	na	no	na	na	Arthropoda	Insecta	Neuroptera	Chrysopidae	Chrysoperla	Chrysoperla carnea	Chrysoperla carnea	predator	Chewing	na	natural population of variable ages	adult	Chronic toxicology	Rosemount, MN
1478	75	Wold et al.	2001	Journal of Entomological Science 36(2): 177-187	In-field monitoring of beneficial insect populations in transgenic corn expressing a Bacillus thuringiensis toxin	Academic & Government	Department of Entomology, University of Minnesota	na	na	yes	United States	North America	yes	3a	Semi-field	Table 2 (data from author)	no	na	maize	Cry1Ab	Lepidoptera	Bt11	GH-0937	Bonus	from tassel to brown silk	not specified	na	na	na	na	na	na	no	na	na	Arthropoda	Insecta	Neuroptera	Chrysopidae	Chrysoperla	Chrysoperla carnea	Chrysoperla carnea	predator	Piercing	na	natural population of variable ages	larva	Chronic toxicology	Rosemount, MN
1479	75	Wold et al.	2001	Journal of Entomological Science 36(2): 177-187	In-field monitoring of beneficial insect populations in transgenic corn expressing a Bacillus thuringiensis toxin	Academic & Government	Department of Entomology, University of Minnesota	na	na	yes	United States	North America	yes	3a	Semi-field	Table 2 (data from author)	no	na	maize	Cry1Ab	Lepidoptera	Bt11	GH-0937	Bonus	from tassel to brown silk	not specified	na	na	na	na	na	na	no	na	na	Arthropoda	Insecta	Neuroptera	Chrysopidae	Chrysoperla	Chrysoperla carnea	Chrysoperla carnea	predator	Unknown	na	natural population of variable ages	egg	Chronic toxicology	Rosemount, MN
1480	75	Wold et al.	2001	Journal of Entomological Science 36(2): 177-187	In-field monitoring of beneficial insect populations in transgenic corn expressing a Bacillus thuringiensis toxin	Academic & Government	Department of Entomology, University of Minnesota	na	na	yes	United States	North America	yes	3a	Semi-field	Table 2 (data from author)	no	na	maize	Cry1Ab	Lepidoptera	Bt11	GH-0937	Bonus	from tassel to brown silk	not specified	na	na	na	na	na	na	no	na	na	Arthropoda	Insecta	Coleoptera	Coccinellidae	not specified	not specified	Coccinellidae	predator	Chewing	na	natural population of variable ages	pupae	Chronic toxicology	Rosemount, MN
1481	75	Wold et al.	2001	Journal of Entomological Science 36(2): 177-187	In-field monitoring of beneficial insect populations in transgenic corn expressing a Bacillus thuringiensis toxin	Academic & Government	Department of Entomology, University of Minnesota	na	na	yes	United States	North America	yes	3a	Semi-field	Table 2 (data from author)	no	na	maize	Cry1Ab	Lepidoptera	Bt11	GH-0937	Bonus	from tassel to brown silk	not specified	na	na	na	na	na	na	no	na	na	Arthropoda	Insecta	Hemiptera	Pentatomidae	Acrosternum	Acrosternum hilare	Acrosternum hilare	herbivore	Piercing	na	natural population of variable ages	adult and nymph	Chronic toxicology	Rosemount, MN
1496	75	Wold et al.	2001	Journal of Entomological Science 36(2): 177-187	In-field monitoring of beneficial insect populations in transgenic corn expressing a Bacillus thuringiensis toxin	Academic & Government	Department of Entomology, University of Minnesota	na	na	yes	United States	North America	yes	3b	Semi-field	Table 2 (data from author)	no	na	maize	Cry1Ab	Lepidoptera	Bt11	GH-0937	Bonus	from tassel to brown silk	not specified	na	na	na	na	na	na	no	na	na	Arthropoda	Insecta	Coleoptera	Coccinellidae	Coleomegilla	Coleomegilla maculata	Coleomegilla maculata	predator	Chewing	na	natural population of variable ages	adult	Chronic toxicology	Rosemount, MN
1497	75	Wold et al.	2001	Journal of Entomological Science 36(2): 177-187	In-field monitoring of beneficial insect populations in transgenic corn expressing a Bacillus thuringiensis toxin	Academic & Government	Department of Entomology, University of Minnesota	na	na	yes	United States	North America	yes	3b	Semi-field	Table 2 (data from author)	no	na	maize	Cry1Ab	Lepidoptera	Bt11	GH-0937	Bonus	from tassel to brown silk	not specified	na	na	na	na	na	na	no	na	na	Arthropoda	Insecta	Coleoptera	Coccinellidae	Coleomegilla	Coleomegilla maculata	Coleomegilla maculata	predator	Chewing	na	natural population of variable ages	larva	Chronic toxicology	Rosemount, MN
1498	75	Wold et al.	2001	Journal of Entomological Science 36(2): 177-187	In-field monitoring of beneficial insect populations in transgenic corn expressing a Bacillus thuringiensis toxin	Academic & Government	Department of Entomology, University of Minnesota	na	na	yes	United States	North America	yes	3b	Semi-field	Table 2 (data from author)	no	na	maize	Cry1Ab	Lepidoptera	Bt11	GH-0937	Bonus	from tassel to brown silk	not specified	na	na	na	na	na	na	no	na	na	Arthropoda	Insecta	Coleoptera	Coccinellidae	Hippodamia	Hippodamia tredecimpunctata	Hippodamia tredecimpunctata	predator	Chewing	na	natural population of variable ages	adult	Chronic toxicology	Rosemount, MN
1499	75	Wold et al.	2001	Journal of Entomological Science 36(2): 177-187	In-field monitoring of beneficial insect populations in transgenic corn expressing a Bacillus thuringiensis toxin	Academic & Government	Department of Entomology, University of Minnesota	na	na	yes	United States	North America	yes	3b	Semi-field	Table 2 (data from author)	no	na	maize	Cry1Ab	Lepidoptera	Bt11	GH-0937	Bonus	from tassel to brown silk	not specified	na	na	na	na	na	na	no	na	na	Arthropoda	Insecta	Coleoptera	Coccinellidae	Hippodamia	Hippodamia tredecimpunctata	Hippodamia tredecimpunctata	predator	Chewing	na	natural population of variable ages	larva	Chronic toxicology	Rosemount, MN
1500	75	Wold et al.	2001	Journal of Entomological Science 36(2): 177-187	In-field monitoring of beneficial insect populations in transgenic corn expressing a Bacillus thuringiensis toxin	Academic & Government	Department of Entomology, University of Minnesota	na	na	yes	United States	North America	yes	3b	Semi-field	Table 2 (data from author)	no	na	maize	Cry1Ab	Lepidoptera	Bt11	GH-0937	Bonus	from tassel to brown silk	not specified	na	na	na	na	na	na	no	na	na	Arthropoda	Insecta	Coleoptera	Coccinellidae	Harmonia	Harmonia axyridis	Harmonia axyridis	predator	Chewing	na	natural population of variable ages	adult	Chronic toxicology	Rosemount, MN
1501	75	Wold et al.	2001	Journal of Entomological Science 36(2): 177-187	In-field monitoring of beneficial insect populations in transgenic corn expressing a Bacillus thuringiensis toxin	Academic & Government	Department of Entomology, University of Minnesota	na	na	yes	United States	North America	yes	3b	Semi-field	Table 2 (data from author)	no	na	maize	Cry1Ab	Lepidoptera	Bt11	GH-0937	Bonus	from tassel to brown silk	not specified	na	na	na	na	na	na	no	na	na	Arthropoda	Insecta	Coleoptera	Coccinellidae	Harmonia	Harmonia axyridis	Harmonia axyridis	predator	Chewing	na	natural population of variable ages	larva	Chronic toxicology	Rosemount, MN
1502	75	Wold et al.	2001	Journal of Entomological Science 36(2): 177-187	In-field monitoring of beneficial insect populations in transgenic corn expressing a Bacillus thuringiensis toxin	Academic & Government	Department of Entomology, University of Minnesota	na	na	yes	United States	North America	yes	3b	Semi-field	Table 2 (data from author)	no	na	maize	Cry1Ab	Lepidoptera	Bt11	GH-0937	Bonus	from tassel to brown silk	not specified	na	na	na	na	na	na	no	na	na	Arthropoda	Insecta	Coleoptera	Coccinellidae	not specified	not specified	Coccinellidae	predator	Chewing	na	natural population of variable ages	egg	Chronic toxicology	Rosemount, MN
1503	75	Wold et al.	2001	Journal of Entomological Science 36(2): 177-187	In-field monitoring of beneficial insect populations in transgenic corn expressing a Bacillus thuringiensis toxin	Academic & Government	Department of Entomology, University of Minnesota	na	na	yes	United States	North America	yes	3b	Semi-field	Table 2 (data from author)	no	na	maize	Cry1Ab	Lepidoptera	Bt11	GH-0937	Bonus	from tassel to brown silk	not specified	na	na	na	na	na	na	no	na	na	Arthropoda	Insecta	Hemiptera	Anthocoridae	Orius	not specified	Orius	predator	Piercing	na	natural population of variable ages	adult	Chronic toxicology	Rosemount, MN
1504	75	Wold et al.	2001	Journal of Entomological Science 36(2): 177-187	In-field monitoring of beneficial insect populations in transgenic corn expressing a Bacillus thuringiensis toxin	Academic & Government	Department of Entomology, University of Minnesota	na	na	yes	United States	North America	yes	3b	Semi-field	Table 2 (data from author)	no	na	maize	Cry1Ab	Lepidoptera	Bt11	GH-0937	Bonus	from tassel to brown silk	not specified	na	na	na	na	na	na	no	na	na	Arthropoda	Insecta	Hemiptera	Anthocoridae	Orius	not specified	Orius	predator	Piercing	na	natural population of variable ages	nymph	Chronic toxicology	Rosemount, MN
1505	75	Wold et al.	2001	Journal of Entomological Science 36(2): 177-187	In-field monitoring of beneficial insect populations in transgenic corn expressing a Bacillus thuringiensis toxin	Academic & Government	Department of Entomology, University of Minnesota	na	na	yes	United States	North America	yes	3b	Semi-field	Table 2 (data from author)	no	na	maize	Cry1Ab	Lepidoptera	Bt11	GH-0937	Bonus	from tassel to brown silk	not specified	na	na	na	na	na	na	no	na	na	Arthropoda	Insecta	Hemiptera	Nabidae	not specified	not specified	Nabidae	predator	Piercing	na	natural population of variable ages	adult and nymph	Chronic toxicology	Rosemount, MN
1506	75	Wold et al.	2001	Journal of Entomological Science 36(2): 177-187	In-field monitoring of beneficial insect populations in transgenic corn expressing a Bacillus thuringiensis toxin	Academic & Government	Department of Entomology, University of Minnesota	na	na	yes	United States	North America	yes	3b	Semi-field	Table 2 (data from author)	no	na	maize	Cry1Ab	Lepidoptera	Bt11	GH-0937	Bonus	from tassel to brown silk	not specified	na	na	na	na	na	na	no	na	na	Arthropoda	Insecta	Neuroptera	Chrysopidae	Chrysoperla	Chrysoperla carnea	Chrysoperla carnea	predator	Chewing	na	natural population of variable ages	adult	Chronic toxicology	Rosemount, MN
1507	75	Wold et al.	2001	Journal of Entomological Science 36(2): 177-187	In-field monitoring of beneficial insect populations in transgenic corn expressing a Bacillus thuringiensis toxin	Academic & Government	Department of Entomology, University of Minnesota	na	na	yes	United States	North America	yes	3b	Semi-field	Table 2 (data from author)	no	na	maize	Cry1Ab	Lepidoptera	Bt11	GH-0937	Bonus	from tassel to brown silk	not specified	na	na	na	na	na	na	no	na	na	Arthropoda	Insecta	Neuroptera	Chrysopidae	Chrysoperla	Chrysoperla carnea	Chrysoperla carnea	predator	Unknown	na	natural population of variable ages	egg	Chronic toxicology	Rosemount, MN
1508	75	Wold et al.	2001	Journal of Entomological Science 36(2): 177-187	In-field monitoring of beneficial insect populations in transgenic corn expressing a Bacillus thuringiensis toxin	Academic & Government	Department of Entomology, University of Minnesota	na	na	yes	United States	North America	yes	3b	Semi-field	Table 2 (data from author)	no	na	maize	Cry1Ab	Lepidoptera	Bt11	GH-0937	Bonus	from tassel to brown silk	not specified	na	na	na	na	na	na	no	na	na	Arthropoda	Insecta	Coleoptera	Coccinellidae	not specified	not specified	Coccinellidae	predator	Chewing	na	natural population of variable ages	pupae	Chronic toxicology	Rosemount, MN
1510	76	Wilson et al.	1992	Journal of Economic Entomology 85(4): 1516-1521	Resistance of cotton lines containing a Bacillus thuringiensis toxin to pink bollworm (Lepidoptera: Gelechiidae) and other insects	Corporate & Academic	Western Cotton Research Laboratory, USDA-ARS	na	na	yes	United States	North America	yes	1a	Field	Table 3	no	na	cotton	Cry1Ab	Lepidoptera	not specified	62 (number designated by Monsanto)	Coker 312	sampled throughout season	not specified	na	na	na	na	na	na	no	na	na	Arthropoda	Insecta	Hemiptera	Miridae	Lygus	Lygus hesperus	Lygus hesperus	herbivore	Piercing	CMUE	natural population of variable ages	adult	Chronic toxicology	Pinal County, Arizona
1511	76	Wilson et al.	1992	Journal of Economic Entomology 85(4): 1516-1521	Resistance of cotton lines containing a Bacillus thuringiensis toxin to pink bollworm (Lepidoptera: Gelechiidae) and other insects	Corporate & Academic	Western Cotton Research Laboratory, USDA-ARS	na	na	yes	United States	North America	yes	1a	Field	Table 3	no	na	cotton	Cry1Ab	Lepidoptera	not specified	62 (number designated by Monsanto)	Coker 312	sampled throughout season	not specified	na	na	na	na	na	na	no	na	na	Arthropoda	Insecta	Thysanoptera	Thripidae	Frankliniella	not specified	Frankliniella	herbivore	Rasping	CMUE	natural population of variable ages	all stages	Chronic toxicology	Pinal County, Arizona
1512	76	Wilson et al.	1992	Journal of Economic Entomology 85(4): 1516-1521	Resistance of cotton lines containing a Bacillus thuringiensis toxin to pink bollworm (Lepidoptera: Gelechiidae) and other insects	Corporate & Academic	Western Cotton Research Laboratory, USDA-ARS	na	na	yes	United States	North America	yes	1a	Field	Table 3	no	na	cotton	Cry1Ab	Lepidoptera	not specified	62 (number designated by Monsanto)	Coker 312	sampled throughout season	not specified	na	na	na	na	na	na	no	na	na	Arthropoda	Insecta	Hemiptera	Aleyrodidae	Bemisia	Bemisia tabaci	Bemisia tabaci	herbivore	Piercing	CMUE	natural population of variable ages	immature	Chronic toxicology	Pinal County, Arizona
1513	76	Wilson et al.	1992	Journal of Economic Entomology 85(4): 1516-1521	Resistance of cotton lines containing a Bacillus thuringiensis toxin to pink bollworm (Lepidoptera: Gelechiidae) and other insects	Corporate & Academic	Western Cotton Research Laboratory, USDA-ARS	na	na	yes	United States	North America	yes	1b	Field	Table 3	no	na	cotton	Cry1Ab	Lepidoptera	not specified	65 (number designated by Monsanto)	Coker 312	sampled throughout season	not specified	na	na	na	na	na	na	no	na	na	Arthropoda	Insecta	Hemiptera	Miridae	Lygus	Lygus hesperus	Lygus hesperus	herbivore	Piercing	CMUE	natural population of variable ages	adult	Chronic toxicology	Pinal County, Arizona
1514	76	Wilson et al.	1992	Journal of Economic Entomology 85(4): 1516-1521	Resistance of cotton lines containing a Bacillus thuringiensis toxin to pink bollworm (Lepidoptera: Gelechiidae) and other insects	Corporate & Academic	Western Cotton Research Laboratory, USDA-ARS	na	na	yes	United States	North America	yes	1b	Field	Table 3	no	na	cotton	Cry1Ab	Lepidoptera	not specified	65 (number designated by Monsanto)	Coker 312	sampled throughout season	not specified	na	na	na	na	na	na	no	na	na	Arthropoda	Insecta	Thysanoptera	Thripidae	Frankliniella	not specified	Frankliniella	herbivore	Rasping	CMUE	natural population of variable ages	all stages	Chronic toxicology	Pinal County, Arizona
1515	76	Wilson et al.	1992	Journal of Economic Entomology 85(4): 1516-1521	Resistance of cotton lines containing a Bacillus thuringiensis toxin to pink bollworm (Lepidoptera: Gelechiidae) and other insects	Corporate & Academic	Western Cotton Research Laboratory, USDA-ARS	na	na	yes	United States	North America	yes	1b	Field	Table 3	no	na	cotton	Cry1Ab	Lepidoptera	not specified	65 (number designated by Monsanto)	Coker 312	sampled throughout season	not specified	na	na	na	na	na	na	no	na	na	Arthropoda	Insecta	Hemiptera	Aleyrodidae	Bemisia	Bemisia tabaci	Bemisia tabaci	herbivore	Piercing	CMUE	natural population of variable ages	immature	Chronic toxicology	Pinal County, Arizona
1516	76	Wilson et al.	1992	Journal of Economic Entomology 85(4): 1516-1521	Resistance of cotton lines containing a Bacillus thuringiensis toxin to pink bollworm (Lepidoptera: Gelechiidae) and other insects	Corporate & Academic	Western Cotton Research Laboratory, USDA-ARS	na	na	yes	United States	North America	yes	1c	Field	Table 3	no	na	cotton	Cry1Ab	Lepidoptera	not specified	82 (number designated by Monsanto)	Coker 312	sampled throughout season	not specified	na	na	na	na	na	na	no	na	na	Arthropoda	Insecta	Hemiptera	Miridae	Lygus	Lygus hesperus	Lygus hesperus	herbivore	Piercing	CMUE	natural population of variable ages	adult	Chronic toxicology	Pinal County, Arizona
1517	76	Wilson et al.	1992	Journal of Economic Entomology 85(4): 1516-1521	Resistance of cotton lines containing a Bacillus thuringiensis toxin to pink bollworm (Lepidoptera: Gelechiidae) and other insects	Corporate & Academic	Western Cotton Research Laboratory, USDA-ARS	na	na	yes	United States	North America	yes	1c	Field	Table 3	no	na	cotton	Cry1Ab	Lepidoptera	not specified	82 (number designated by Monsanto)	Coker 312	sampled throughout season	not specified	na	na	na	na	na	na	no	na	na	Arthropoda	Insecta	Thysanoptera	Thripidae	Frankliniella	not specified	Frankliniella	herbivore	Rasping	CMUE	natural population of variable ages	all stages	Chronic toxicology	Pinal County, Arizona
1518	76	Wilson et al.	1992	Journal of Economic Entomology 85(4): 1516-1521	Resistance of cotton lines containing a Bacillus thuringiensis toxin to pink bollworm (Lepidoptera: Gelechiidae) and other insects	Corporate & Academic	Western Cotton Research Laboratory, USDA-ARS	na	na	yes	United States	North America	yes	1c	Field	Table 3	no	na	cotton	Cry1Ab	Lepidoptera	not specified	82 (number designated by Monsanto)	Coker 312	sampled throughout season	not specified	na	na	na	na	na	na	no	na	na	Arthropoda	Insecta	Hemiptera	Aleyrodidae	Bemisia	Bemisia tabaci	Bemisia tabaci	herbivore	Piercing	CMUE	natural population of variable ages	immature	Chronic toxicology	Pinal County, Arizona
1526	83	Al-Deeb et al. [a]	2001	Environmental Entomology 30(3): 625-629	No effect of Bacillus thuringiensis corn and Bacillus thuringiensis on the predator Orius insidiosus (Hemiptera: Anthocoridae)	Academic	Department of Entomology, Kansas State University	na	na	yes	United States	North America	no	1	Field	Table 3	no	na	maize	Cry1Ab & Cry1Ac	Lepidoptera	MON810 & DBT-418	DK 647-BtY, DK 626Btx & Agripro 9689	Pioneer 3237, Dekalb 632 & Agripro 9565	counts done during silking stage	not specified	na	na	na	na	na	na	no	na	na	Arthropoda	Insecta	Hemiptera	Anthocoridae	Orius	Orius insidiosus	Orius insidiosus	predator	Piercing	na	natural population of variable ages	nymph	Chronic toxicology	Abilene & Clay Center, Kansas
1527	83	Al-Deeb et al. [a]	2001	Environmental Entomology 30(3): 625-629	No effect of Bacillus thuringiensis corn and Bacillus thuringiensis on the predator Orius insidiosus (Hemiptera: Anthocoridae)	Academic	Department of Entomology, Kansas State University	na	na	yes	United States	North America	no	1	Field	Table 3	no	na	maize	Cry1Ab & Cry1Ac	Lepidoptera	MON810 & DBT-418	DK 647-BtY, DK 626Btx & Agripro 9689	Pioneer 3237, Dekalb 632 & Agripro 9565	counts done during silking stage	not specified	na	na	na	na	na	na	no	na	na	Arthropoda	Insecta	Hemiptera	Anthocoridae	Orius	Orius insidiosus	Orius insidiosus	predator	Piercing	na	natural population of variable ages	adult	Chronic toxicology	Abilene & Clay Center, Kansas
1553	85	Riddick et al. [b]	2000	Journal of Entomological Science 35(4): 349-359	Season-long abundance of generalist predators in transgenic versus nontransgenic potato fields	Academic	Department of Entomology, University of Maryland	na	na	yes	United States	North America	yes	1	Field	Figure 1	yes	yes	potato	Cry3A	Coleoptera	not specified	transgenic Russet Burbank	Russet Burbank potato	sampled throughout season	28.27	na	cited from EPA document	na	na	na	na	no	na	na	Arthropoda	Insecta	Hemiptera	Anthocoridae	Orius	Orius insidiosus	Orius insidiosus	predator	Piercing	na	natural population of variable ages	adult & late stage nymph	Chronic toxicology	Maryland
1554	85	Riddick et al. [b]	2000	Journal of Entomological Science 35(4): 349-359	Season-long abundance of generalist predators in transgenic versus nontransgenic potato fields	Academic	Department of Entomology, University of Maryland	na	na	yes	United States	North America	yes	1	Field	Figure 1	yes	yes	potato	Cry3A	Coleoptera	not specified	transgenic Russet Burbank	Russet Burbank potato	sampled throughout season	28.27	na	cited from EPA document	na	na	na	na	no	na	na	Arthropoda	Insecta	Hemiptera	Geocoridae	Geocoris	Geocoris punctipes	Geocoris punctipes	predator	Piercing	na	natural population of variable ages	adult & late stage nymph	Chronic toxicology	Maryland
1555	85	Riddick et al. [b]	2000	Journal of Entomological Science 35(4): 349-359	Season-long abundance of generalist predators in transgenic versus nontransgenic potato fields	Academic	Department of Entomology, University of Maryland	na	na	yes	United States	North America	yes	1	Field	Figure 1	yes	yes	potato	Cry3A	Coleoptera	not specified	transgenic Russet Burbank	Russet Burbank potato	sampled throughout season	28.27	na	cited from EPA document	na	na	na	na	no	na	na	Arthropoda	Insecta	Hemiptera	Nabidae	Nabis	not specified	Nabis	predator	Piercing	na	natural population of variable ages	adult & late stage nymph	Chronic toxicology	Maryland
1556	85	Riddick et al. [b]	2000	Journal of Entomological Science 35(4): 349-359	Season-long abundance of generalist predators in transgenic versus nontransgenic potato fields	Academic	Department of Entomology, University of Maryland	na	na	yes	United States	North America	yes	1	Field	Figure 1	yes	yes	potato	Cry3A	Coleoptera	not specified	transgenic Russet Burbank	Russet Burbank potato	sampled throughout season	28.27	na	cited from EPA document	na	na	na	na	no	na	na	Arthropoda	Insecta	Hemiptera	Anthocoridae	Orius	Orius insidiosus	Orius insidiosus	predator	Piercing	na	natural population of variable ages	adult & late stage nymph	Chronic toxicology	Maryland
1557	85	Riddick et al. [b]	2000	Journal of Entomological Science 35(4): 349-359	Season-long abundance of generalist predators in transgenic versus nontransgenic potato fields	Academic	Department of Entomology, University of Maryland	na	na	yes	United States	North America	yes	1	Field	Figure 1	yes	yes	potato	Cry3A	Coleoptera	not specified	transgenic Russet Burbank	Russet Burbank potato	sampled throughout season	28.27	na	cited from EPA document	na	na	na	na	no	na	na	Arthropoda	Insecta	Hemiptera	Geocoridae	Geocoris	Geocoris punctipes	Geocoris punctipes	predator	Piercing	na	natural population of variable ages	adult & late stage nymph	Chronic toxicology	Maryland
1558	85	Riddick et al. [b]	2000	Journal of Entomological Science 35(4): 349-359	Season-long abundance of generalist predators in transgenic versus nontransgenic potato fields	Academic	Department of Entomology, University of Maryland	na	na	yes	United States	North America	yes	1	Field	Figure 1	yes	yes	potato	Cry3A	Coleoptera	not specified	transgenic Russet Burbank	Russet Burbank potato	sampled throughout season	28.27	na	cited from EPA document	na	na	na	na	no	na	na	Arthropoda	Insecta	Hemiptera	Nabidae	Nabis	not specified	Nabis	predator	Piercing	na	natural population of variable ages	adult & late stage nymph	Chronic toxicology	Maryland
1559	85	Riddick et al. [b]	2000	Journal of Entomological Science 35(4): 349-359	Season-long abundance of generalist predators in transgenic versus nontransgenic potato fields	Academic	Department of Entomology, University of Maryland	na	na	yes	United States	North America	yes	1	Field	Figure 2	yes	yes	potato	Cry3A	Coleoptera	not specified	transgenic Russet Burbank	Russet Burbank potato	sampled throughout season	28.27	na	cited from EPA document	na	na	na	na	no	na	na	Arthropoda	Insecta	Coleoptera	Coccinellidae	Coccinella	Coccinella septempunctata	Coccinella septempunctata	predator	Chewing	na	natural population of variable ages	adult	Chronic toxicology	Maryland
1560	85	Riddick et al. [b]	2000	Journal of Entomological Science 35(4): 349-359	Season-long abundance of generalist predators in transgenic versus nontransgenic potato fields	Academic	Department of Entomology, University of Maryland	na	na	yes	United States	North America	yes	1	Field	Figure 2	yes	yes	potato	Cry3A	Coleoptera	not specified	transgenic Russet Burbank	Russet Burbank potato	sampled throughout season	28.27	na	cited from EPA document	na	na	na	na	no	na	na	Arthropoda	Insecta	Coleoptera	Coccinellidae	Harmonia	Harmonia axyridis	Harmonia axyridis	predator	Chewing	na	natural population of variable ages	adult	Chronic toxicology	Maryland
1561	85	Riddick et al. [b]	2000	Journal of Entomological Science 35(4): 349-359	Season-long abundance of generalist predators in transgenic versus nontransgenic potato fields	Academic	Department of Entomology, University of Maryland	na	na	yes	United States	North America	yes	1	Field	Figure 2	yes	yes	potato	Cry3A	Coleoptera	not specified	transgenic Russet Burbank	Russet Burbank potato	sampled throughout season	28.27	na	cited from EPA document	na	na	na	na	no	na	na	Arthropoda	Insecta	Coleoptera	Coccinellidae	Hippodamia	Hippodamia convergens	Hippodamia convergens	predator	Chewing	na	natural population of variable ages	adult	Chronic toxicology	Maryland
1562	85	Riddick et al. [b]	2000	Journal of Entomological Science 35(4): 349-359	Season-long abundance of generalist predators in transgenic versus nontransgenic potato fields	Academic	Department of Entomology, University of Maryland	na	na	yes	United States	North America	yes	1	Field	Figure 2	yes	yes	potato	Cry3A	Coleoptera	not specified	transgenic Russet Burbank	Russet Burbank potato	sampled throughout season	28.27	na	cited from EPA document	na	na	na	na	no	na	na	Arthropoda	Insecta	Coleoptera	Coccinellidae	Coccinella	Coccinella septempunctata	Coccinella septempunctata	predator	Chewing	na	natural population of variable ages	adult	Chronic toxicology	Maryland
1563	85	Riddick et al. [b]	2000	Journal of Entomological Science 35(4): 349-359	Season-long abundance of generalist predators in transgenic versus nontransgenic potato fields	Academic	Department of Entomology, University of Maryland	na	na	yes	United States	North America	yes	1	Field	Figure 2	yes	yes	potato	Cry3A	Coleoptera	not specified	transgenic Russet Burbank	Russet Burbank potato	sampled throughout season	28.27	na	cited from EPA document	na	na	na	na	no	na	na	Arthropoda	Insecta	Coleoptera	Coccinellidae	Harmonia	Harmonia axyridis	Harmonia axyridis	predator	Chewing	na	natural population of variable ages	adult	Chronic toxicology	Maryland
1564	85	Riddick et al. [b]	2000	Journal of Entomological Science 35(4): 349-359	Season-long abundance of generalist predators in transgenic versus nontransgenic potato fields	Academic	Department of Entomology, University of Maryland	na	na	yes	United States	North America	yes	1	Field	Figure 2	yes	yes	potato	Cry3A	Coleoptera	not specified	transgenic Russet Burbank	Russet Burbank potato	sampled throughout season	28.27	na	cited from EPA document	na	na	na	na	no	na	na	Arthropoda	Insecta	Coleoptera	Coccinellidae	Hippodamia	Hippodamia convergens	Hippodamia convergens	predator	Chewing	na	natural population of variable ages	adult	Chronic toxicology	Maryland
1565	85	Riddick et al. [b]	2000	Journal of Entomological Science 35(4): 349-359	Season-long abundance of generalist predators in transgenic versus nontransgenic potato fields	Academic	Department of Entomology, University of Maryland	na	na	yes	United States	North America	yes	1	Field	Figure 3	yes	yes	potato	Cry3A	Coleoptera	not specified	transgenic Russet Burbank	Russet Burbank potato	sampled throughout season	28.27	na	cited from EPA document	na	na	na	na	no	na	na	Arthropoda	Insecta	Coleoptera	Cicindelidae	Cicindela	Cicindela punctulata punctulata	Cicindela punctulata punctulata	predator	Chewing	na	natural population of variable ages	adult	Chronic toxicology	Maryland
1566	85	Riddick et al. [b]	2000	Journal of Entomological Science 35(4): 349-359	Season-long abundance of generalist predators in transgenic versus nontransgenic potato fields	Academic	Department of Entomology, University of Maryland	na	na	yes	United States	North America	yes	1	Field	Figure 3	yes	yes	potato	Cry3A	Coleoptera	not specified	transgenic Russet Burbank	Russet Burbank potato	sampled throughout season	28.27	na	cited from EPA document	na	na	na	na	no	na	na	Arthropoda	Insecta	Coleoptera	Carabidae	Poecilus	Poecilus chalcites & Poecilus lucublandus lucublandus	Poecilus chalcites & Poecilus lucublandus lucublandus	predator	Chewing	na	natural population of variable ages	adult	Chronic toxicology	Maryland
1567	85	Riddick et al. [b]	2000	Journal of Entomological Science 35(4): 349-359	Season-long abundance of generalist predators in transgenic versus nontransgenic potato fields	Academic	Department of Entomology, University of Maryland	na	na	yes	United States	North America	yes	1	Field	Figure 3	yes	yes	potato	Cry3A	Coleoptera	not specified	transgenic Russet Burbank	Russet Burbank potato	sampled throughout season	28.27	na	cited from EPA document	na	na	na	na	no	na	na	Arthropoda	Insecta	Coleoptera	Carabidae	Scarites	Scarites subterraneus & Scarites quadriceps	Scarites subterraneus & Scarites quadriceps	predator	Chewing	na	natural population of variable ages	adult	Chronic toxicology	Maryland
1568	85	Riddick et al. [b]	2000	Journal of Entomological Science 35(4): 349-359	Season-long abundance of generalist predators in transgenic versus nontransgenic potato fields	Academic	Department of Entomology, University of Maryland	na	na	yes	United States	North America	yes	1	Field	Figure 3	yes	yes	potato	Cry3A	Coleoptera	not specified	transgenic Russet Burbank	Russet Burbank potato	sampled throughout season	28.27	na	cited from EPA document	na	na	na	na	no	na	na	Arthropoda	Insecta	Coleoptera	Cicindelidae	Cicindela	Cicindela punctulata punctulata	Cicindela punctulata punctulata	predator	Chewing	na	natural population of variable ages	adult	Chronic toxicology	Maryland
1569	85	Riddick et al. [b]	2000	Journal of Entomological Science 35(4): 349-359	Season-long abundance of generalist predators in transgenic versus nontransgenic potato fields	Academic	Department of Entomology, University of Maryland	na	na	yes	United States	North America	yes	1	Field	Figure 3	yes	yes	potato	Cry3A	Coleoptera	not specified	transgenic Russet Burbank	Russet Burbank potato	sampled throughout season	28.27	na	cited from EPA document	na	na	na	na	no	na	na	Arthropoda	Insecta	Coleoptera	Carabidae	Poecilus	Poecilus chalcites & Poecilus lucublandus lucublandus	Poecilus chalcites & Poecilus lucublandus lucublandus	predator	Chewing	na	natural population of variable ages	adult	Chronic toxicology	Maryland
1570	85	Riddick et al. [b]	2000	Journal of Entomological Science 35(4): 349-359	Season-long abundance of generalist predators in transgenic versus nontransgenic potato fields	Academic	Department of Entomology, University of Maryland	na	na	yes	United States	North America	yes	1	Field	Figure 3	yes	yes	potato	Cry3A	Coleoptera	not specified	transgenic Russet Burbank	Russet Burbank potato	sampled throughout season	28.27	na	cited from EPA document	na	na	na	na	no	na	na	Arthropoda	Insecta	Coleoptera	Carabidae	Scarites	Scarites subterraneus & Scarites quadriceps	Scarites subterraneus & Scarites quadriceps	predator	Chewing	na	natural population of variable ages	adult	Chronic toxicology	Maryland
1571	85	Riddick et al. [b]	2000	Journal of Entomological Science 35(4): 349-359	Season-long abundance of generalist predators in transgenic versus nontransgenic potato fields	Academic	Department of Entomology, University of Maryland	na	na	yes	United States	North America	yes	1	Field	Figure 4	yes	yes	potato	Cry3A	Coleoptera	not specified	transgenic Russet Burbank	Russet Burbank potato	sampled throughout season	28.27	na	cited from EPA document	na	na	na	na	no	na	na	Arthropoda	Insecta	Hymenoptera	Formicidae	not specified	not specified	Formicidae	omnivore	Mandibulate-sucking	na	natural population of variable ages	not specified	Chronic toxicology	Maryland
1572	85	Riddick et al. [b]	2000	Journal of Entomological Science 35(4): 349-359	Season-long abundance of generalist predators in transgenic versus nontransgenic potato fields	Academic	Department of Entomology, University of Maryland	na	na	yes	United States	North America	yes	1	Field	Figure 4	yes	yes	potato	Cry3A	Coleoptera	not specified	transgenic Russet Burbank	Russet Burbank potato	sampled throughout season	28.27	na	cited from EPA document	na	na	na	na	no	na	na	Arthropoda	Arachnida	Araneae	not specified	not specified	not specified	Araneae	predator	Piercing	na	natural population of variable ages	not specified	Chronic toxicology	Maryland
1573	85	Riddick et al. [b]	2000	Journal of Entomological Science 35(4): 349-359	Season-long abundance of generalist predators in transgenic versus nontransgenic potato fields	Academic	Department of Entomology, University of Maryland	na	na	yes	United States	North America	yes	1	Field	Figure 6	yes	yes	potato	Cry3A	Coleoptera	not specified	transgenic Russet Burbank	Russet Burbank potato	sampled throughout season	28.27	na	cited from EPA document	na	na	na	na	no	na	na	Arthropoda	Insecta	Hemiptera	Aphididae	not specified	not specified	Aphididae	herbivore	Piercing	na	natural population of variable ages	adult and nymph	Chronic toxicology	Maryland
1574	85	Riddick et al. [b]	2000	Journal of Entomological Science 35(4): 349-359	Season-long abundance of generalist predators in transgenic versus nontransgenic potato fields	Academic	Department of Entomology, University of Maryland	na	na	yes	United States	North America	yes	1	Field	Figure 6	yes	yes	potato	Cry3A	Coleoptera	not specified	transgenic Russet Burbank	Russet Burbank potato	sampled throughout season	28.27	na	cited from EPA document	na	na	na	na	no	na	na	Arthropoda	Insecta	Hemiptera	Aphididae	not specified	not specified	Aphididae	herbivore	Piercing	na	natural population of variable ages	adult and nymph	Chronic toxicology	Maryland
1577	86	Dowd [b]	2000	Journal of Economic Entomology 93(6): 1714-1720	Dusky sap beetles (Coleoptera: Nitidulidae) and other kernel damaging insects in Bt and non-Bt sweet corn in Illinois	Government	Bioactive Agents Research Unit, National Center for Agricultural Utilization Research, USDA-ARS	na	na	yes	United States	North America	no	1	Field	Table 2	no	na	maize	Cry1Ab	Lepidoptera	not specified	Rogers 'Empire' Bt	Rogers 'Empire' non-transgenic	sampling began when <5% of the plants were silking	not specified	na	na	na	na	na	na	no	na	na	Arthropoda	Insecta	Coleoptera	Nitidulidae	Carpophilus	Carpophilus lugubris	Carpophilus lugubris	omnivore	Chewing	TGLE	natural population of variable ages	not specified	Chronic toxicology	Illinois
1578	86	Dowd [b]	2000	Journal of Economic Entomology 93(6): 1714-1720	Dusky sap beetles (Coleoptera: Nitidulidae) and other kernel damaging insects in Bt and non-Bt sweet corn in Illinois	Government	Bioactive Agents Research Unit, National Center for Agricultural Utilization Research, USDA-ARS	na	na	yes	United States	North America	no	1	Field	Table 2	no	na	maize	Cry1Ab	Lepidoptera	not specified	Rogers 'Empire' Bt	Rogers 'Empire' non-transgenic	sampling began when <5% of the plants were silking	not specified	na	na	na	na	na	na	no	na	na	Arthropoda	Insecta	Coleoptera	Nitidulidae	Carpophilus	Carpophilus lugubris	Carpophilus lugubris	omnivore	Chewing	TGLE	natural population of variable ages	not specified	Chronic toxicology	Illinois
1589	86	Dowd [b]	2000	Journal of Economic Entomology 93(6): 1714-1720	Dusky sap beetles (Coleoptera: Nitidulidae) and other kernel damaging insects in Bt and non-Bt sweet corn in Illinois	Government	Bioactive Agents Research Unit, National Center for Agricultural Utilization Research, USDA-ARS	na	na	yes	United States	North America	no	2	Field	Table 2	no	na	maize	Cry1Ab	Lepidoptera	not specified	Rogers 'Empire' Bt	Rogers 'Empire' non-transgenic	sampling began when <5% of the plants were silking	not specified	na	na	na	na	na	na	no	na	na	Arthropoda	Insecta	Coleoptera	Nitidulidae	Carpophilus	Carpophilus lugubris	Carpophilus lugubris	omnivore	Chewing	TGLE	natural population of variable ages	not specified	Chronic toxicology	Illinois
1590	86	Dowd [b]	2000	Journal of Economic Entomology 93(6): 1714-1720	Dusky sap beetles (Coleoptera: Nitidulidae) and other kernel damaging insects in Bt and non-Bt sweet corn in Illinois	Government	Bioactive Agents Research Unit, National Center for Agricultural Utilization Research, USDA-ARS	na	na	yes	United States	North America	no	2	Field	Table 2	no	na	maize	Cry1Ab	Lepidoptera	not specified	Rogers 'Empire' Bt	Rogers 'Empire' non-transgenic	sampling began when <5% of the plants were silking	not specified	na	na	na	na	na	na	no	na	na	Arthropoda	Insecta	Coleoptera	Nitidulidae	Carpophilus	Carpophilus lugubris	Carpophilus lugubris	omnivore	Chewing	TGLE	natural population of variable ages	not specified	Chronic toxicology	Illinois
1602	88	Al-Deeb & Wilde	2003	Environmental Entomology 32(5): 1164-1170	Effect of Bt corn expressing the Cry3Bb1 toxin for corn rootworm control on aboveground nontarget arthropods	Academic	Department of Entomology, Kansas State University	na	na	yes	United States	North America	yes	1	Field	Table 1	no	na	maize	Cry3Bb	Coleoptera	MON863	not specified	not specified	silk stage	61.5	30-93	cited from EPA document	na	na	na	na	no	na	na	Arthropoda	Insecta	Hemiptera	Anthocoridae	Orius	Orius insidiosus	Orius insidiosus	predator	Piercing	na	natural population of variable ages	adult	Chronic toxicology	Manhattan, Kansas
1603	88	Al-Deeb & Wilde	2003	Environmental Entomology 32(5): 1164-1170	Effect of Bt corn expressing the Cry3Bb1 toxin for corn rootworm control on aboveground nontarget arthropods	Academic	Department of Entomology, Kansas State University	na	na	yes	United States	North America	yes	1	Field	Table 1	no	na	maize	Cry3Bb	Coleoptera	MON863	not specified	not specified	silk stage	61.5	30-93	cited from EPA document	na	na	na	na	no	na	na	Arthropoda	Insecta	Hemiptera	Anthocoridae	Orius	Orius insidiosus	Orius insidiosus	predator	Piercing	na	natural population of variable ages	nymph	Chronic toxicology	Manhattan, Kansas
1604	88	Al-Deeb & Wilde	2003	Environmental Entomology 32(5): 1164-1170	Effect of Bt corn expressing the Cry3Bb1 toxin for corn rootworm control on aboveground nontarget arthropods	Academic	Department of Entomology, Kansas State University	na	na	yes	United States	North America	yes	1	Field	Table 1	no	na	maize	Cry3Bb	Coleoptera	MON863	not specified	not specified	silk stage	61.5	30-93	cited from EPA document	na	na	na	na	no	na	na	Arthropoda	Insecta	Coleoptera	Coccinellidae	Coleomegilla	Coleomegilla maculata	Coleomegilla maculata	predator	Chewing	na	natural population of variable ages	adult	Chronic toxicology	Manhattan, Kansas
1605	88	Al-Deeb & Wilde	2003	Environmental Entomology 32(5): 1164-1170	Effect of Bt corn expressing the Cry3Bb1 toxin for corn rootworm control on aboveground nontarget arthropods	Academic	Department of Entomology, Kansas State University	na	na	yes	United States	North America	yes	1	Field	Table 1	no	na	maize	Cry3Bb	Coleoptera	MON863	not specified	not specified	silk stage	61.5	30-93	cited from EPA document	na	na	na	na	no	na	na	Arthropoda	Insecta	Coleoptera	Coccinellidae	Hippodamia	Hippodamia convergens	Hippodamia convergens	predator	Chewing	na	natural population of variable ages	adult	Chronic toxicology	Manhattan, Kansas
1606	88	Al-Deeb & Wilde	2003	Environmental Entomology 32(5): 1164-1170	Effect of Bt corn expressing the Cry3Bb1 toxin for corn rootworm control on aboveground nontarget arthropods	Academic	Department of Entomology, Kansas State University	na	na	yes	United States	North America	yes	1	Field	Table 3	no	na	maize	Cry3Bb	Coleoptera	MON863	not specified	not specified	silk stage	61.5	30-93	cited from EPA document	na	na	na	na	no	na	na	Arthropoda	Insecta	Coleoptera	Carabidae	not specified	not specified	Carabidae	mixed	Chewing	na	natural population of variable ages	not specified	Chronic toxicology	Manhattan, Kansas
1607	88	Al-Deeb & Wilde	2003	Environmental Entomology 32(5): 1164-1170	Effect of Bt corn expressing the Cry3Bb1 toxin for corn rootworm control on aboveground nontarget arthropods	Academic	Department of Entomology, Kansas State University	na	na	yes	United States	North America	yes	1	Field	Table 3	no	na	maize	Cry3Bb	Coleoptera	MON863	not specified	not specified	silk stage	61.5	30-93	cited from EPA document	na	na	na	na	no	na	na	Arthropoda	Insecta	Coleoptera	Elateridae	not specified	not specified	Elateridae	omnivore	Chewing	na	natural population of variable ages	not specified	Chronic toxicology	Manhattan, Kansas
1608	88	Al-Deeb & Wilde	2003	Environmental Entomology 32(5): 1164-1170	Effect of Bt corn expressing the Cry3Bb1 toxin for corn rootworm control on aboveground nontarget arthropods	Academic	Department of Entomology, Kansas State University	na	na	yes	United States	North America	yes	1	Field	Table 3	no	na	maize	Cry3Bb	Coleoptera	MON863	not specified	not specified	silk stage	61.5	30-93	cited from EPA document	na	na	na	na	no	na	na	Arthropoda	Insecta	Coleoptera	Staphylinidae	not specified	not specified	Staphylinidae	predator	Chewing	na	natural population of variable ages	not specified	Chronic toxicology	Manhattan, Kansas
1609	88	Al-Deeb & Wilde	2003	Environmental Entomology 32(5): 1164-1170	Effect of Bt corn expressing the Cry3Bb1 toxin for corn rootworm control on aboveground nontarget arthropods	Academic	Department of Entomology, Kansas State University	na	na	yes	United States	North America	yes	1	Field	Table 3	no	na	maize	Cry3Bb	Coleoptera	MON863	not specified	not specified	silk stage	61.5	30-93	cited from EPA document	na	na	na	na	no	na	na	Arthropoda	Insecta	Collembola	not specified	not specified	not specified	Collembola	detritivore	Chewing	na	natural population of variable ages	not specified	Chronic toxicology	Manhattan, Kansas
1610	88	Al-Deeb & Wilde	2003	Environmental Entomology 32(5): 1164-1170	Effect of Bt corn expressing the Cry3Bb1 toxin for corn rootworm control on aboveground nontarget arthropods	Academic	Department of Entomology, Kansas State University	na	na	yes	United States	North America	yes	1	Field	Table 3	no	na	maize	Cry3Bb	Coleoptera	MON863	not specified	not specified	silk stage	61.5	30-93	cited from EPA document	na	na	na	na	no	na	na	Arthropoda	Insecta	Hymenoptera	Formicidae	not specified	not specified	Formicidae	omnivore	Mandibulate-sucking	na	natural population of variable ages	not specified	Chronic toxicology	Manhattan, Kansas
1611	88	Al-Deeb & Wilde	2003	Environmental Entomology 32(5): 1164-1170	Effect of Bt corn expressing the Cry3Bb1 toxin for corn rootworm control on aboveground nontarget arthropods	Academic	Department of Entomology, Kansas State University	na	na	yes	United States	North America	yes	1	Field	Table 3	no	na	maize	Cry3Bb	Coleoptera	MON863	not specified	not specified	silk stage	61.5	30-93	cited from EPA document	na	na	na	na	no	na	na	Arthropoda	Insecta	Orthoptera	Gryllidae	not specified	not specified	Gryllidae	omnivore	Chewing	na	natural population of variable ages	not specified	Chronic toxicology	Manhattan, Kansas
1612	88	Al-Deeb & Wilde	2003	Environmental Entomology 32(5): 1164-1170	Effect of Bt corn expressing the Cry3Bb1 toxin for corn rootworm control on aboveground nontarget arthropods	Academic	Department of Entomology, Kansas State University	na	na	yes	United States	North America	yes	1	Field	Table 3	no	na	maize	Cry3Bb	Coleoptera	MON863	not specified	not specified	silk stage	61.5	30-93	cited from EPA document	na	na	na	na	no	na	na	Arthropoda	Arachnida	Araneae	not specified	not specified	not specified	Araneae	predator	Piercing	na	natural population of variable ages	not specified	Chronic toxicology	Manhattan, Kansas
1613	88	Al-Deeb & Wilde	2003	Environmental Entomology 32(5): 1164-1170	Effect of Bt corn expressing the Cry3Bb1 toxin for corn rootworm control on aboveground nontarget arthropods	Academic	Department of Entomology, Kansas State University	na	na	yes	United States	North America	yes	2a	Field	Table 1	no	na	maize	Cry3Bb	Coleoptera	MON853	not specified	not specified	silk stage	not specified	na	na	na	na	na	na	no	na	na	Arthropoda	Insecta	Hemiptera	Anthocoridae	Orius	Orius insidiosus	Orius insidiosus	predator	Piercing	CMUE	natural population of variable ages	adult	Chronic toxicology	Pratt & Sedgwick, Kansas
1614	88	Al-Deeb & Wilde	2003	Environmental Entomology 32(5): 1164-1170	Effect of Bt corn expressing the Cry3Bb1 toxin for corn rootworm control on aboveground nontarget arthropods	Academic	Department of Entomology, Kansas State University	na	na	yes	United States	North America	yes	2a	Field	Table 1	no	na	maize	Cry3Bb	Coleoptera	MON853	not specified	not specified	silk stage	not specified	na	na	na	na	na	na	no	na	na	Arthropoda	Insecta	Hemiptera	Anthocoridae	Orius	Orius insidiosus	Orius insidiosus	predator	Piercing	CMUE	natural population of variable ages	nymph	Chronic toxicology	Pratt & Sedgwick, Kansas
1615	88	Al-Deeb & Wilde	2003	Environmental Entomology 32(5): 1164-1170	Effect of Bt corn expressing the Cry3Bb1 toxin for corn rootworm control on aboveground nontarget arthropods	Academic	Department of Entomology, Kansas State University	na	na	yes	United States	North America	yes	2a	Field	Table 1	no	na	maize	Cry3Bb	Coleoptera	MON853	not specified	not specified	silk stage	not specified	na	na	na	na	na	na	no	na	na	Arthropoda	Insecta	Coleoptera	Coccinellidae	Hippodamia	Hippodamia convergens	Hippodamia convergens	predator	Chewing	CMUE	natural population of variable ages	adult	Chronic toxicology	Pratt & Sedgwick, Kansas
1616	88	Al-Deeb & Wilde	2003	Environmental Entomology 32(5): 1164-1170	Effect of Bt corn expressing the Cry3Bb1 toxin for corn rootworm control on aboveground nontarget arthropods	Academic	Department of Entomology, Kansas State University	na	na	yes	United States	North America	yes	2a	Field	Table 1	no	na	maize	Cry3Bb	Coleoptera	MON853	not specified	not specified	silk stage	not specified	na	na	na	na	na	na	no	na	na	Arthropoda	Insecta	Coleoptera	Coccinellidae	Scymnus	not specified	Scymnus	predator	Chewing	CMUE	natural population of variable ages	adult	Chronic toxicology	Pratt & Sedgwick, Kansas
1617	88	Al-Deeb & Wilde	2003	Environmental Entomology 32(5): 1164-1170	Effect of Bt corn expressing the Cry3Bb1 toxin for corn rootworm control on aboveground nontarget arthropods	Academic	Department of Entomology, Kansas State University	na	na	yes	United States	North America	yes	2b	Field	Table 1	no	na	maize	Cry3Bb	Coleoptera	MON863	not specified	not specified	silk stage	61.5	30-93	cited from EPA document	na	na	na	na	no	na	na	Arthropoda	Insecta	Hemiptera	Anthocoridae	Orius	Orius insidiosus	Orius insidiosus	predator	Piercing	CMUE	natural population of variable ages	adult	Chronic toxicology	Pratt & Sedgwick, Kansas
1618	88	Al-Deeb & Wilde	2003	Environmental Entomology 32(5): 1164-1170	Effect of Bt corn expressing the Cry3Bb1 toxin for corn rootworm control on aboveground nontarget arthropods	Academic	Department of Entomology, Kansas State University	na	na	yes	United States	North America	yes	2b	Field	Table 1	no	na	maize	Cry3Bb	Coleoptera	MON863	not specified	not specified	silk stage	61.5	30-93	cited from EPA document	na	na	na	na	no	na	na	Arthropoda	Insecta	Hemiptera	Anthocoridae	Orius	Orius insidiosus	Orius insidiosus	predator	Piercing	CMUE	natural population of variable ages	nymph	Chronic toxicology	Pratt & Sedgwick, Kansas
1619	88	Al-Deeb & Wilde	2003	Environmental Entomology 32(5): 1164-1170	Effect of Bt corn expressing the Cry3Bb1 toxin for corn rootworm control on aboveground nontarget arthropods	Academic	Department of Entomology, Kansas State University	na	na	yes	United States	North America	yes	2b	Field	Table 1	no	na	maize	Cry3Bb	Coleoptera	MON863	not specified	not specified	silk stage	61.5	30-93	cited from EPA document	na	na	na	na	no	na	na	Arthropoda	Insecta	Coleoptera	Coccinellidae	Hippodamia	Hippodamia convergens	Hippodamia convergens	predator	Chewing	CMUE	natural population of variable ages	adult	Chronic toxicology	Pratt & Sedgwick, Kansas
1620	88	Al-Deeb & Wilde	2003	Environmental Entomology 32(5): 1164-1170	Effect of Bt corn expressing the Cry3Bb1 toxin for corn rootworm control on aboveground nontarget arthropods	Academic	Department of Entomology, Kansas State University	na	na	yes	United States	North America	yes	2b	Field	Table 1	no	na	maize	Cry3Bb	Coleoptera	MON863	not specified	not specified	silk stage	61.5	30-93	cited from EPA document	na	na	na	na	no	na	na	Arthropoda	Insecta	Coleoptera	Coccinellidae	Scymnus	not specified	Scymnus	predator	Chewing	CMUE	natural population of variable ages	adult	Chronic toxicology	Pratt & Sedgwick, Kansas
1621	88	Al-Deeb & Wilde	2003	Environmental Entomology 32(5): 1164-1170	Effect of Bt corn expressing the Cry3Bb1 toxin for corn rootworm control on aboveground nontarget arthropods	Academic	Department of Entomology, Kansas State University	na	na	yes	United States	North America	yes	2c	Field	Table 1	no	na	maize	Cry3Bb	Coleoptera	MON853	not specified	not specified	silk stage	not specified	na	na	na	na	na	na	no	na	na	Arthropoda	Insecta	Hemiptera	Anthocoridae	Orius	Orius insidiosus	Orius insidiosus	predator	Piercing	CMUE	natural population of variable ages	adult	Chronic toxicology	Pratt & Sedgwick, Kansas
1622	88	Al-Deeb & Wilde	2003	Environmental Entomology 32(5): 1164-1170	Effect of Bt corn expressing the Cry3Bb1 toxin for corn rootworm control on aboveground nontarget arthropods	Academic	Department of Entomology, Kansas State University	na	na	yes	United States	North America	yes	2c	Field	Table 1	no	na	maize	Cry3Bb	Coleoptera	MON853	not specified	not specified	silk stage	not specified	na	na	na	na	na	na	no	na	na	Arthropoda	Insecta	Hemiptera	Anthocoridae	Orius	Orius insidiosus	Orius insidiosus	predator	Piercing	CMUE	natural population of variable ages	nymph	Chronic toxicology	Pratt & Sedgwick, Kansas
1623	88	Al-Deeb & Wilde	2003	Environmental Entomology 32(5): 1164-1170	Effect of Bt corn expressing the Cry3Bb1 toxin for corn rootworm control on aboveground nontarget arthropods	Academic	Department of Entomology, Kansas State University	na	na	yes	United States	North America	yes	2c	Field	Table 1	no	na	maize	Cry3Bb	Coleoptera	MON853	not specified	not specified	silk stage	not specified	na	na	na	na	na	na	no	na	na	Arthropoda	Insecta	Coleoptera	Coccinellidae	Hippodamia	Hippodamia convergens	Hippodamia convergens	predator	Chewing	CMUE	natural population of variable ages	adult	Chronic toxicology	Pratt & Sedgwick, Kansas
1624	88	Al-Deeb & Wilde	2003	Environmental Entomology 32(5): 1164-1170	Effect of Bt corn expressing the Cry3Bb1 toxin for corn rootworm control on aboveground nontarget arthropods	Academic	Department of Entomology, Kansas State University	na	na	yes	United States	North America	yes	2c	Field	Table 1	no	na	maize	Cry3Bb	Coleoptera	MON853	not specified	not specified	silk stage	not specified	na	na	na	na	na	na	no	na	na	Arthropoda	Insecta	Coleoptera	Coccinellidae	Scymnus	not specified	Scymnus	predator	Chewing	CMUE	natural population of variable ages	adult	Chronic toxicology	Pratt & Sedgwick, Kansas
1625	88	Al-Deeb & Wilde	2003	Environmental Entomology 32(5): 1164-1170	Effect of Bt corn expressing the Cry3Bb1 toxin for corn rootworm control on aboveground nontarget arthropods	Academic	Department of Entomology, Kansas State University	na	na	yes	United States	North America	yes	2d	Field	Table 1	no	na	maize	Cry3Bb	Coleoptera	MON863	not specified	not specified	silk stage	61.5	30-93	cited from EPA document	na	na	na	na	no	na	na	Arthropoda	Insecta	Hemiptera	Anthocoridae	Orius	Orius insidiosus	Orius insidiosus	predator	Piercing	CMUE	natural population of variable ages	adult	Chronic toxicology	Pratt & Sedgwick, Kansas
1626	88	Al-Deeb & Wilde	2003	Environmental Entomology 32(5): 1164-1170	Effect of Bt corn expressing the Cry3Bb1 toxin for corn rootworm control on aboveground nontarget arthropods	Academic	Department of Entomology, Kansas State University	na	na	yes	United States	North America	yes	2d	Field	Table 1	no	na	maize	Cry3Bb	Coleoptera	MON863	not specified	not specified	silk stage	61.5	30-93	cited from EPA document	na	na	na	na	no	na	na	Arthropoda	Insecta	Hemiptera	Anthocoridae	Orius	Orius insidiosus	Orius insidiosus	predator	Piercing	CMUE	natural population of variable ages	nymph	Chronic toxicology	Pratt & Sedgwick, Kansas
1627	88	Al-Deeb & Wilde	2003	Environmental Entomology 32(5): 1164-1170	Effect of Bt corn expressing the Cry3Bb1 toxin for corn rootworm control on aboveground nontarget arthropods	Academic	Department of Entomology, Kansas State University	na	na	yes	United States	North America	yes	2d	Field	Table 1	no	na	maize	Cry3Bb	Coleoptera	MON863	not specified	not specified	silk stage	61.5	30-93	cited from EPA document	na	na	na	na	no	na	na	Arthropoda	Insecta	Coleoptera	Coccinellidae	Hippodamia	Hippodamia convergens	Hippodamia convergens	predator	Chewing	CMUE	natural population of variable ages	adult	Chronic toxicology	Pratt & Sedgwick, Kansas
1628	88	Al-Deeb & Wilde	2003	Environmental Entomology 32(5): 1164-1170	Effect of Bt corn expressing the Cry3Bb1 toxin for corn rootworm control on aboveground nontarget arthropods	Academic	Department of Entomology, Kansas State University	na	na	yes	United States	North America	yes	2d	Field	Table 1	no	na	maize	Cry3Bb	Coleoptera	MON863	not specified	not specified	silk stage	61.5	30-93	cited from EPA document	na	na	na	na	no	na	na	Arthropoda	Insecta	Coleoptera	Coccinellidae	Scymnus	not specified	Scymnus	predator	Chewing	CMUE	natural population of variable ages	adult	Chronic toxicology	Pratt & Sedgwick, Kansas
1629	88	Al-Deeb & Wilde	2003	Environmental Entomology 32(5): 1164-1170	Effect of Bt corn expressing the Cry3Bb1 toxin for corn rootworm control on aboveground nontarget arthropods	Academic	Department of Entomology, Kansas State University	na	na	yes	United States	North America	yes	3a	Field	Table 1	no	na	maize	Cry3Bb	Coleoptera	MON853	not specified	not specified	silk stage	not specified	na	na	na	na	na	na	no	na	na	Arthropoda	Insecta	Hemiptera	Anthocoridae	Orius	Orius insidiosus	Orius insidiosus	predator	Piercing	CMUE	natural population of variable ages	adult	Chronic toxicology	Scandia, Kansas
1630	88	Al-Deeb & Wilde	2003	Environmental Entomology 32(5): 1164-1170	Effect of Bt corn expressing the Cry3Bb1 toxin for corn rootworm control on aboveground nontarget arthropods	Academic	Department of Entomology, Kansas State University	na	na	yes	United States	North America	yes	3a	Field	Table 1	no	na	maize	Cry3Bb	Coleoptera	MON853	not specified	not specified	silk stage	not specified	na	na	na	na	na	na	no	na	na	Arthropoda	Insecta	Hemiptera	Anthocoridae	Orius	Orius insidiosus	Orius insidiosus	predator	Piercing	CMUE	natural population of variable ages	nymph	Chronic toxicology	Scandia, Kansas
1631	88	Al-Deeb & Wilde	2003	Environmental Entomology 32(5): 1164-1170	Effect of Bt corn expressing the Cry3Bb1 toxin for corn rootworm control on aboveground nontarget arthropods	Academic	Department of Entomology, Kansas State University	na	na	yes	United States	North America	yes	3b	Field	Table 1	no	na	maize	Cry3Bb	Coleoptera	MON862	not specified	not specified	silk stage	not specified	na	na	na	na	na	na	no	na	na	Arthropoda	Insecta	Hemiptera	Anthocoridae	Orius	Orius insidiosus	Orius insidiosus	predator	Piercing	EMUE & CMUE	natural population of variable ages	adult	Chronic toxicology	Scandia, Kansas
1632	88	Al-Deeb & Wilde	2003	Environmental Entomology 32(5): 1164-1170	Effect of Bt corn expressing the Cry3Bb1 toxin for corn rootworm control on aboveground nontarget arthropods	Academic	Department of Entomology, Kansas State University	na	na	yes	United States	North America	yes	3b	Field	Table 1	no	na	maize	Cry3Bb	Coleoptera	MON862	not specified	not specified	silk stage	not specified	na	na	na	na	na	na	no	na	na	Arthropoda	Insecta	Hemiptera	Anthocoridae	Orius	Orius insidiosus	Orius insidiosus	predator	Piercing	EMUE & CMUE	natural population of variable ages	nymph	Chronic toxicology	Scandia, Kansas
1633	88	Al-Deeb & Wilde	2003	Environmental Entomology 32(5): 1164-1170	Effect of Bt corn expressing the Cry3Bb1 toxin for corn rootworm control on aboveground nontarget arthropods	Academic	Department of Entomology, Kansas State University	na	na	yes	United States	North America	yes	3c	Field	Table 1	no	na	maize	Cry3Bb	Coleoptera	MON862	not specified	not specified	silk stage	not specified	na	na	na	na	na	na	no	na	na	Arthropoda	Insecta	Hemiptera	Anthocoridae	Orius	Orius insidiosus	Orius insidiosus	predator	Piercing	EMUE & CMUE	natural population of variable ages	adult	Chronic toxicology	Scandia, Kansas
1634	88	Al-Deeb & Wilde	2003	Environmental Entomology 32(5): 1164-1170	Effect of Bt corn expressing the Cry3Bb1 toxin for corn rootworm control on aboveground nontarget arthropods	Academic	Department of Entomology, Kansas State University	na	na	yes	United States	North America	yes	3c	Field	Table 1	no	na	maize	Cry3Bb	Coleoptera	MON862	not specified	not specified	silk stage	not specified	na	na	na	na	na	na	no	na	na	Arthropoda	Insecta	Hemiptera	Anthocoridae	Orius	Orius insidiosus	Orius insidiosus	predator	Piercing	EMUE & CMUE	natural population of variable ages	nymph	Chronic toxicology	Scandia, Kansas
1635	88	Al-Deeb & Wilde	2003	Environmental Entomology 32(5): 1164-1170	Effect of Bt corn expressing the Cry3Bb1 toxin for corn rootworm control on aboveground nontarget arthropods	Academic	Department of Entomology, Kansas State University	na	na	yes	United States	North America	yes	3d	Field	Table 1	no	na	maize	Cry3Bb	Coleoptera	MON862	not specified	not specified	silk stage	not specified	na	na	na	na	na	na	no	na	na	Arthropoda	Insecta	Hemiptera	Anthocoridae	Orius	Orius insidiosus	Orius insidiosus	predator	Piercing	EMUE & CMUE	natural population of variable ages	adult	Chronic toxicology	Scandia, Kansas
1636	88	Al-Deeb & Wilde	2003	Environmental Entomology 32(5): 1164-1170	Effect of Bt corn expressing the Cry3Bb1 toxin for corn rootworm control on aboveground nontarget arthropods	Academic	Department of Entomology, Kansas State University	na	na	yes	United States	North America	yes	3d	Field	Table 1	no	na	maize	Cry3Bb	Coleoptera	MON862	not specified	not specified	silk stage	not specified	na	na	na	na	na	na	no	na	na	Arthropoda	Insecta	Hemiptera	Anthocoridae	Orius	Orius insidiosus	Orius insidiosus	predator	Piercing	EMUE & CMUE	natural population of variable ages	nymph	Chronic toxicology	Scandia, Kansas
1637	88	Al-Deeb & Wilde	2003	Environmental Entomology 32(5): 1164-1170	Effect of Bt corn expressing the Cry3Bb1 toxin for corn rootworm control on aboveground nontarget arthropods	Academic	Department of Entomology, Kansas State University	na	na	yes	United States	North America	yes	3d	Field	Table 3	no	na	maize	Cry3Bb	Coleoptera	MON862	not specified	not specified	silk stage	not specified	na	na	na	na	na	na	no	na	na	Arthropoda	Insecta	Coleoptera	Carabidae	not specified	not specified	Carabidae	mixed	Chewing	CMUE	natural population of variable ages	not specified	Chronic toxicology	Scandia, Kansas
1638	88	Al-Deeb & Wilde	2003	Environmental Entomology 32(5): 1164-1170	Effect of Bt corn expressing the Cry3Bb1 toxin for corn rootworm control on aboveground nontarget arthropods	Academic	Department of Entomology, Kansas State University	na	na	yes	United States	North America	yes	3d	Field	Table 3	no	na	maize	Cry3Bb	Coleoptera	MON862	not specified	not specified	silk stage	not specified	na	na	na	na	na	na	no	na	na	Arthropoda	Insecta	Coleoptera	Elateridae	not specified	not specified	Elateridae	omnivore	Chewing	CMUE	natural population of variable ages	not specified	Chronic toxicology	Scandia, Kansas
1639	88	Al-Deeb & Wilde	2003	Environmental Entomology 32(5): 1164-1170	Effect of Bt corn expressing the Cry3Bb1 toxin for corn rootworm control on aboveground nontarget arthropods	Academic	Department of Entomology, Kansas State University	na	na	yes	United States	North America	yes	3d	Field	Table 3	no	na	maize	Cry3Bb	Coleoptera	MON862	not specified	not specified	silk stage	not specified	na	na	na	na	na	na	no	na	na	Arthropoda	Insecta	Coleoptera	Staphylinidae	not specified	not specified	Staphylinidae	predator	Chewing	CMUE	natural population of variable ages	not specified	Chronic toxicology	Scandia, Kansas
1640	88	Al-Deeb & Wilde	2003	Environmental Entomology 32(5): 1164-1170	Effect of Bt corn expressing the Cry3Bb1 toxin for corn rootworm control on aboveground nontarget arthropods	Academic	Department of Entomology, Kansas State University	na	na	yes	United States	North America	yes	3d	Field	Table 3	no	na	maize	Cry3Bb	Coleoptera	MON862	not specified	not specified	silk stage	not specified	na	na	na	na	na	na	no	na	na	Arthropoda	Insecta	Collembola	not specified	not specified	not specified	Collembola	detritivore	Chewing	CMUE	natural population of variable ages	not specified	Chronic toxicology	Scandia, Kansas
1641	88	Al-Deeb & Wilde	2003	Environmental Entomology 32(5): 1164-1170	Effect of Bt corn expressing the Cry3Bb1 toxin for corn rootworm control on aboveground nontarget arthropods	Academic	Department of Entomology, Kansas State University	na	na	yes	United States	North America	yes	3d	Field	Table 3	no	na	maize	Cry3Bb	Coleoptera	MON862	not specified	not specified	silk stage	not specified	na	na	na	na	na	na	no	na	na	Arthropoda	Insecta	Hymenoptera	Formicidae	not specified	not specified	Formicidae	omnivore	Mandibulate-sucking	CMUE	natural population of variable ages	not specified	Chronic toxicology	Scandia, Kansas
1642	88	Al-Deeb & Wilde	2003	Environmental Entomology 32(5): 1164-1170	Effect of Bt corn expressing the Cry3Bb1 toxin for corn rootworm control on aboveground nontarget arthropods	Academic	Department of Entomology, Kansas State University	na	na	yes	United States	North America	yes	3d	Field	Table 3	no	na	maize	Cry3Bb	Coleoptera	MON862	not specified	not specified	silk stage	not specified	na	na	na	na	na	na	no	na	na	Arthropoda	Arachnida	Araneae	not specified	not specified	not specified	Araneae	predator	Piercing	CMUE	natural population of variable ages	not specified	Chronic toxicology	Scandia, Kansas
1643	88	Al-Deeb & Wilde	2003	Environmental Entomology 32(5): 1164-1170	Effect of Bt corn expressing the Cry3Bb1 toxin for corn rootworm control on aboveground nontarget arthropods	Academic	Department of Entomology, Kansas State University	na	na	yes	United States	North America	yes	3e	Field	Table 1	no	na	maize	Cry3Bb	Coleoptera	MON862	not specified	not specified	silk stage	not specified	na	na	na	na	na	na	no	na	na	Arthropoda	Insecta	Hemiptera	Anthocoridae	Orius	Orius insidiosus	Orius insidiosus	predator	Piercing	CMUE	natural population of variable ages	adult	Chronic toxicology	Scandia, Kansas
1644	88	Al-Deeb & Wilde	2003	Environmental Entomology 32(5): 1164-1170	Effect of Bt corn expressing the Cry3Bb1 toxin for corn rootworm control on aboveground nontarget arthropods	Academic	Department of Entomology, Kansas State University	na	na	yes	United States	North America	yes	3e	Field	Table 1	no	na	maize	Cry3Bb	Coleoptera	MON862	not specified	not specified	silk stage	not specified	na	na	na	na	na	na	no	na	na	Arthropoda	Insecta	Hemiptera	Anthocoridae	Orius	Orius insidiosus	Orius insidiosus	predator	Piercing	CMUE	natural population of variable ages	nymph	Chronic toxicology	Scandia, Kansas
1645	88	Al-Deeb & Wilde	2003	Environmental Entomology 32(5): 1164-1170	Effect of Bt corn expressing the Cry3Bb1 toxin for corn rootworm control on aboveground nontarget arthropods	Academic	Department of Entomology, Kansas State University	na	na	yes	United States	North America	yes	3e	Field	Table 3	no	na	maize	Cry3Bb	Coleoptera	MON862	not specified	not specified	silk stage	not specified	na	na	na	na	na	na	no	na	na	Arthropoda	Insecta	Coleoptera	Carabidae	not specified	not specified	Carabidae	mixed	Chewing	CMUE	natural population of variable ages	not specified	Chronic toxicology	Scandia, Kansas
1646	88	Al-Deeb & Wilde	2003	Environmental Entomology 32(5): 1164-1170	Effect of Bt corn expressing the Cry3Bb1 toxin for corn rootworm control on aboveground nontarget arthropods	Academic	Department of Entomology, Kansas State University	na	na	yes	United States	North America	yes	3e	Field	Table 3	no	na	maize	Cry3Bb	Coleoptera	MON862	not specified	not specified	silk stage	not specified	na	na	na	na	na	na	no	na	na	Arthropoda	Insecta	Coleoptera	Elateridae	not specified	not specified	Elateridae	omnivore	Chewing	CMUE	natural population of variable ages	not specified	Chronic toxicology	Scandia, Kansas
1647	88	Al-Deeb & Wilde	2003	Environmental Entomology 32(5): 1164-1170	Effect of Bt corn expressing the Cry3Bb1 toxin for corn rootworm control on aboveground nontarget arthropods	Academic	Department of Entomology, Kansas State University	na	na	yes	United States	North America	yes	3e	Field	Table 3	no	na	maize	Cry3Bb	Coleoptera	MON862	not specified	not specified	silk stage	not specified	na	na	na	na	na	na	no	na	na	Arthropoda	Insecta	Coleoptera	Staphylinidae	not specified	not specified	Staphylinidae	predator	Chewing	CMUE	natural population of variable ages	not specified	Chronic toxicology	Scandia, Kansas
1648	88	Al-Deeb & Wilde	2003	Environmental Entomology 32(5): 1164-1170	Effect of Bt corn expressing the Cry3Bb1 toxin for corn rootworm control on aboveground nontarget arthropods	Academic	Department of Entomology, Kansas State University	na	na	yes	United States	North America	yes	3e	Field	Table 3	no	na	maize	Cry3Bb	Coleoptera	MON862	not specified	not specified	silk stage	not specified	na	na	na	na	na	na	no	na	na	Arthropoda	Insecta	Collembola	not specified	not specified	not specified	Collembola	detritivore	Chewing	CMUE	natural population of variable ages	not specified	Chronic toxicology	Scandia, Kansas
1649	88	Al-Deeb & Wilde	2003	Environmental Entomology 32(5): 1164-1170	Effect of Bt corn expressing the Cry3Bb1 toxin for corn rootworm control on aboveground nontarget arthropods	Academic	Department of Entomology, Kansas State University	na	na	yes	United States	North America	yes	3e	Field	Table 3	no	na	maize	Cry3Bb	Coleoptera	MON862	not specified	not specified	silk stage	not specified	na	na	na	na	na	na	no	na	na	Arthropoda	Insecta	Hymenoptera	Formicidae	not specified	not specified	Formicidae	omnivore	Mandibulate-sucking	CMUE	natural population of variable ages	not specified	Chronic toxicology	Scandia, Kansas
1650	88	Al-Deeb & Wilde	2003	Environmental Entomology 32(5): 1164-1170	Effect of Bt corn expressing the Cry3Bb1 toxin for corn rootworm control on aboveground nontarget arthropods	Academic	Department of Entomology, Kansas State University	na	na	yes	United States	North America	yes	3e	Field	Table 3	no	na	maize	Cry3Bb	Coleoptera	MON862	not specified	not specified	silk stage	not specified	na	na	na	na	na	na	no	na	na	Arthropoda	Arachnida	Araneae	not specified	not specified	not specified	Araneae	predator	Piercing	CMUE	natural population of variable ages	not specified	Chronic toxicology	Scandia, Kansas
1651	88	Al-Deeb & Wilde	2003	Environmental Entomology 32(5): 1164-1170	Effect of Bt corn expressing the Cry3Bb1 toxin for corn rootworm control on aboveground nontarget arthropods	Academic	Department of Entomology, Kansas State University	na	na	yes	United States	North America	yes	3f	Field	Table 1	no	na	maize	Cry3Bb	Coleoptera	MON862	not specified	not specified	silk stage	not specified	na	na	na	na	na	na	no	na	na	Arthropoda	Insecta	Hemiptera	Anthocoridae	Orius	Orius insidiosus	Orius insidiosus	predator	Piercing	CMUE	natural population of variable ages	adult	Chronic toxicology	Scandia, Kansas
1652	88	Al-Deeb & Wilde	2003	Environmental Entomology 32(5): 1164-1170	Effect of Bt corn expressing the Cry3Bb1 toxin for corn rootworm control on aboveground nontarget arthropods	Academic	Department of Entomology, Kansas State University	na	na	yes	United States	North America	yes	3f	Field	Table 1	no	na	maize	Cry3Bb	Coleoptera	MON862	not specified	not specified	silk stage	not specified	na	na	na	na	na	na	no	na	na	Arthropoda	Insecta	Hemiptera	Anthocoridae	Orius	Orius insidiosus	Orius insidiosus	predator	Piercing	CMUE	natural population of variable ages	nymph	Chronic toxicology	Scandia, Kansas
1653	88	Al-Deeb & Wilde	2003	Environmental Entomology 32(5): 1164-1170	Effect of Bt corn expressing the Cry3Bb1 toxin for corn rootworm control on aboveground nontarget arthropods	Academic	Department of Entomology, Kansas State University	na	na	yes	United States	North America	yes	3g	Field	Table 1	no	na	maize	Cry3Bb	Coleoptera	MON863	not specified	not specified	silk stage	61.5	30-93	cited from EPA document	na	na	na	na	no	na	na	Arthropoda	Insecta	Hemiptera	Anthocoridae	Orius	Orius insidiosus	Orius insidiosus	predator	Piercing	EMUE & CMUE	natural population of variable ages	adult	Chronic toxicology	Scandia, Kansas
1654	88	Al-Deeb & Wilde	2003	Environmental Entomology 32(5): 1164-1170	Effect of Bt corn expressing the Cry3Bb1 toxin for corn rootworm control on aboveground nontarget arthropods	Academic	Department of Entomology, Kansas State University	na	na	yes	United States	North America	yes	3g	Field	Table 1	no	na	maize	Cry3Bb	Coleoptera	MON863	not specified	not specified	silk stage	61.5	30-93	cited from EPA document	na	na	na	na	no	na	na	Arthropoda	Insecta	Hemiptera	Anthocoridae	Orius	Orius insidiosus	Orius insidiosus	predator	Piercing	EMUE & CMUE	natural population of variable ages	nymph	Chronic toxicology	Scandia, Kansas
1655	88	Al-Deeb & Wilde	2003	Environmental Entomology 32(5): 1164-1170	Effect of Bt corn expressing the Cry3Bb1 toxin for corn rootworm control on aboveground nontarget arthropods	Academic	Department of Entomology, Kansas State University	na	na	yes	United States	North America	yes	3h	Field	Table 1	no	na	maize	Cry3Bb	Coleoptera	MON863	not specified	not specified	silk stage	61.5	30-93	cited from EPA document	na	na	na	na	no	na	na	Arthropoda	Insecta	Hemiptera	Anthocoridae	Orius	Orius insidiosus	Orius insidiosus	predator	Piercing	EMUE & CMUE	natural population of variable ages	adult	Chronic toxicology	Scandia, Kansas
1656	88	Al-Deeb & Wilde	2003	Environmental Entomology 32(5): 1164-1170	Effect of Bt corn expressing the Cry3Bb1 toxin for corn rootworm control on aboveground nontarget arthropods	Academic	Department of Entomology, Kansas State University	na	na	yes	United States	North America	yes	3h	Field	Table 1	no	na	maize	Cry3Bb	Coleoptera	MON863	not specified	not specified	silk stage	61.5	30-93	cited from EPA document	na	na	na	na	no	na	na	Arthropoda	Insecta	Hemiptera	Anthocoridae	Orius	Orius insidiosus	Orius insidiosus	predator	Piercing	EMUE & CMUE	natural population of variable ages	nymph	Chronic toxicology	Scandia, Kansas
1657	88	Al-Deeb & Wilde	2003	Environmental Entomology 32(5): 1164-1170	Effect of Bt corn expressing the Cry3Bb1 toxin for corn rootworm control on aboveground nontarget arthropods	Academic	Department of Entomology, Kansas State University	na	na	yes	United States	North America	yes	3i	Field	Table 1	no	na	maize	Cry3Bb	Coleoptera	MON863	not specified	not specified	silk stage	61.5	30-93	cited from EPA document	na	na	na	na	no	na	na	Arthropoda	Insecta	Hemiptera	Anthocoridae	Orius	Orius insidiosus	Orius insidiosus	predator	Piercing	EMUE & CMUE	natural population of variable ages	adult	Chronic toxicology	Scandia, Kansas
1658	88	Al-Deeb & Wilde	2003	Environmental Entomology 32(5): 1164-1170	Effect of Bt corn expressing the Cry3Bb1 toxin for corn rootworm control on aboveground nontarget arthropods	Academic	Department of Entomology, Kansas State University	na	na	yes	United States	North America	yes	3i	Field	Table 1	no	na	maize	Cry3Bb	Coleoptera	MON863	not specified	not specified	silk stage	61.5	30-93	cited from EPA document	na	na	na	na	no	na	na	Arthropoda	Insecta	Hemiptera	Anthocoridae	Orius	Orius insidiosus	Orius insidiosus	predator	Piercing	EMUE & CMUE	natural population of variable ages	nymph	Chronic toxicology	Scandia, Kansas
1659	88	Al-Deeb & Wilde	2003	Environmental Entomology 32(5): 1164-1170	Effect of Bt corn expressing the Cry3Bb1 toxin for corn rootworm control on aboveground nontarget arthropods	Academic	Department of Entomology, Kansas State University	na	na	yes	United States	North America	yes	3i	Field	Table 3	no	na	maize	Cry3Bb	Coleoptera	MON863	not specified	not specified	silk stage	61.5	30-93	cited from EPA document	na	na	na	na	no	na	na	Arthropoda	Insecta	Coleoptera	Carabidae	not specified	not specified	Carabidae	mixed	Chewing	CMUE	natural population of variable ages	not specified	Chronic toxicology	Scandia, Kansas
1660	88	Al-Deeb & Wilde	2003	Environmental Entomology 32(5): 1164-1170	Effect of Bt corn expressing the Cry3Bb1 toxin for corn rootworm control on aboveground nontarget arthropods	Academic	Department of Entomology, Kansas State University	na	na	yes	United States	North America	yes	3i	Field	Table 3	no	na	maize	Cry3Bb	Coleoptera	MON863	not specified	not specified	silk stage	61.5	30-93	cited from EPA document	na	na	na	na	no	na	na	Arthropoda	Insecta	Coleoptera	Elateridae	not specified	not specified	Elateridae	omnivore	Chewing	CMUE	natural population of variable ages	not specified	Chronic toxicology	Scandia, Kansas
1661	88	Al-Deeb & Wilde	2003	Environmental Entomology 32(5): 1164-1170	Effect of Bt corn expressing the Cry3Bb1 toxin for corn rootworm control on aboveground nontarget arthropods	Academic	Department of Entomology, Kansas State University	na	na	yes	United States	North America	yes	3i	Field	Table 3	no	na	maize	Cry3Bb	Coleoptera	MON863	not specified	not specified	silk stage	61.5	30-93	cited from EPA document	na	na	na	na	no	na	na	Arthropoda	Insecta	Coleoptera	Staphylinidae	not specified	not specified	Staphylinidae	predator	Chewing	CMUE	natural population of variable ages	not specified	Chronic toxicology	Scandia, Kansas
1662	88	Al-Deeb & Wilde	2003	Environmental Entomology 32(5): 1164-1170	Effect of Bt corn expressing the Cry3Bb1 toxin for corn rootworm control on aboveground nontarget arthropods	Academic	Department of Entomology, Kansas State University	na	na	yes	United States	North America	yes	3i	Field	Table 3	no	na	maize	Cry3Bb	Coleoptera	MON863	not specified	not specified	silk stage	61.5	30-93	cited from EPA document	na	na	na	na	no	na	na	Arthropoda	Insecta	Collembola	not specified	not specified	not specified	Collembola	detritivore	Chewing	CMUE	natural population of variable ages	not specified	Chronic toxicology	Scandia, Kansas
1663	88	Al-Deeb & Wilde	2003	Environmental Entomology 32(5): 1164-1170	Effect of Bt corn expressing the Cry3Bb1 toxin for corn rootworm control on aboveground nontarget arthropods	Academic	Department of Entomology, Kansas State University	na	na	yes	United States	North America	yes	3i	Field	Table 3	no	na	maize	Cry3Bb	Coleoptera	MON863	not specified	not specified	silk stage	61.5	30-93	cited from EPA document	na	na	na	na	no	na	na	Arthropoda	Insecta	Hymenoptera	Formicidae	not specified	not specified	Formicidae	omnivore	Mandibulate-sucking	CMUE	natural population of variable ages	not specified	Chronic toxicology	Scandia, Kansas
1664	88	Al-Deeb & Wilde	2003	Environmental Entomology 32(5): 1164-1170	Effect of Bt corn expressing the Cry3Bb1 toxin for corn rootworm control on aboveground nontarget arthropods	Academic	Department of Entomology, Kansas State University	na	na	yes	United States	North America	yes	3i	Field	Table 3	no	na	maize	Cry3Bb	Coleoptera	MON863	not specified	not specified	silk stage	61.5	30-93	cited from EPA document	na	na	na	na	no	na	na	Arthropoda	Arachnida	Araneae	not specified	not specified	not specified	Araneae	predator	Piercing	CMUE	natural population of variable ages	not specified	Chronic toxicology	Scandia, Kansas
1665	88	Al-Deeb & Wilde	2003	Environmental Entomology 32(5): 1164-1170	Effect of Bt corn expressing the Cry3Bb1 toxin for corn rootworm control on aboveground nontarget arthropods	Academic	Department of Entomology, Kansas State University	na	na	yes	United States	North America	yes	3j	Field	Table 1	no	na	maize	Cry3Bb	Coleoptera	MON863	not specified	not specified	silk stage	61.5	30-93	cited from EPA document	na	na	na	na	no	na	na	Arthropoda	Insecta	Hemiptera	Anthocoridae	Orius	Orius insidiosus	Orius insidiosus	predator	Piercing	CMUE	natural population of variable ages	adult	Chronic toxicology	Scandia, Kansas
1666	88	Al-Deeb & Wilde	2003	Environmental Entomology 32(5): 1164-1170	Effect of Bt corn expressing the Cry3Bb1 toxin for corn rootworm control on aboveground nontarget arthropods	Academic	Department of Entomology, Kansas State University	na	na	yes	United States	North America	yes	3j	Field	Table 1	no	na	maize	Cry3Bb	Coleoptera	MON863	not specified	not specified	silk stage	61.5	30-93	cited from EPA document	na	na	na	na	no	na	na	Arthropoda	Insecta	Hemiptera	Anthocoridae	Orius	Orius insidiosus	Orius insidiosus	predator	Piercing	CMUE	natural population of variable ages	nymph	Chronic toxicology	Scandia, Kansas
1667	88	Al-Deeb & Wilde	2003	Environmental Entomology 32(5): 1164-1170	Effect of Bt corn expressing the Cry3Bb1 toxin for corn rootworm control on aboveground nontarget arthropods	Academic	Department of Entomology, Kansas State University	na	na	yes	United States	North America	yes	3j	Field	Table 3	no	na	maize	Cry3Bb	Coleoptera	MON863	not specified	not specified	silk stage	61.5	30-93	cited from EPA document	na	na	na	na	no	na	na	Arthropoda	Insecta	Coleoptera	Carabidae	not specified	not specified	Carabidae	mixed	Chewing	CMUE	natural population of variable ages	not specified	Chronic toxicology	Scandia, Kansas
1668	88	Al-Deeb & Wilde	2003	Environmental Entomology 32(5): 1164-1170	Effect of Bt corn expressing the Cry3Bb1 toxin for corn rootworm control on aboveground nontarget arthropods	Academic	Department of Entomology, Kansas State University	na	na	yes	United States	North America	yes	3j	Field	Table 3	no	na	maize	Cry3Bb	Coleoptera	MON863	not specified	not specified	silk stage	61.5	30-93	cited from EPA document	na	na	na	na	no	na	na	Arthropoda	Insecta	Coleoptera	Elateridae	not specified	not specified	Elateridae	omnivore	Chewing	CMUE	natural population of variable ages	not specified	Chronic toxicology	Scandia, Kansas
1669	88	Al-Deeb & Wilde	2003	Environmental Entomology 32(5): 1164-1170	Effect of Bt corn expressing the Cry3Bb1 toxin for corn rootworm control on aboveground nontarget arthropods	Academic	Department of Entomology, Kansas State University	na	na	yes	United States	North America	yes	3j	Field	Table 3	no	na	maize	Cry3Bb	Coleoptera	MON863	not specified	not specified	silk stage	61.5	30-93	cited from EPA document	na	na	na	na	no	na	na	Arthropoda	Insecta	Coleoptera	Staphylinidae	not specified	not specified	Staphylinidae	predator	Chewing	CMUE	natural population of variable ages	not specified	Chronic toxicology	Scandia, Kansas
1670	88	Al-Deeb & Wilde	2003	Environmental Entomology 32(5): 1164-1170	Effect of Bt corn expressing the Cry3Bb1 toxin for corn rootworm control on aboveground nontarget arthropods	Academic	Department of Entomology, Kansas State University	na	na	yes	United States	North America	yes	3j	Field	Table 3	no	na	maize	Cry3Bb	Coleoptera	MON863	not specified	not specified	silk stage	61.5	30-93	cited from EPA document	na	na	na	na	no	na	na	Arthropoda	Insecta	Collembola	not specified	not specified	not specified	Collembola	detritivore	Chewing	CMUE	natural population of variable ages	not specified	Chronic toxicology	Scandia, Kansas
1671	88	Al-Deeb & Wilde	2003	Environmental Entomology 32(5): 1164-1170	Effect of Bt corn expressing the Cry3Bb1 toxin for corn rootworm control on aboveground nontarget arthropods	Academic	Department of Entomology, Kansas State University	na	na	yes	United States	North America	yes	3j	Field	Table 3	no	na	maize	Cry3Bb	Coleoptera	MON863	not specified	not specified	silk stage	61.5	30-93	cited from EPA document	na	na	na	na	no	na	na	Arthropoda	Insecta	Hymenoptera	Formicidae	not specified	not specified	Formicidae	omnivore	Mandibulate-sucking	CMUE	natural population of variable ages	not specified	Chronic toxicology	Scandia, Kansas
1672	88	Al-Deeb & Wilde	2003	Environmental Entomology 32(5): 1164-1170	Effect of Bt corn expressing the Cry3Bb1 toxin for corn rootworm control on aboveground nontarget arthropods	Academic	Department of Entomology, Kansas State University	na	na	yes	United States	North America	yes	3j	Field	Table 3	no	na	maize	Cry3Bb	Coleoptera	MON863	not specified	not specified	silk stage	61.5	30-93	cited from EPA document	na	na	na	na	no	na	na	Arthropoda	Arachnida	Araneae	not specified	not specified	not specified	Araneae	predator	Piercing	CMUE	natural population of variable ages	not specified	Chronic toxicology	Scandia, Kansas
1673	88	Al-Deeb & Wilde	2003	Environmental Entomology 32(5): 1164-1170	Effect of Bt corn expressing the Cry3Bb1 toxin for corn rootworm control on aboveground nontarget arthropods	Academic	Department of Entomology, Kansas State University	na	na	yes	United States	North America	yes	3k	Field	Table 1	no	na	maize	Cry3Bb	Coleoptera	MON863	not specified	not specified	silk stage	61.5	30-93	cited from EPA document	na	na	na	na	no	na	na	Arthropoda	Insecta	Hemiptera	Anthocoridae	Orius	Orius insidiosus	Orius insidiosus	predator	Piercing	CMUE	natural population of variable ages	adult	Chronic toxicology	Scandia, Kansas
1674	88	Al-Deeb & Wilde	2003	Environmental Entomology 32(5): 1164-1170	Effect of Bt corn expressing the Cry3Bb1 toxin for corn rootworm control on aboveground nontarget arthropods	Academic	Department of Entomology, Kansas State University	na	na	yes	United States	North America	yes	3k	Field	Table 1	no	na	maize	Cry3Bb	Coleoptera	MON863	not specified	not specified	silk stage	61.5	30-93	cited from EPA document	na	na	na	na	no	na	na	Arthropoda	Insecta	Hemiptera	Anthocoridae	Orius	Orius insidiosus	Orius insidiosus	predator	Piercing	CMUE	natural population of variable ages	nymph	Chronic toxicology	Scandia, Kansas
1675	88	Al-Deeb & Wilde	2003	Environmental Entomology 32(5): 1164-1170	Effect of Bt corn expressing the Cry3Bb1 toxin for corn rootworm control on aboveground nontarget arthropods	Academic	Department of Entomology, Kansas State University	na	na	yes	United States	North America	yes	4a	Field	Table 1	no	na	maize	Cry3Bb	Coleoptera	MON863	not specified	not specified	silk stage	61.5	30-93	cited from EPA document	na	na	na	na	no	na	na	Arthropoda	Insecta	Hemiptera	Anthocoridae	Orius	Orius insidiosus	Orius insidiosus	predator	Piercing	na	natural population of variable ages	adult	Chronic toxicology	Sublette, Kansas
1676	88	Al-Deeb & Wilde	2003	Environmental Entomology 32(5): 1164-1170	Effect of Bt corn expressing the Cry3Bb1 toxin for corn rootworm control on aboveground nontarget arthropods	Academic	Department of Entomology, Kansas State University	na	na	yes	United States	North America	yes	4a	Field	Table 1	no	na	maize	Cry3Bb	Coleoptera	MON863	not specified	not specified	silk stage	61.5	30-93	cited from EPA document	na	na	na	na	no	na	na	Arthropoda	Insecta	Hemiptera	Anthocoridae	Orius	Orius insidiosus	Orius insidiosus	predator	Piercing	na	natural population of variable ages	nymph	Chronic toxicology	Sublette, Kansas
1677	88	Al-Deeb & Wilde	2003	Environmental Entomology 32(5): 1164-1170	Effect of Bt corn expressing the Cry3Bb1 toxin for corn rootworm control on aboveground nontarget arthropods	Academic	Department of Entomology, Kansas State University	na	na	yes	United States	North America	yes	4a	Field	Table 3	no	na	maize	Cry3Bb	Coleoptera	MON863	not specified	not specified	silk stage	61.5	30-93	cited from EPA document	na	na	na	na	no	na	na	Arthropoda	Insecta	Coleoptera	Carabidae	not specified	not specified	Carabidae	mixed	Chewing	na	natural population of variable ages	not specified	Chronic toxicology	Sublette, Kansas
1678	88	Al-Deeb & Wilde	2003	Environmental Entomology 32(5): 1164-1170	Effect of Bt corn expressing the Cry3Bb1 toxin for corn rootworm control on aboveground nontarget arthropods	Academic	Department of Entomology, Kansas State University	na	na	yes	United States	North America	yes	4a	Field	Table 3	no	na	maize	Cry3Bb	Coleoptera	MON863	not specified	not specified	silk stage	61.5	30-93	cited from EPA document	na	na	na	na	no	na	na	Arthropoda	Insecta	Coleoptera	Elateridae	not specified	not specified	Elateridae	omnivore	Chewing	na	natural population of variable ages	not specified	Chronic toxicology	Sublette, Kansas
1679	88	Al-Deeb & Wilde	2003	Environmental Entomology 32(5): 1164-1170	Effect of Bt corn expressing the Cry3Bb1 toxin for corn rootworm control on aboveground nontarget arthropods	Academic	Department of Entomology, Kansas State University	na	na	yes	United States	North America	yes	4a	Field	Table 3	no	na	maize	Cry3Bb	Coleoptera	MON863	not specified	not specified	silk stage	61.5	30-93	cited from EPA document	na	na	na	na	no	na	na	Arthropoda	Insecta	Coleoptera	Staphylinidae	not specified	not specified	Staphylinidae	predator	Chewing	na	natural population of variable ages	not specified	Chronic toxicology	Sublette, Kansas
1680	88	Al-Deeb & Wilde	2003	Environmental Entomology 32(5): 1164-1170	Effect of Bt corn expressing the Cry3Bb1 toxin for corn rootworm control on aboveground nontarget arthropods	Academic	Department of Entomology, Kansas State University	na	na	yes	United States	North America	yes	4a	Field	Table 3	no	na	maize	Cry3Bb	Coleoptera	MON863	not specified	not specified	silk stage	61.5	30-93	cited from EPA document	na	na	na	na	no	na	na	Arthropoda	Insecta	Orthoptera	Gryllidae	not specified	not specified	Gryllidae	omnivore	Chewing	na	natural population of variable ages	not specified	Chronic toxicology	Sublette, Kansas
1681	88	Al-Deeb & Wilde	2003	Environmental Entomology 32(5): 1164-1170	Effect of Bt corn expressing the Cry3Bb1 toxin for corn rootworm control on aboveground nontarget arthropods	Academic	Department of Entomology, Kansas State University	na	na	yes	United States	North America	yes	4a	Field	Table 3	no	na	maize	Cry3Bb	Coleoptera	MON863	not specified	not specified	silk stage	61.5	30-93	cited from EPA document	na	na	na	na	no	na	na	Arthropoda	Arachnida	Araneae	not specified	not specified	not specified	Araneae	predator	Piercing	na	natural population of variable ages	not specified	Chronic toxicology	Sublette, Kansas
1682	88	Al-Deeb & Wilde	2003	Environmental Entomology 32(5): 1164-1170	Effect of Bt corn expressing the Cry3Bb1 toxin for corn rootworm control on aboveground nontarget arthropods	Academic	Department of Entomology, Kansas State University	na	na	yes	United States	North America	yes	4a	Field	Table 3	no	na	maize	Cry3Bb	Coleoptera	MON863	not specified	not specified	silk stage	61.5	30-93	cited from EPA document	na	na	na	na	no	na	na	Arthropoda	Insecta	Coleoptera	Cleridae	not specified	not specified	Cleridae	predator	Chewing	na	natural population of variable ages	not specified	Chronic toxicology	Sublette, Kansas
1683	88	Al-Deeb & Wilde	2003	Environmental Entomology 32(5): 1164-1170	Effect of Bt corn expressing the Cry3Bb1 toxin for corn rootworm control on aboveground nontarget arthropods	Academic	Department of Entomology, Kansas State University	na	na	yes	United States	North America	yes	4b	Field	Table 1	no	na	maize	Cry3Bb	Coleoptera	MON863	not specified	not specified	silk stage	61.5	30-93	cited from EPA document	na	na	na	na	no	na	na	Arthropoda	Insecta	Hemiptera	Anthocoridae	Orius	Orius insidiosus	Orius insidiosus	predator	Piercing	na	natural population of variable ages	adult	Chronic toxicology	Sublette, Kansas
1684	88	Al-Deeb & Wilde	2003	Environmental Entomology 32(5): 1164-1170	Effect of Bt corn expressing the Cry3Bb1 toxin for corn rootworm control on aboveground nontarget arthropods	Academic	Department of Entomology, Kansas State University	na	na	yes	United States	North America	yes	4b	Field	Table 1	no	na	maize	Cry3Bb	Coleoptera	MON863	not specified	not specified	silk stage	61.5	30-93	cited from EPA document	na	na	na	na	no	na	na	Arthropoda	Insecta	Hemiptera	Anthocoridae	Orius	Orius insidiosus	Orius insidiosus	predator	Piercing	na	natural population of variable ages	nymph	Chronic toxicology	Sublette, Kansas
1685	88	Al-Deeb & Wilde	2003	Environmental Entomology 32(5): 1164-1170	Effect of Bt corn expressing the Cry3Bb1 toxin for corn rootworm control on aboveground nontarget arthropods	Academic	Department of Entomology, Kansas State University	na	na	yes	United States	North America	yes	4b	Field	Table 3	no	na	maize	Cry3Bb	Coleoptera	MON863	not specified	not specified	silk stage	61.5	30-93	cited from EPA document	na	na	na	na	no	na	na	Arthropoda	Insecta	Coleoptera	Carabidae	not specified	not specified	Carabidae	mixed	Chewing	na	natural population of variable ages	not specified	Chronic toxicology	Sublette, Kansas
1686	88	Al-Deeb & Wilde	2003	Environmental Entomology 32(5): 1164-1170	Effect of Bt corn expressing the Cry3Bb1 toxin for corn rootworm control on aboveground nontarget arthropods	Academic	Department of Entomology, Kansas State University	na	na	yes	United States	North America	yes	4b	Field	Table 3	no	na	maize	Cry3Bb	Coleoptera	MON863	not specified	not specified	silk stage	61.5	30-93	cited from EPA document	na	na	na	na	no	na	na	Arthropoda	Insecta	Coleoptera	Elateridae	not specified	not specified	Elateridae	omnivore	Chewing	na	natural population of variable ages	not specified	Chronic toxicology	Sublette, Kansas
1687	88	Al-Deeb & Wilde	2003	Environmental Entomology 32(5): 1164-1170	Effect of Bt corn expressing the Cry3Bb1 toxin for corn rootworm control on aboveground nontarget arthropods	Academic	Department of Entomology, Kansas State University	na	na	yes	United States	North America	yes	4b	Field	Table 3	no	na	maize	Cry3Bb	Coleoptera	MON863	not specified	not specified	silk stage	61.5	30-93	cited from EPA document	na	na	na	na	no	na	na	Arthropoda	Insecta	Coleoptera	Staphylinidae	not specified	not specified	Staphylinidae	predator	Chewing	na	natural population of variable ages	not specified	Chronic toxicology	Sublette, Kansas
1688	88	Al-Deeb & Wilde	2003	Environmental Entomology 32(5): 1164-1170	Effect of Bt corn expressing the Cry3Bb1 toxin for corn rootworm control on aboveground nontarget arthropods	Academic	Department of Entomology, Kansas State University	na	na	yes	United States	North America	yes	4b	Field	Table 3	no	na	maize	Cry3Bb	Coleoptera	MON863	not specified	not specified	silk stage	61.5	30-93	cited from EPA document	na	na	na	na	no	na	na	Arthropoda	Insecta	Orthoptera	Gryllidae	not specified	not specified	Gryllidae	omnivore	Chewing	na	natural population of variable ages	not specified	Chronic toxicology	Sublette, Kansas
1689	88	Al-Deeb & Wilde	2003	Environmental Entomology 32(5): 1164-1170	Effect of Bt corn expressing the Cry3Bb1 toxin for corn rootworm control on aboveground nontarget arthropods	Academic	Department of Entomology, Kansas State University	na	na	yes	United States	North America	yes	4b	Field	Table 3	no	na	maize	Cry3Bb	Coleoptera	MON863	not specified	not specified	silk stage	61.5	30-93	cited from EPA document	na	na	na	na	no	na	na	Arthropoda	Arachnida	Araneae	not specified	not specified	not specified	Araneae	predator	Piercing	na	natural population of variable ages	not specified	Chronic toxicology	Sublette, Kansas
1690	88	Al-Deeb & Wilde	2003	Environmental Entomology 32(5): 1164-1170	Effect of Bt corn expressing the Cry3Bb1 toxin for corn rootworm control on aboveground nontarget arthropods	Academic	Department of Entomology, Kansas State University	na	na	yes	United States	North America	yes	4b	Field	Table 3	no	na	maize	Cry3Bb	Coleoptera	MON863	not specified	not specified	silk stage	61.5	30-93	cited from EPA document	na	na	na	na	no	na	na	Arthropoda	Insecta	Coleoptera	Cleridae	not specified	not specified	Cleridae	predator	Chewing	na	natural population of variable ages	not specified	Chronic toxicology	Sublette, Kansas
1691	88	Al-Deeb & Wilde	2003	Environmental Entomology 32(5): 1164-1170	Effect of Bt corn expressing the Cry3Bb1 toxin for corn rootworm control on aboveground nontarget arthropods	Academic	Department of Entomology, Kansas State University	na	na	yes	United States	North America	yes	5a	Field	Table 2	no	na	maize	Cry3Bb	Coleoptera	MON863	not specified	not specified	silk stage	61.5	30-93	cited from EPA document	na	na	na	na	no	na	na	Arthropoda	Insecta	Hemiptera	Anthocoridae	Orius	Orius insidiosus	Orius insidiosus	predator	Piercing	na	natural population of variable ages	adult	Chronic toxicology	Manhattan, Kansas
1692	88	Al-Deeb & Wilde	2003	Environmental Entomology 32(5): 1164-1170	Effect of Bt corn expressing the Cry3Bb1 toxin for corn rootworm control on aboveground nontarget arthropods	Academic	Department of Entomology, Kansas State University	na	na	yes	United States	North America	yes	5a	Field	Table 2	no	na	maize	Cry3Bb	Coleoptera	MON863	not specified	not specified	silk stage	61.5	30-93	cited from EPA document	na	na	na	na	no	na	na	Arthropoda	Insecta	Hemiptera	Anthocoridae	Orius	Orius insidiosus	Orius insidiosus	predator	Piercing	na	natural population of variable ages	nymph	Chronic toxicology	Manhattan, Kansas
1693	88	Al-Deeb & Wilde	2003	Environmental Entomology 32(5): 1164-1170	Effect of Bt corn expressing the Cry3Bb1 toxin for corn rootworm control on aboveground nontarget arthropods	Academic	Department of Entomology, Kansas State University	na	na	yes	United States	North America	yes	5a	Field	Table 2	no	na	maize	Cry3Bb	Coleoptera	MON863	not specified	not specified	silk stage	61.5	30-93	cited from EPA document	na	na	na	na	no	na	na	Arthropoda	Insecta	Coleoptera	Coccinellidae	Coleomegilla	Coleomegilla maculata	Coleomegilla maculata	predator	Chewing	na	natural population of variable ages	adult	Chronic toxicology	Manhattan, Kansas
1694	88	Al-Deeb & Wilde	2003	Environmental Entomology 32(5): 1164-1170	Effect of Bt corn expressing the Cry3Bb1 toxin for corn rootworm control on aboveground nontarget arthropods	Academic	Department of Entomology, Kansas State University	na	na	yes	United States	North America	yes	5a	Field	Table 2	no	na	maize	Cry3Bb	Coleoptera	MON863	not specified	not specified	silk stage	61.5	30-93	cited from EPA document	na	na	na	na	no	na	na	Arthropoda	Insecta	Coleoptera	Coccinellidae	Hippodamia	Hippodamia convergens	Hippodamia convergens	predator	Chewing	na	natural population of variable ages	adult	Chronic toxicology	Manhattan, Kansas
1695	88	Al-Deeb & Wilde	2003	Environmental Entomology 32(5): 1164-1170	Effect of Bt corn expressing the Cry3Bb1 toxin for corn rootworm control on aboveground nontarget arthropods	Academic	Department of Entomology, Kansas State University	na	na	yes	United States	North America	yes	5a	Field	Table 2	no	na	maize	Cry3Bb	Coleoptera	MON863	not specified	not specified	silk stage	61.5	30-93	cited from EPA document	na	na	na	na	no	na	na	Arthropoda	Insecta	Coleoptera	Coccinellidae	Scymnus	not specified	Scymnus	predator	Chewing	na	natural population of variable ages	adult	Chronic toxicology	Manhattan, Kansas
1696	88	Al-Deeb & Wilde	2003	Environmental Entomology 32(5): 1164-1170	Effect of Bt corn expressing the Cry3Bb1 toxin for corn rootworm control on aboveground nontarget arthropods	Academic	Department of Entomology, Kansas State University	na	na	yes	United States	North America	yes	5a	Field	Table 4	no	na	maize	Cry3Bb	Coleoptera	MON863	not specified	not specified	silk stage	61.5	30-93	cited from EPA document	na	na	na	na	no	na	na	Arthropoda	Insecta	Coleoptera	Carabidae	not specified	not specified	Carabidae	mixed	Chewing	na	natural population of variable ages	not specified	Chronic toxicology	Manhattan, Kansas
1697	88	Al-Deeb & Wilde	2003	Environmental Entomology 32(5): 1164-1170	Effect of Bt corn expressing the Cry3Bb1 toxin for corn rootworm control on aboveground nontarget arthropods	Academic	Department of Entomology, Kansas State University	na	na	yes	United States	North America	yes	5a	Field	Table 4	no	na	maize	Cry3Bb	Coleoptera	MON863	not specified	not specified	silk stage	61.5	30-93	cited from EPA document	na	na	na	na	no	na	na	Arthropoda	Insecta	Coleoptera	Elateridae	not specified	not specified	Elateridae	omnivore	Chewing	na	natural population of variable ages	not specified	Chronic toxicology	Manhattan, Kansas
1698	88	Al-Deeb & Wilde	2003	Environmental Entomology 32(5): 1164-1170	Effect of Bt corn expressing the Cry3Bb1 toxin for corn rootworm control on aboveground nontarget arthropods	Academic	Department of Entomology, Kansas State University	na	na	yes	United States	North America	yes	5a	Field	Table 4	no	na	maize	Cry3Bb	Coleoptera	MON863	not specified	not specified	silk stage	61.5	30-93	cited from EPA document	na	na	na	na	no	na	na	Arthropoda	Insecta	Coleoptera	Staphylinidae	not specified	not specified	Staphylinidae	predator	Chewing	na	natural population of variable ages	not specified	Chronic toxicology	Manhattan, Kansas
1699	88	Al-Deeb & Wilde	2003	Environmental Entomology 32(5): 1164-1170	Effect of Bt corn expressing the Cry3Bb1 toxin for corn rootworm control on aboveground nontarget arthropods	Academic	Department of Entomology, Kansas State University	na	na	yes	United States	North America	yes	5a	Field	Table 4	no	na	maize	Cry3Bb	Coleoptera	MON863	not specified	not specified	silk stage	61.5	30-93	cited from EPA document	na	na	na	na	no	na	na	Arthropoda	Insecta	Coleoptera	Scarabaeidae	not specified	not specified	Scarabaeidae	herbivore	Chewing	na	natural population of variable ages	not specified	Chronic toxicology	Manhattan, Kansas
1700	88	Al-Deeb & Wilde	2003	Environmental Entomology 32(5): 1164-1170	Effect of Bt corn expressing the Cry3Bb1 toxin for corn rootworm control on aboveground nontarget arthropods	Academic	Department of Entomology, Kansas State University	na	na	yes	United States	North America	yes	5a	Field	Table 4	no	na	maize	Cry3Bb	Coleoptera	MON863	not specified	not specified	silk stage	61.5	30-93	cited from EPA document	na	na	na	na	no	na	na	Arthropoda	Insecta	Hymenoptera	Formicidae	not specified	not specified	Formicidae	omnivore	Mandibulate-sucking	na	natural population of variable ages	not specified	Chronic toxicology	Manhattan, Kansas
1701	88	Al-Deeb & Wilde	2003	Environmental Entomology 32(5): 1164-1170	Effect of Bt corn expressing the Cry3Bb1 toxin for corn rootworm control on aboveground nontarget arthropods	Academic	Department of Entomology, Kansas State University	na	na	yes	United States	North America	yes	5a	Field	Table 4	no	na	maize	Cry3Bb	Coleoptera	MON863	not specified	not specified	silk stage	61.5	30-93	cited from EPA document	na	na	na	na	no	na	na	Arthropoda	Insecta	Orthoptera	Gryllidae	not specified	not specified	Gryllidae	omnivore	Chewing	na	natural population of variable ages	not specified	Chronic toxicology	Manhattan, Kansas
1702	88	Al-Deeb & Wilde	2003	Environmental Entomology 32(5): 1164-1170	Effect of Bt corn expressing the Cry3Bb1 toxin for corn rootworm control on aboveground nontarget arthropods	Academic	Department of Entomology, Kansas State University	na	na	yes	United States	North America	yes	5a	Field	Table 4	no	na	maize	Cry3Bb	Coleoptera	MON863	not specified	not specified	silk stage	61.5	30-93	cited from EPA document	na	na	na	na	no	na	na	Arthropoda	Arachnida	Araneae	not specified	not specified	not specified	Araneae	predator	Piercing	na	natural population of variable ages	not specified	Chronic toxicology	Manhattan, Kansas
1703	88	Al-Deeb & Wilde	2003	Environmental Entomology 32(5): 1164-1170	Effect of Bt corn expressing the Cry3Bb1 toxin for corn rootworm control on aboveground nontarget arthropods	Academic	Department of Entomology, Kansas State University	na	na	yes	United States	North America	yes	5a	Field	Table 4	no	na	maize	Cry3Bb	Coleoptera	MON863	not specified	not specified	silk stage	61.5	30-93	cited from EPA document	na	na	na	na	no	na	na	Arthropoda	Insecta	Coleoptera	Cicindelidae	not specified	not specified	Cicindelidae	predator	Chewing	na	natural population of variable ages	not specified	Chronic toxicology	Manhattan, Kansas
1704	88	Al-Deeb & Wilde	2003	Environmental Entomology 32(5): 1164-1170	Effect of Bt corn expressing the Cry3Bb1 toxin for corn rootworm control on aboveground nontarget arthropods	Academic	Department of Entomology, Kansas State University	na	na	yes	United States	North America	yes	5b	Field	Table 2	no	na	maize	Cry3Bb	Coleoptera	MON863	not specified	not specified	silk stage	61.5	30-93	cited from EPA document	na	na	na	na	no	na	na	Arthropoda	Insecta	Hemiptera	Anthocoridae	Orius	Orius insidiosus	Orius insidiosus	predator	Piercing	na	natural population of variable ages	adult	Chronic toxicology	Manhattan, Kansas
1705	88	Al-Deeb & Wilde	2003	Environmental Entomology 32(5): 1164-1170	Effect of Bt corn expressing the Cry3Bb1 toxin for corn rootworm control on aboveground nontarget arthropods	Academic	Department of Entomology, Kansas State University	na	na	yes	United States	North America	yes	5b	Field	Table 2	no	na	maize	Cry3Bb	Coleoptera	MON863	not specified	not specified	silk stage	61.5	30-93	cited from EPA document	na	na	na	na	no	na	na	Arthropoda	Insecta	Hemiptera	Anthocoridae	Orius	Orius insidiosus	Orius insidiosus	predator	Piercing	na	natural population of variable ages	nymph	Chronic toxicology	Manhattan, Kansas
1706	88	Al-Deeb & Wilde	2003	Environmental Entomology 32(5): 1164-1170	Effect of Bt corn expressing the Cry3Bb1 toxin for corn rootworm control on aboveground nontarget arthropods	Academic	Department of Entomology, Kansas State University	na	na	yes	United States	North America	yes	5b	Field	Table 2	no	na	maize	Cry3Bb	Coleoptera	MON863	not specified	not specified	silk stage	61.5	30-93	cited from EPA document	na	na	na	na	no	na	na	Arthropoda	Insecta	Coleoptera	Coccinellidae	Coleomegilla	Coleomegilla maculata	Coleomegilla maculata	predator	Chewing	na	natural population of variable ages	adult	Chronic toxicology	Manhattan, Kansas
1707	88	Al-Deeb & Wilde	2003	Environmental Entomology 32(5): 1164-1170	Effect of Bt corn expressing the Cry3Bb1 toxin for corn rootworm control on aboveground nontarget arthropods	Academic	Department of Entomology, Kansas State University	na	na	yes	United States	North America	yes	5b	Field	Table 2	no	na	maize	Cry3Bb	Coleoptera	MON863	not specified	not specified	silk stage	61.5	30-93	cited from EPA document	na	na	na	na	no	na	na	Arthropoda	Insecta	Coleoptera	Coccinellidae	Hippodamia	Hippodamia convergens	Hippodamia convergens	predator	Chewing	na	natural population of variable ages	adult	Chronic toxicology	Manhattan, Kansas
1708	88	Al-Deeb & Wilde	2003	Environmental Entomology 32(5): 1164-1170	Effect of Bt corn expressing the Cry3Bb1 toxin for corn rootworm control on aboveground nontarget arthropods	Academic	Department of Entomology, Kansas State University	na	na	yes	United States	North America	yes	5b	Field	Table 2	no	na	maize	Cry3Bb	Coleoptera	MON863	not specified	not specified	silk stage	61.5	30-93	cited from EPA document	na	na	na	na	no	na	na	Arthropoda	Insecta	Coleoptera	Coccinellidae	Scymnus	not specified	Scymnus	predator	Chewing	na	natural population of variable ages	adult	Chronic toxicology	Manhattan, Kansas
1709	88	Al-Deeb & Wilde	2003	Environmental Entomology 32(5): 1164-1170	Effect of Bt corn expressing the Cry3Bb1 toxin for corn rootworm control on aboveground nontarget arthropods	Academic	Department of Entomology, Kansas State University	na	na	yes	United States	North America	yes	5b	Field	Table 4	no	na	maize	Cry3Bb	Coleoptera	MON863	not specified	not specified	silk stage	61.5	30-93	cited from EPA document	na	na	na	na	no	na	na	Arthropoda	Insecta	Coleoptera	Carabidae	not specified	not specified	Carabidae	mixed	Chewing	na	natural population of variable ages	not specified	Chronic toxicology	Manhattan, Kansas
1710	88	Al-Deeb & Wilde	2003	Environmental Entomology 32(5): 1164-1170	Effect of Bt corn expressing the Cry3Bb1 toxin for corn rootworm control on aboveground nontarget arthropods	Academic	Department of Entomology, Kansas State University	na	na	yes	United States	North America	yes	5b	Field	Table 4	no	na	maize	Cry3Bb	Coleoptera	MON863	not specified	not specified	silk stage	61.5	30-93	cited from EPA document	na	na	na	na	no	na	na	Arthropoda	Insecta	Coleoptera	Elateridae	not specified	not specified	Elateridae	omnivore	Chewing	na	natural population of variable ages	not specified	Chronic toxicology	Manhattan, Kansas
1711	88	Al-Deeb & Wilde	2003	Environmental Entomology 32(5): 1164-1170	Effect of Bt corn expressing the Cry3Bb1 toxin for corn rootworm control on aboveground nontarget arthropods	Academic	Department of Entomology, Kansas State University	na	na	yes	United States	North America	yes	5b	Field	Table 4	no	na	maize	Cry3Bb	Coleoptera	MON863	not specified	not specified	silk stage	61.5	30-93	cited from EPA document	na	na	na	na	no	na	na	Arthropoda	Insecta	Coleoptera	Staphylinidae	not specified	not specified	Staphylinidae	predator	Chewing	na	natural population of variable ages	not specified	Chronic toxicology	Manhattan, Kansas
1712	88	Al-Deeb & Wilde	2003	Environmental Entomology 32(5): 1164-1170	Effect of Bt corn expressing the Cry3Bb1 toxin for corn rootworm control on aboveground nontarget arthropods	Academic	Department of Entomology, Kansas State University	na	na	yes	United States	North America	yes	5b	Field	Table 4	no	na	maize	Cry3Bb	Coleoptera	MON863	not specified	not specified	silk stage	61.5	30-93	cited from EPA document	na	na	na	na	no	na	na	Arthropoda	Insecta	Coleoptera	Scarabaeidae	not specified	not specified	Scarabaeidae	herbivore	Chewing	na	natural population of variable ages	not specified	Chronic toxicology	Manhattan, Kansas
1713	88	Al-Deeb & Wilde	2003	Environmental Entomology 32(5): 1164-1170	Effect of Bt corn expressing the Cry3Bb1 toxin for corn rootworm control on aboveground nontarget arthropods	Academic	Department of Entomology, Kansas State University	na	na	yes	United States	North America	yes	5b	Field	Table 4	no	na	maize	Cry3Bb	Coleoptera	MON863	not specified	not specified	silk stage	61.5	30-93	cited from EPA document	na	na	na	na	no	na	na	Arthropoda	Insecta	Hymenoptera	Formicidae	not specified	not specified	Formicidae	omnivore	Mandibulate-sucking	na	natural population of variable ages	not specified	Chronic toxicology	Manhattan, Kansas
1714	88	Al-Deeb & Wilde	2003	Environmental Entomology 32(5): 1164-1170	Effect of Bt corn expressing the Cry3Bb1 toxin for corn rootworm control on aboveground nontarget arthropods	Academic	Department of Entomology, Kansas State University	na	na	yes	United States	North America	yes	5b	Field	Table 4	no	na	maize	Cry3Bb	Coleoptera	MON863	not specified	not specified	silk stage	61.5	30-93	cited from EPA document	na	na	na	na	no	na	na	Arthropoda	Insecta	Orthoptera	Gryllidae	not specified	not specified	Gryllidae	omnivore	Chewing	na	natural population of variable ages	not specified	Chronic toxicology	Manhattan, Kansas
1715	88	Al-Deeb & Wilde	2003	Environmental Entomology 32(5): 1164-1170	Effect of Bt corn expressing the Cry3Bb1 toxin for corn rootworm control on aboveground nontarget arthropods	Academic	Department of Entomology, Kansas State University	na	na	yes	United States	North America	yes	5b	Field	Table 4	no	na	maize	Cry3Bb	Coleoptera	MON863	not specified	not specified	silk stage	61.5	30-93	cited from EPA document	na	na	na	na	no	na	na	Arthropoda	Arachnida	Araneae	not specified	not specified	not specified	Araneae	predator	Piercing	na	natural population of variable ages	not specified	Chronic toxicology	Manhattan, Kansas
1716	88	Al-Deeb & Wilde	2003	Environmental Entomology 32(5): 1164-1170	Effect of Bt corn expressing the Cry3Bb1 toxin for corn rootworm control on aboveground nontarget arthropods	Academic	Department of Entomology, Kansas State University	na	na	yes	United States	North America	yes	5b	Field	Table 4	no	na	maize	Cry3Bb	Coleoptera	MON863	not specified	not specified	silk stage	61.5	30-93	cited from EPA document	na	na	na	na	no	na	na	Arthropoda	Insecta	Coleoptera	Cicindelidae	not specified	not specified	Cicindelidae	predator	Chewing	na	natural population of variable ages	not specified	Chronic toxicology	Manhattan, Kansas
1717	88	Al-Deeb & Wilde	2003	Environmental Entomology 32(5): 1164-1170	Effect of Bt corn expressing the Cry3Bb1 toxin for corn rootworm control on aboveground nontarget arthropods	Academic	Department of Entomology, Kansas State University	na	na	yes	United States	North America	yes	6a	Field	Table 2	no	na	maize	Cry3Bb	Coleoptera	MON863	not specified	not specified	silk stage	61.5	30-93	cited from EPA document	na	na	na	na	no	na	na	Arthropoda	Insecta	Hemiptera	Anthocoridae	Orius	Orius insidiosus	Orius insidiosus	predator	Piercing	EMUE	natural population of variable ages	adult	Chronic toxicology	Scandia, Kansas (1)
1718	88	Al-Deeb & Wilde	2003	Environmental Entomology 32(5): 1164-1170	Effect of Bt corn expressing the Cry3Bb1 toxin for corn rootworm control on aboveground nontarget arthropods	Academic	Department of Entomology, Kansas State University	na	na	yes	United States	North America	yes	6a	Field	Table 2	no	na	maize	Cry3Bb	Coleoptera	MON863	not specified	not specified	silk stage	61.5	30-93	cited from EPA document	na	na	na	na	no	na	na	Arthropoda	Insecta	Hemiptera	Anthocoridae	Orius	Orius insidiosus	Orius insidiosus	predator	Piercing	EMUE	natural population of variable ages	nymph	Chronic toxicology	Scandia, Kansas (1)
1719	88	Al-Deeb & Wilde	2003	Environmental Entomology 32(5): 1164-1170	Effect of Bt corn expressing the Cry3Bb1 toxin for corn rootworm control on aboveground nontarget arthropods	Academic	Department of Entomology, Kansas State University	na	na	yes	United States	North America	yes	6a	Field	Table 2	no	na	maize	Cry3Bb	Coleoptera	MON863	not specified	not specified	silk stage	61.5	30-93	cited from EPA document	na	na	na	na	no	na	na	Arthropoda	Insecta	Coleoptera	Coccinellidae	Coleomegilla	Coleomegilla maculata	Coleomegilla maculata	predator	Chewing	EMUE	natural population of variable ages	adult	Chronic toxicology	Scandia, Kansas (1)
1720	88	Al-Deeb & Wilde	2003	Environmental Entomology 32(5): 1164-1170	Effect of Bt corn expressing the Cry3Bb1 toxin for corn rootworm control on aboveground nontarget arthropods	Academic	Department of Entomology, Kansas State University	na	na	yes	United States	North America	yes	6a	Field	Table 2	no	na	maize	Cry3Bb	Coleoptera	MON863	not specified	not specified	silk stage	61.5	30-93	cited from EPA document	na	na	na	na	no	na	na	Arthropoda	Insecta	Coleoptera	Coccinellidae	Hippodamia	Hippodamia convergens	Hippodamia convergens	predator	Chewing	EMUE	natural population of variable ages	adult	Chronic toxicology	Scandia, Kansas (1)
1721	88	Al-Deeb & Wilde	2003	Environmental Entomology 32(5): 1164-1170	Effect of Bt corn expressing the Cry3Bb1 toxin for corn rootworm control on aboveground nontarget arthropods	Academic	Department of Entomology, Kansas State University	na	na	yes	United States	North America	yes	6a	Field	Table 2	no	na	maize	Cry3Bb	Coleoptera	MON863	not specified	not specified	silk stage	61.5	30-93	cited from EPA document	na	na	na	na	no	na	na	Arthropoda	Insecta	Coleoptera	Coccinellidae	Scymnus	not specified	Scymnus	predator	Chewing	EMUE	natural population of variable ages	adult	Chronic toxicology	Scandia, Kansas (1)
1722	88	Al-Deeb & Wilde	2003	Environmental Entomology 32(5): 1164-1170	Effect of Bt corn expressing the Cry3Bb1 toxin for corn rootworm control on aboveground nontarget arthropods	Academic	Department of Entomology, Kansas State University	na	na	yes	United States	North America	yes	6b	Field	Table 2	no	na	maize	Cry3Bb	Coleoptera	MON863	not specified	not specified	silk stage	61.5	30-93	cited from EPA document	na	na	na	na	no	na	na	Arthropoda	Insecta	Hemiptera	Anthocoridae	Orius	Orius insidiosus	Orius insidiosus	predator	Piercing	EMUE	natural population of variable ages	adult	Chronic toxicology	Scandia, Kansas (1)
1723	88	Al-Deeb & Wilde	2003	Environmental Entomology 32(5): 1164-1170	Effect of Bt corn expressing the Cry3Bb1 toxin for corn rootworm control on aboveground nontarget arthropods	Academic	Department of Entomology, Kansas State University	na	na	yes	United States	North America	yes	6b	Field	Table 2	no	na	maize	Cry3Bb	Coleoptera	MON863	not specified	not specified	silk stage	61.5	30-93	cited from EPA document	na	na	na	na	no	na	na	Arthropoda	Insecta	Hemiptera	Anthocoridae	Orius	Orius insidiosus	Orius insidiosus	predator	Piercing	EMUE	natural population of variable ages	nymph	Chronic toxicology	Scandia, Kansas (1)
1724	88	Al-Deeb & Wilde	2003	Environmental Entomology 32(5): 1164-1170	Effect of Bt corn expressing the Cry3Bb1 toxin for corn rootworm control on aboveground nontarget arthropods	Academic	Department of Entomology, Kansas State University	na	na	yes	United States	North America	yes	6b	Field	Table 2	no	na	maize	Cry3Bb	Coleoptera	MON863	not specified	not specified	silk stage	61.5	30-93	cited from EPA document	na	na	na	na	no	na	na	Arthropoda	Insecta	Coleoptera	Coccinellidae	Coleomegilla	Coleomegilla maculata	Coleomegilla maculata	predator	Chewing	EMUE	natural population of variable ages	adult	Chronic toxicology	Scandia, Kansas (1)
1725	88	Al-Deeb & Wilde	2003	Environmental Entomology 32(5): 1164-1170	Effect of Bt corn expressing the Cry3Bb1 toxin for corn rootworm control on aboveground nontarget arthropods	Academic	Department of Entomology, Kansas State University	na	na	yes	United States	North America	yes	6b	Field	Table 2	no	na	maize	Cry3Bb	Coleoptera	MON863	not specified	not specified	silk stage	61.5	30-93	cited from EPA document	na	na	na	na	no	na	na	Arthropoda	Insecta	Coleoptera	Coccinellidae	Scymnus	not specified	Scymnus	predator	Chewing	EMUE	natural population of variable ages	adult	Chronic toxicology	Scandia, Kansas (1)
1726	88	Al-Deeb & Wilde	2003	Environmental Entomology 32(5): 1164-1170	Effect of Bt corn expressing the Cry3Bb1 toxin for corn rootworm control on aboveground nontarget arthropods	Academic	Department of Entomology, Kansas State University	na	na	yes	United States	North America	yes	6c	Field	Table 2	no	na	maize	Cry3Bb	Coleoptera	MON863	not specified	not specified	silk stage	61.5	30-93	cited from EPA document	na	na	na	na	no	na	na	Arthropoda	Insecta	Hemiptera	Anthocoridae	Orius	Orius insidiosus	Orius insidiosus	predator	Piercing	EMUE	natural population of variable ages	adult	Chronic toxicology	Scandia, Kansas (1)
1727	88	Al-Deeb & Wilde	2003	Environmental Entomology 32(5): 1164-1170	Effect of Bt corn expressing the Cry3Bb1 toxin for corn rootworm control on aboveground nontarget arthropods	Academic	Department of Entomology, Kansas State University	na	na	yes	United States	North America	yes	6c	Field	Table 2	no	na	maize	Cry3Bb	Coleoptera	MON863	not specified	not specified	silk stage	61.5	30-93	cited from EPA document	na	na	na	na	no	na	na	Arthropoda	Insecta	Hemiptera	Anthocoridae	Orius	Orius insidiosus	Orius insidiosus	predator	Piercing	EMUE	natural population of variable ages	nymph	Chronic toxicology	Scandia, Kansas (1)
1728	88	Al-Deeb & Wilde	2003	Environmental Entomology 32(5): 1164-1170	Effect of Bt corn expressing the Cry3Bb1 toxin for corn rootworm control on aboveground nontarget arthropods	Academic	Department of Entomology, Kansas State University	na	na	yes	United States	North America	yes	6c	Field	Table 2	no	na	maize	Cry3Bb	Coleoptera	MON863	not specified	not specified	silk stage	61.5	30-93	cited from EPA document	na	na	na	na	no	na	na	Arthropoda	Insecta	Coleoptera	Coccinellidae	Coleomegilla	Coleomegilla maculata	Coleomegilla maculata	predator	Chewing	EMUE	natural population of variable ages	adult	Chronic toxicology	Scandia, Kansas (1)
1729	88	Al-Deeb & Wilde	2003	Environmental Entomology 32(5): 1164-1170	Effect of Bt corn expressing the Cry3Bb1 toxin for corn rootworm control on aboveground nontarget arthropods	Academic	Department of Entomology, Kansas State University	na	na	yes	United States	North America	yes	6c	Field	Table 2	no	na	maize	Cry3Bb	Coleoptera	MON863	not specified	not specified	silk stage	61.5	30-93	cited from EPA document	na	na	na	na	no	na	na	Arthropoda	Insecta	Coleoptera	Coccinellidae	Scymnus	not specified	Scymnus	predator	Chewing	EMUE	natural population of variable ages	adult	Chronic toxicology	Scandia, Kansas (1)
1730	88	Al-Deeb & Wilde	2003	Environmental Entomology 32(5): 1164-1170	Effect of Bt corn expressing the Cry3Bb1 toxin for corn rootworm control on aboveground nontarget arthropods	Academic	Department of Entomology, Kansas State University	na	na	yes	United States	North America	yes	6d	Field	Table 2	no	na	maize	Cry3Bb	Coleoptera	MON863	not specified	not specified	silk stage	61.5	30-93	cited from EPA document	na	na	na	na	no	na	na	Arthropoda	Insecta	Hemiptera	Anthocoridae	Orius	Orius insidiosus	Orius insidiosus	predator	Piercing	na	natural population of variable ages	adult	Chronic toxicology	Scandia, Kansas (1)
1731	88	Al-Deeb & Wilde	2003	Environmental Entomology 32(5): 1164-1170	Effect of Bt corn expressing the Cry3Bb1 toxin for corn rootworm control on aboveground nontarget arthropods	Academic	Department of Entomology, Kansas State University	na	na	yes	United States	North America	yes	6d	Field	Table 2	no	na	maize	Cry3Bb	Coleoptera	MON863	not specified	not specified	silk stage	61.5	30-93	cited from EPA document	na	na	na	na	no	na	na	Arthropoda	Insecta	Hemiptera	Anthocoridae	Orius	Orius insidiosus	Orius insidiosus	predator	Piercing	na	natural population of variable ages	nymph	Chronic toxicology	Scandia, Kansas (1)
1732	88	Al-Deeb & Wilde	2003	Environmental Entomology 32(5): 1164-1170	Effect of Bt corn expressing the Cry3Bb1 toxin for corn rootworm control on aboveground nontarget arthropods	Academic	Department of Entomology, Kansas State University	na	na	yes	United States	North America	yes	6d	Field	Table 2	no	na	maize	Cry3Bb	Coleoptera	MON863	not specified	not specified	silk stage	61.5	30-93	cited from EPA document	na	na	na	na	no	na	na	Arthropoda	Insecta	Coleoptera	Coccinellidae	Coleomegilla	Coleomegilla maculata	Coleomegilla maculata	predator	Chewing	na	natural population of variable ages	adult	Chronic toxicology	Scandia, Kansas (1)
1733	88	Al-Deeb & Wilde	2003	Environmental Entomology 32(5): 1164-1170	Effect of Bt corn expressing the Cry3Bb1 toxin for corn rootworm control on aboveground nontarget arthropods	Academic	Department of Entomology, Kansas State University	na	na	yes	United States	North America	yes	6d	Field	Table 2	no	na	maize	Cry3Bb	Coleoptera	MON863	not specified	not specified	silk stage	61.5	30-93	cited from EPA document	na	na	na	na	no	na	na	Arthropoda	Insecta	Coleoptera	Coccinellidae	Hippodamia	Hippodamia convergens	Hippodamia convergens	predator	Chewing	na	natural population of variable ages	adult	Chronic toxicology	Scandia, Kansas (1)
1734	88	Al-Deeb & Wilde	2003	Environmental Entomology 32(5): 1164-1170	Effect of Bt corn expressing the Cry3Bb1 toxin for corn rootworm control on aboveground nontarget arthropods	Academic	Department of Entomology, Kansas State University	na	na	yes	United States	North America	yes	6d	Field	Table 2	no	na	maize	Cry3Bb	Coleoptera	MON863	not specified	not specified	silk stage	61.5	30-93	cited from EPA document	na	na	na	na	no	na	na	Arthropoda	Insecta	Coleoptera	Coccinellidae	Scymnus	not specified	Scymnus	predator	Chewing	na	natural population of variable ages	adult	Chronic toxicology	Scandia, Kansas (1)
1735	88	Al-Deeb & Wilde	2003	Environmental Entomology 32(5): 1164-1170	Effect of Bt corn expressing the Cry3Bb1 toxin for corn rootworm control on aboveground nontarget arthropods	Academic	Department of Entomology, Kansas State University	na	na	yes	United States	North America	yes	7a	Field	Table 2	no	na	maize	Cry3Bb	Coleoptera	MON863	not specified	not specified	silk stage	61.5	30-93	cited from EPA document	na	na	na	na	no	na	na	Arthropoda	Insecta	Hemiptera	Anthocoridae	Orius	Orius insidiosus	Orius insidiosus	predator	Piercing	EMUE	natural population of variable ages	adult	Chronic toxicology	Scandia, Kansas (2)
1736	88	Al-Deeb & Wilde	2003	Environmental Entomology 32(5): 1164-1170	Effect of Bt corn expressing the Cry3Bb1 toxin for corn rootworm control on aboveground nontarget arthropods	Academic	Department of Entomology, Kansas State University	na	na	yes	United States	North America	yes	7a	Field	Table 2	no	na	maize	Cry3Bb	Coleoptera	MON863	not specified	not specified	silk stage	61.5	30-93	cited from EPA document	na	na	na	na	no	na	na	Arthropoda	Insecta	Hemiptera	Anthocoridae	Orius	Orius insidiosus	Orius insidiosus	predator	Piercing	EMUE	natural population of variable ages	nymph	Chronic toxicology	Scandia, Kansas (2)
1737	88	Al-Deeb & Wilde	2003	Environmental Entomology 32(5): 1164-1170	Effect of Bt corn expressing the Cry3Bb1 toxin for corn rootworm control on aboveground nontarget arthropods	Academic	Department of Entomology, Kansas State University	na	na	yes	United States	North America	yes	7a	Field	Table 2	no	na	maize	Cry3Bb	Coleoptera	MON863	not specified	not specified	silk stage	61.5	30-93	cited from EPA document	na	na	na	na	no	na	na	Arthropoda	Insecta	Coleoptera	Coccinellidae	Coleomegilla	Coleomegilla maculata	Coleomegilla maculata	predator	Chewing	EMUE	natural population of variable ages	adult	Chronic toxicology	Scandia, Kansas (2)
1738	88	Al-Deeb & Wilde	2003	Environmental Entomology 32(5): 1164-1170	Effect of Bt corn expressing the Cry3Bb1 toxin for corn rootworm control on aboveground nontarget arthropods	Academic	Department of Entomology, Kansas State University	na	na	yes	United States	North America	yes	7b	Field	Table 2	no	na	maize	Cry3Bb	Coleoptera	MON863	not specified	not specified	silk stage	61.5	30-93	cited from EPA document	na	na	na	na	no	na	na	Arthropoda	Insecta	Hemiptera	Anthocoridae	Orius	Orius insidiosus	Orius insidiosus	predator	Piercing	EMUE	natural population of variable ages	adult	Chronic toxicology	Scandia, Kansas (2)
1739	88	Al-Deeb & Wilde	2003	Environmental Entomology 32(5): 1164-1170	Effect of Bt corn expressing the Cry3Bb1 toxin for corn rootworm control on aboveground nontarget arthropods	Academic	Department of Entomology, Kansas State University	na	na	yes	United States	North America	yes	7b	Field	Table 2	no	na	maize	Cry3Bb	Coleoptera	MON863	not specified	not specified	silk stage	61.5	30-93	cited from EPA document	na	na	na	na	no	na	na	Arthropoda	Insecta	Hemiptera	Anthocoridae	Orius	Orius insidiosus	Orius insidiosus	predator	Piercing	EMUE	natural population of variable ages	nymph	Chronic toxicology	Scandia, Kansas (2)
1740	88	Al-Deeb & Wilde	2003	Environmental Entomology 32(5): 1164-1170	Effect of Bt corn expressing the Cry3Bb1 toxin for corn rootworm control on aboveground nontarget arthropods	Academic	Department of Entomology, Kansas State University	na	na	yes	United States	North America	yes	7b	Field	Table 2	no	na	maize	Cry3Bb	Coleoptera	MON863	not specified	not specified	silk stage	61.5	30-93	cited from EPA document	na	na	na	na	no	na	na	Arthropoda	Insecta	Coleoptera	Coccinellidae	Coleomegilla	Coleomegilla maculata	Coleomegilla maculata	predator	Chewing	EMUE	natural population of variable ages	adult	Chronic toxicology	Scandia, Kansas (2)
1741	88	Al-Deeb & Wilde	2003	Environmental Entomology 32(5): 1164-1170	Effect of Bt corn expressing the Cry3Bb1 toxin for corn rootworm control on aboveground nontarget arthropods	Academic	Department of Entomology, Kansas State University	na	na	yes	United States	North America	yes	7c	Field	Table 2	no	na	maize	Cry3Bb	Coleoptera	MON863	not specified	not specified	silk stage	61.5	30-93	cited from EPA document	na	na	na	na	no	na	na	Arthropoda	Insecta	Hemiptera	Anthocoridae	Orius	Orius insidiosus	Orius insidiosus	predator	Piercing	EMUE	natural population of variable ages	adult	Chronic toxicology	Scandia, Kansas (2)
1742	88	Al-Deeb & Wilde	2003	Environmental Entomology 32(5): 1164-1170	Effect of Bt corn expressing the Cry3Bb1 toxin for corn rootworm control on aboveground nontarget arthropods	Academic	Department of Entomology, Kansas State University	na	na	yes	United States	North America	yes	7c	Field	Table 2	no	na	maize	Cry3Bb	Coleoptera	MON863	not specified	not specified	silk stage	61.5	30-93	cited from EPA document	na	na	na	na	no	na	na	Arthropoda	Insecta	Hemiptera	Anthocoridae	Orius	Orius insidiosus	Orius insidiosus	predator	Piercing	EMUE	natural population of variable ages	nymph	Chronic toxicology	Scandia, Kansas (2)
1743	88	Al-Deeb & Wilde	2003	Environmental Entomology 32(5): 1164-1170	Effect of Bt corn expressing the Cry3Bb1 toxin for corn rootworm control on aboveground nontarget arthropods	Academic	Department of Entomology, Kansas State University	na	na	yes	United States	North America	yes	7c	Field	Table 2	no	na	maize	Cry3Bb	Coleoptera	MON863	not specified	not specified	silk stage	61.5	30-93	cited from EPA document	na	na	na	na	no	na	na	Arthropoda	Insecta	Coleoptera	Coccinellidae	Coleomegilla	Coleomegilla maculata	Coleomegilla maculata	predator	Chewing	EMUE	natural population of variable ages	adult	Chronic toxicology	Scandia, Kansas (2)
1744	88	Al-Deeb & Wilde	2003	Environmental Entomology 32(5): 1164-1170	Effect of Bt corn expressing the Cry3Bb1 toxin for corn rootworm control on aboveground nontarget arthropods	Academic	Department of Entomology, Kansas State University	na	na	yes	United States	North America	yes	7c	Field	Table 4	no	na	maize	Cry3Bb	Coleoptera	MON863	not specified	not specified	silk stage	61.5	30-93	cited from EPA document	na	na	na	na	no	na	na	Arthropoda	Insecta	Coleoptera	Carabidae	not specified	not specified	Carabidae	mixed	Chewing	na	natural population of variable ages	not specified	Chronic toxicology	Scandia, Kansas (2)
1745	88	Al-Deeb & Wilde	2003	Environmental Entomology 32(5): 1164-1170	Effect of Bt corn expressing the Cry3Bb1 toxin for corn rootworm control on aboveground nontarget arthropods	Academic	Department of Entomology, Kansas State University	na	na	yes	United States	North America	yes	7c	Field	Table 4	no	na	maize	Cry3Bb	Coleoptera	MON863	not specified	not specified	silk stage	61.5	30-93	cited from EPA document	na	na	na	na	no	na	na	Arthropoda	Insecta	Coleoptera	Elateridae	not specified	not specified	Elateridae	omnivore	Chewing	na	natural population of variable ages	not specified	Chronic toxicology	Scandia, Kansas (2)
1746	88	Al-Deeb & Wilde	2003	Environmental Entomology 32(5): 1164-1170	Effect of Bt corn expressing the Cry3Bb1 toxin for corn rootworm control on aboveground nontarget arthropods	Academic	Department of Entomology, Kansas State University	na	na	yes	United States	North America	yes	7c	Field	Table 4	no	na	maize	Cry3Bb	Coleoptera	MON863	not specified	not specified	silk stage	61.5	30-93	cited from EPA document	na	na	na	na	no	na	na	Arthropoda	Insecta	Coleoptera	Staphylinidae	not specified	not specified	Staphylinidae	predator	Chewing	na	natural population of variable ages	not specified	Chronic toxicology	Scandia, Kansas (2)
1747	88	Al-Deeb & Wilde	2003	Environmental Entomology 32(5): 1164-1170	Effect of Bt corn expressing the Cry3Bb1 toxin for corn rootworm control on aboveground nontarget arthropods	Academic	Department of Entomology, Kansas State University	na	na	yes	United States	North America	yes	7c	Field	Table 4	no	na	maize	Cry3Bb	Coleoptera	MON863	not specified	not specified	silk stage	61.5	30-93	cited from EPA document	na	na	na	na	no	na	na	Arthropoda	Insecta	Hymenoptera	Formicidae	not specified	not specified	Formicidae	omnivore	Mandibulate-sucking	na	natural population of variable ages	not specified	Chronic toxicology	Scandia, Kansas (2)
1748	88	Al-Deeb & Wilde	2003	Environmental Entomology 32(5): 1164-1170	Effect of Bt corn expressing the Cry3Bb1 toxin for corn rootworm control on aboveground nontarget arthropods	Academic	Department of Entomology, Kansas State University	na	na	yes	United States	North America	yes	7c	Field	Table 4	no	na	maize	Cry3Bb	Coleoptera	MON863	not specified	not specified	silk stage	61.5	30-93	cited from EPA document	na	na	na	na	no	na	na	Arthropoda	Arachnida	Araneae	not specified	not specified	not specified	Araneae	predator	Piercing	na	natural population of variable ages	not specified	Chronic toxicology	Scandia, Kansas (2)
1749	88	Al-Deeb & Wilde	2003	Environmental Entomology 32(5): 1164-1170	Effect of Bt corn expressing the Cry3Bb1 toxin for corn rootworm control on aboveground nontarget arthropods	Academic	Department of Entomology, Kansas State University	na	na	yes	United States	North America	yes	7d	Field	Table 2	no	na	maize	Cry3Bb	Coleoptera	MON863	not specified	not specified	silk stage	61.5	30-93	cited from EPA document	na	na	na	na	no	na	na	Arthropoda	Insecta	Hemiptera	Anthocoridae	Orius	Orius insidiosus	Orius insidiosus	predator	Piercing	na	natural population of variable ages	adult	Chronic toxicology	Scandia, Kansas (2)
1750	88	Al-Deeb & Wilde	2003	Environmental Entomology 32(5): 1164-1170	Effect of Bt corn expressing the Cry3Bb1 toxin for corn rootworm control on aboveground nontarget arthropods	Academic	Department of Entomology, Kansas State University	na	na	yes	United States	North America	yes	7d	Field	Table 2	no	na	maize	Cry3Bb	Coleoptera	MON863	not specified	not specified	silk stage	61.5	30-93	cited from EPA document	na	na	na	na	no	na	na	Arthropoda	Insecta	Hemiptera	Anthocoridae	Orius	Orius insidiosus	Orius insidiosus	predator	Piercing	na	natural population of variable ages	nymph	Chronic toxicology	Scandia, Kansas (2)
1751	88	Al-Deeb & Wilde	2003	Environmental Entomology 32(5): 1164-1170	Effect of Bt corn expressing the Cry3Bb1 toxin for corn rootworm control on aboveground nontarget arthropods	Academic	Department of Entomology, Kansas State University	na	na	yes	United States	North America	yes	7d	Field	Table 2	no	na	maize	Cry3Bb	Coleoptera	MON863	not specified	not specified	silk stage	61.5	30-93	cited from EPA document	na	na	na	na	no	na	na	Arthropoda	Insecta	Coleoptera	Coccinellidae	Coleomegilla	Coleomegilla maculata	Coleomegilla maculata	predator	Chewing	na	natural population of variable ages	adult	Chronic toxicology	Scandia, Kansas (2)
1752	88	Al-Deeb & Wilde	2003	Environmental Entomology 32(5): 1164-1170	Effect of Bt corn expressing the Cry3Bb1 toxin for corn rootworm control on aboveground nontarget arthropods	Academic	Department of Entomology, Kansas State University	na	na	yes	United States	North America	yes	7e	Field	Table 4	no	na	maize	Cry3Bb	Coleoptera	MON863	not specified	not specified	silk stage	61.5	30-93	cited from EPA document	na	na	na	na	no	na	na	Arthropoda	Insecta	Coleoptera	Carabidae	not specified	not specified	Carabidae	mixed	Chewing	na	natural population of variable ages	not specified	Chronic toxicology	Scandia, Kansas (2)
1753	88	Al-Deeb & Wilde	2003	Environmental Entomology 32(5): 1164-1170	Effect of Bt corn expressing the Cry3Bb1 toxin for corn rootworm control on aboveground nontarget arthropods	Academic	Department of Entomology, Kansas State University	na	na	yes	United States	North America	yes	7e	Field	Table 4	no	na	maize	Cry3Bb	Coleoptera	MON863	not specified	not specified	silk stage	61.5	30-93	cited from EPA document	na	na	na	na	no	na	na	Arthropoda	Insecta	Coleoptera	Elateridae	not specified	not specified	Elateridae	omnivore	Chewing	na	natural population of variable ages	not specified	Chronic toxicology	Scandia, Kansas (2)
1754	88	Al-Deeb & Wilde	2003	Environmental Entomology 32(5): 1164-1170	Effect of Bt corn expressing the Cry3Bb1 toxin for corn rootworm control on aboveground nontarget arthropods	Academic	Department of Entomology, Kansas State University	na	na	yes	United States	North America	yes	7e	Field	Table 4	no	na	maize	Cry3Bb	Coleoptera	MON863	not specified	not specified	silk stage	61.5	30-93	cited from EPA document	na	na	na	na	no	na	na	Arthropoda	Insecta	Coleoptera	Staphylinidae	not specified	not specified	Staphylinidae	predator	Chewing	na	natural population of variable ages	not specified	Chronic toxicology	Scandia, Kansas (2)
1755	88	Al-Deeb & Wilde	2003	Environmental Entomology 32(5): 1164-1170	Effect of Bt corn expressing the Cry3Bb1 toxin for corn rootworm control on aboveground nontarget arthropods	Academic	Department of Entomology, Kansas State University	na	na	yes	United States	North America	yes	7e	Field	Table 4	no	na	maize	Cry3Bb	Coleoptera	MON863	not specified	not specified	silk stage	61.5	30-93	cited from EPA document	na	na	na	na	no	na	na	Arthropoda	Insecta	Hymenoptera	Formicidae	not specified	not specified	Formicidae	omnivore	Mandibulate-sucking	na	natural population of variable ages	not specified	Chronic toxicology	Scandia, Kansas (2)
1756	88	Al-Deeb & Wilde	2003	Environmental Entomology 32(5): 1164-1170	Effect of Bt corn expressing the Cry3Bb1 toxin for corn rootworm control on aboveground nontarget arthropods	Academic	Department of Entomology, Kansas State University	na	na	yes	United States	North America	yes	7e	Field	Table 4	no	na	maize	Cry3Bb	Coleoptera	MON863	not specified	not specified	silk stage	61.5	30-93	cited from EPA document	na	na	na	na	no	na	na	Arthropoda	Arachnida	Araneae	not specified	not specified	not specified	Araneae	predator	Piercing	na	natural population of variable ages	not specified	Chronic toxicology	Scandia, Kansas (2)
1757	90	Al-Deeb et al. [b]	2003	Environmental Entomology 32(4): 859-865	Effect of Bt corn for corn rootworm control on nontarget soil microarthropods and nematodes	Academic	Department of Entomology, Kansas State University	na	na	yes	United States	North America	yes	1	Field	Table 1	no	na	maize	Cry3Bb	Coleoptera	MON863	not specified	not specified	early, mid and late season samples were taken	61.5	30-93	cited from EPA document	na	na	na	na	no	na	na	Arthropoda	Arachnida	Acarina	Prostigmata	not specified	not specified	Prostigmata	mixed	Unknown	na	natural population of variable ages	adult	Chronic toxicology	Manhattan, Kansas
1758	90	Al-Deeb et al. [b]	2003	Environmental Entomology 32(4): 859-865	Effect of Bt corn for corn rootworm control on nontarget soil microarthropods and nematodes	Academic	Department of Entomology, Kansas State University	na	na	yes	United States	North America	yes	1	Field	Table 1	no	na	maize	Cry3Bb	Coleoptera	MON863	not specified	not specified	early, mid and late season samples were taken	61.5	30-93	cited from EPA document	na	na	na	na	no	na	na	Arthropoda	Arachnida	Acarina	Mesostigmata	not specified	not specified	Mesostigmata	predator	Piercing	na	natural population of variable ages	adult	Chronic toxicology	Manhattan, Kansas
1759	90	Al-Deeb et al. [b]	2003	Environmental Entomology 32(4): 859-865	Effect of Bt corn for corn rootworm control on nontarget soil microarthropods and nematodes	Academic	Department of Entomology, Kansas State University	na	na	yes	United States	North America	yes	1	Field	Table 1	no	na	maize	Cry3Bb	Coleoptera	MON863	not specified	not specified	early, mid and late season samples were taken	61.5	30-93	cited from EPA document	na	na	na	na	no	na	na	Arthropoda	Arachnida	Acarina	Oribatei	not specified	not specified	Oribatei	mixed	Chewing	na	natural population of variable ages	adult	Chronic toxicology	Manhattan, Kansas
1760	90	Al-Deeb et al. [b]	2003	Environmental Entomology 32(4): 859-865	Effect of Bt corn for corn rootworm control on nontarget soil microarthropods and nematodes	Academic	Department of Entomology, Kansas State University	na	na	yes	United States	North America	yes	1	Field	Table 1	no	na	maize	Cry3Bb	Coleoptera	MON863	not specified	not specified	early, mid and late season samples were taken	61.5	30-93	cited from EPA document	na	na	na	na	no	na	na	Arthropoda	Insecta	Collembola	not specified	not specified	not specified	Collembola	detritivore	Chewing	na	natural population of variable ages	not specified	Chronic toxicology	Manhattan, Kansas
1761	90	Al-Deeb et al. [b]	2003	Environmental Entomology 32(4): 859-865	Effect of Bt corn for corn rootworm control on nontarget soil microarthropods and nematodes	Academic	Department of Entomology, Kansas State University	na	na	yes	United States	North America	yes	2a	Field	Table 1	no	na	maize	Cry3Bb	Coleoptera	MON862	not specified	not specified	early, mid and late season samples were taken	not specified	na	na	na	na	na	na	no	na	na	Arthropoda	Arachnida	Acarina	Prostigmata	not specified	not specified	Prostigmata	mixed	Unknown	CMUE	natural population of variable ages	adult	Chronic toxicology	Scandia, Kansas
1762	90	Al-Deeb et al. [b]	2003	Environmental Entomology 32(4): 859-865	Effect of Bt corn for corn rootworm control on nontarget soil microarthropods and nematodes	Academic	Department of Entomology, Kansas State University	na	na	yes	United States	North America	yes	2a	Field	Table 1	no	na	maize	Cry3Bb	Coleoptera	MON862	not specified	not specified	early, mid and late season samples were taken	not specified	na	na	na	na	na	na	no	na	na	Arthropoda	Arachnida	Acarina	Mesostigmata	not specified	not specified	Mesostigmata	predator	Piercing	CMUE	natural population of variable ages	adult	Chronic toxicology	Scandia, Kansas
1763	90	Al-Deeb et al. [b]	2003	Environmental Entomology 32(4): 859-865	Effect of Bt corn for corn rootworm control on nontarget soil microarthropods and nematodes	Academic	Department of Entomology, Kansas State University	na	na	yes	United States	North America	yes	2a	Field	Table 1	no	na	maize	Cry3Bb	Coleoptera	MON862	not specified	not specified	early, mid and late season samples were taken	not specified	na	na	na	na	na	na	no	na	na	Arthropoda	Arachnida	Acarina	Oribatei	not specified	not specified	Oribatei	mixed	Chewing	CMUE	natural population of variable ages	adult	Chronic toxicology	Scandia, Kansas
[truncated: 2,362 more rows]
[truncated: 57 more columns]
