# Supplementary material for: Bt Crop Effects on Functional Guilds of Non-Target Arthropods: A Meta-Analysis
Source: PLoS One. 2008 May 7;3(5):e2118. doi: 10.1371/journal.pone.0002118 (PMC2346550; doi:10.1371/journal.pone.0002118)
Supplement: Appendix S2 — Taxonomic groups associated with functional guilds. (0.16 MB DOC) [file pone.0002118.s002.doc]

| Phylum | Class | Order | Family | *Genus* |
| --- | --- | --- | --- | --- |
| **Detritivores** |  |  |  |  |
| Annelida | Oligochaeta1 |  |  |  |
| Arthropoda | Entognatha | Diplura | Japygidae1 |  |
| Insecta | Coleoptera | Languriidae1 |  |
| Lathridiidae1 | *Cortinicara* |
| Collembola1 | Entomobryidae1 | *Entomobrya, Lepidocyrtus, Orchesella, Pseudosinella, Sinella, Tomocerus* |
| Hypogastruridae1 | *Hypogastrura* |
| Isotomidae1 | *Folsomides, Isotoma, Isotomodes,* |
| Onychiuridae1 | *Onychiurus, Tullbergia* |
| Sminthuridae1 | *Bourletiella, Sminthurinus, Sphaeridia* |
| Diptera | Drosophilidae1, Heleomyzidae1, Lauxaniidae1, Muscidae1, Scatopsidae1, Sciaridae1, Tipulidae1 |  |
| Psocoptera1 |  |  |
| **Herbivores** |  |  |  |  |
| Arthropoda | Arachnida | Acarina1 |  |  |
| Insecta | Coleoptera | Cerambycidae1, Cetoniidae1, Curculionidae1, Scarabaeidae1, Tenebrionidae1 |  |
| Chrysomelidae1 | *Altica, Chaetocnema, Oulema* |
| Diptera | Agromyzidae1, Cecidomyiidae1, Fergusoninidae1, Tephritidae1 |  |
| Otitidae | *Euxesta* |
| Hemiptera | Aleyrodidae1 | *Bemisia* |
| Alydidae1 |  |
| Aphididae1 | *Macrosiphum, Metopolophium, Rhopalosiphum, Sitobion,* |
| Aphidoidea1, Auchenorrhyncha1 |  |
| Cicadellidae1 | *Empoasca, Macrosteles, Psammotettix, Zyginidia* |
| Delphacidae | *Laodelphax, Nilaparvata, Sogatella* |
| Lygaeidae1 | *Nysius, Oxycarenu* |
| Miridae1 | *Lygus, Pseudatomoscelis, Taylorilygus* |
| Pentatomidae | *Acrosternum, Nezara* |
| Pyrrhocoridae | *Dysdercus* |
| Scutelleridae | *Tectocoris* |
| Sternorrhyncha1 |  |
| Hymenoptera | Agaonidae1 |  |
| Lepidoptera1 | Gelechiidae | *Phthorimaea* |
| Geometridae1 |  |
| Noctuidae | *Pseudoplusia, Sesamia, Spodoptera* |
| Tortricidae | *Crocidosema* |
| Orthoptera | Acrididae1 |  |
| Thysanoptera | Phloeothripidae | *Haplothrips* |
| Thripidae1 | *Chirothrips, Frankliniella, Limothrips* |
| **Mixed** |  |  |  |  |
| Arthropoda | Arachnida | Acarina | Astigmata1, Oribatei1, Prostigmata1 |  |
| Insecta | Coleoptera1 | Anthicidae, Cetoniidae, Curculionidae, Lathridiidae, Scarabaeidae, Carabidae, Cucujidae, Nitidulidae, Phalacridae |  |
| Coleoptera, Diptera, Neuroptera2 | Chrysopidae, Coccinellidae, Hemerobidae, Syrphidae |  |
| Dermaptera1 |  |  |
| Diptera1 | Brachycera, Chloropidae, Ephydridae, Phoridae, Platystomatidae, Psychodidae |  |
| Hemiptera1 | Pentatomidae |  |
| Hymenoptera1, Orthoptera1, Thysanoptera1 |  |  |
| **Omnivores** |  |  |  |  |
| Arthropoda | Insecta | Blattodea1 |  |  |
| Coleoptera | Carabidae | *Calathus, Dolichus, Harpalus* |
| Elateridae1*,* Mycetophagidae1 |  |
| Nitidulidae | *Carpophilus* |
| Dermaptera | Carcinophoridae | *Euborellia* |
| Forficulidae | *Forticula* |
| Labiduridae1 | *Labidura* |
| Diptera | Anthomyiidae1*,* Ceratopogonidae1 |  |
| Chironomidae1 | *Smittia* |
| Hemiptera | Miridae | *Campylomma, Rhinacloa, Spanogonicus* |
| Hymenoptera | Formicidae1 | *Iridomyrmex, Rhytidoponera, Solenopsis* |
| Orthoptera | Gryllidae1 |  |
| **Parasitoids** |  |  |  |  |
| Arthropoda | Insecta | Diptera | Pipunculidae1*,* Pyrgotidae1 |  |
| Tachinidae1 | *Lydella, Pseudoperichaeta* |
| Hymenoptera | Aphelinidae1, Bethylidae1 , Ceraphronidae1, Chalcididae1, Chalcidoidea1, Diapriidae1, Elasmidae1, Encyrtidae1, Eucoilidae1, Eupelmidae1, Figitidae1, Mymaridae1, Mymarommatidae1, Perilampidae1, Platygastridae1, Pteromalidae1, Torymidae1, Trichogrammatidae1 |  |
|  |
| Braconidae1 | *Macrocentrus* |
| Eulophidae1 | *Hemiptarsenus* |
| Ichneumonidae | *Eriborus* |
| Scelionidae1 | *Telenomus* |
| **Predators** |  |  |  |  |
| Arthropoda | Arachnida | Acarina | Mesostigmata1 |  |
| Araneae1 | Clubionidae1 Oxyopidae1, Salticidae1, Theridiidae1 |  |
| Dictynidae | *Dictyna* |
| Thomisidae1 | *Misumenops,* |
| Chilopoda1 |  |  |  |
|  | Coleoptera | Anthicidae | *Notoxus* |
| Cantharidae1, Cleridae1, Histeridae1, Staphylinidae1 |  |
| Carabidae | *Lebia, Microlestes, Poecilus, Scarites, Trechus* |
| Cicindelidae1 | *Cicindela, Megacephala* |
| Coccinellidae1 | *Adalia, Coccinella, Coleomegilla, Cycloneda, Diomus, Microweisea, Harmonia, Hippodamia, Propylea, Psyllobora, Scymnus* |
| Melyridae1 | *Collops, Dicranolaius* |
| Dermaptera | Forficulidae | *Doru* |
| Diptera | Dolichopodidae1 |  |
| Empididae1 | *Drapetis* |
| Syrphidae1 | *Syrphus* |
| Hemiptera | Anthocoridae1 | *Orius* |
| Geocoridae | *Geocoris* |
| Miridae | *Deraeocoris* |
| Nabidae1 | *Nabis, Nabus* |
| Pentatomidae | *Cermatulus, Oechalia, Podisus, Stiretrus* |
| Reduviidae1 | *Sinea, Zelus* |
| Neuroptera1 | Chrysopidae1 | *Chrysoperla* |
| Hemerobiidae1 | *Hemerobius, Micromus* |
| Odonata1 |  |  |

1Indicates that some studies specified only this level of taxonomy,

2Used as a taxonomic grouping in some studies
